# Supplementary material for: The impact of “poverty alleviation” on the income of urban and rural residents in state-level impoverished counties: evidence from China
Source: Research Square preprint supplement (doi:10.21203/rs.3.rs-5909515/v1), 2025-02-04
Supplement: Supplementary file 1 [file 4eacb06cfdecf5c74a2054e7.xlsx]

## Sheet: Sheet1
countyid	year	did	province	east	middle	west	ethnic	nonethnic	moneycpiw	citymcpiw	pop	second	third	save	loan	exp	scale	nongye	edu	medi	welbed	thi_sec	fir_sec	cai
1	2013	0	Hebei	1	0	0	0	1	0.4564	1.411	4.96853	0.430277	0.304114	1.76884	0.829263	0.218494	13.1577	0.54	0.206692	0.119143	0.0737	0.706785	0.617297	0.160593
1	2014	0	Hebei	1	0	0	0	1	0.49882	1.42577	4.96223	0.436236	0.297151	1.86573	0.852003	0.21247	13.2705	0.54	0.214349	0.123951	0.0802	0.68117	0.611166	0.172027
1	2015	0	Hebei	1	0	0	0	1	0.54443	1.52071	4.9559	0.398475	0.326782	2.09491	1.0243	0.312103	13.3043	0.54	0.22364	0.155523	0.128	0.820083	0.689486	0.141575
1	2016	0	Hebei	1	0	0	0	1	0.60497	1.66126	4.94952	0.385884	0.356392	2.10586	1.08707	0.293773	13.3599	0.29	0.227873	0.171727	0.285	0.923574	0.667881	0.17821
1	2017	0	Hebei	1	0	0	0	1	0.67213	1.80689	4.94311	0.389887	0.349554	1.99856	0.986357	0.317355	13.4557	0.29	0.234432	0.197838	0.2872	0.896554	0.668294	0.147744
1	2018	0	Hebei	1	0	0	0	1	0.75551	1.96916	4.93665	0.394578	0.347549	1.90595	0.950479	0.316075	13.5485	0.299	0.241566	0.206783	0.3202	0.880812	0.65354	0.141732
1	2019	1	Hebei	1	0	0	0	1	1.20118	2.28515	4.93015	0.35396	0.399255	1.71917	0.884245	0.259713	13.6381	0.2955	0.252074	0.208375	0.1288	1.12797	0.697209	0.204661
1	2020	1	Hebei	1	0	0	0	1	1.41928	2.81284	4.92365	0.31736	0.415181	1.93617	1.01504	0.286736	13.7249	0.304	0.250595	0.209593	0.1288	1.30823	0.842761	0.154478
2	2013	0	Hebei	1	0	0	0	1	0.4417	2.12	4.52046	0.561031	0.261645	0.786246	0.346593	0.136079	11.9429	0.56	0.104427	0.078863	0.3765	0.466365	0.316068	0.191942
2	2014	0	Hebei	1	0	0	0	1	0.49646	2.1239	4.53223	0.494383	0.318124	0.859007	0.3776	0.146532	11.8767	0.58	0.109463	0.08769	0.3782	0.643477	0.379247	0.193818
2	2015	0	Hebei	1	0	0	0	1	0.53888	2.26157	4.53515	0.482904	0.324521	0.943646	0.388051	0.181604	14.2212	0.6	0.117196	0.091732	0.348	0.67202	0.398784	0.181453
2	2016	0	Hebei	1	0	0	0	1	0.59191	2.40067	4.53515	0.433274	0.381774	1.10132	0.530227	0.206429	13.9961	0.46	0.111743	0.109616	0.3332	0.881136	0.426871	0.190286
2	2017	0	Hebei	1	0	0	0	1	0.65412	2.5605	4.53544	0.365829	0.390842	1.06892	0.533244	0.204091	13.5998	0.48	0.125997	0.110684	0.3368	1.06837	0.665143	0.200165
2	2018	0	Hebei	1	0	0	0	1	0.77631	2.69057	4.52636	0.25619	0.470513	1.37239	0.630589	0.273108	13.7651	0.491	0.12231	0.118375	0.3866	1.83658	1.06678	0.196053
2	2019	1	Hebei	1	0	0	0	1	0.84104	2.83612	4.5293	0.17665	0.560474	1.43285	0.920033	0.266511	13.6962	0.4956	0.127374	0.132434	0.1102	3.1728	1.48812	0.216809
2	2020	1	Hebei	1	0	0	0	1	0.89211	2.89157	4.43399	0.157318	0.559076	1.55142	0.995544	0.268482	13.7249	0.5	0.129405	0.135323	0.1071	3.55379	1.80275	0.237806
3	2013	0	Hebei	1	0	0	0	1	0.4487	1.92	4.21487	0.62018	0.205463	0.46678	0.29115	0.122717	14.399	0.49	0.081797	0.063426	0.1833	0.331296	0.28114	0.202292
3	2014	0	Hebei	1	0	0	0	1	0.44336	1.93708	4.22684	0.590802	0.241351	0.511205	0.314319	0.126517	14.4775	0.51	0.092555	0.063601	0.1719	0.408515	0.284099	0.206702
3	2015	0	Hebei	1	0	0	0	1	0.4956	2.1056	4.2308	0.560258	0.258259	0.58932	0.357015	0.154157	14.4858	0.51	0.101878	0.066368	0.1611	0.460965	0.323928	0.186793
3	2016	0	Hebei	1	0	0	0	1	0.55014	2.23743	4.2308	0.547502	0.282971	0.659852	0.394717	0.157532	14.4376	0.5	0.108058	0.07587	0.1583	0.516839	0.309638	0.204182
3	2017	0	Hebei	1	0	0	0	1	0.60798	2.38446	4.23238	0.470702	0.362618	0.82656	0.473093	0.187189	14.4241	0.52	0.105622	0.082715	0.1623	0.770377	0.35411	0.210494
3	2018	0	Hebei	1	0	0	0	1	0.74451	2.50791	4.22287	0.286176	0.488912	1.19972	0.669601	0.269053	14.4119	0.5329	0.111152	0.08535	0.2275	1.70843	0.78592	0.207166
3	2019	1	Hebei	1	0	0	0	1	0.81096	2.64602	4.2308	0.298618	0.458633	1.32023	0.700745	0.260255	14.4008	0.7138	0.114345	0.087598	0.0234	1.53585	0.812907	0.218997
3	2020	1	Hebei	1	0	0	0	1	0.86339	2.78324	4.19048	0.26559	0.469859	1.50119	0.779772	0.277897	14.3907	0.75	0.127656	0.093108	0.0288	1.76911	0.996087	0.219152
4	2013	0	Hebei	1	0	0	0	1	0.5137	2.17	4.78872	0.666743	0.239421	0.520359	0.221358	0.08957	15.5788	0.98	0.150855	0.114173	0.2277	0.35909	0.140738	0.422461
4	2014	0	Hebei	1	0	0	0	1	0.57866	2.20256	4.79997	0.640686	0.263457	0.572953	0.244116	0.107434	15.5189	1	0.157037	0.116699	0.2876	0.411211	0.149616	0.373008
4	2015	0	Hebei	1	0	0	0	1	0.64484	2.35905	4.80221	0.569544	0.330212	0.716694	0.309098	0.142424	15.1548	1.03	0.161966	0.121184	0.2528	0.579783	0.176007	0.350091
4	2016	0	Hebei	1	0	0	0	1	0.69812	2.5063	4.80444	0.579403	0.333068	0.728302	0.474572	0.154676	15.2436	0.59	0.167883	0.148801	0.236	0.574847	0.151068	0.334256
4	2017	0	Hebei	1	0	0	0	1	0.7736	2.66946	4.80444	0.603345	0.338303	0.703163	0.466798	0.134275	15.2153	0.59	0.171891	0.151381	0.3238	0.560712	0.096714	0.384447
4	2018	1	Hebei	1	0	0	0	1	0.86191	2.80501	4.79773	0.513764	0.416639	0.885665	0.557003	0.187053	15.1906	0.6779	0.168583	0.164497	0.2995	0.810953	0.135465	0.420206
4	2019	1	Hebei	1	0	0	0	1	0.93469	2.95948	4.79549	0.600814	0.336078	0.907014	0.57244	0.175877	15.1692	0.6917	0.199815	0.169042	0.0492	0.559372	0.105037	0.462551
4	2020	1	Hebei	1	0	0	0	1	1.01988	3.11593	4.74715	0.590123	0.33551	0.987367	0.546616	0.185853	15.1505	0.72	0.188704	0.157136	0.0584	0.568544	0.126019	0.450055
5	2013	0	Hebei	1	0	0	0	1	0.6289	2.34	4.90545	0.444889	0.342898	0.813549	0.535682	0.184674	13.6243	0.3	0.123048	0.12682	0.0603	0.770748	0.477002	0.288079
5	2014	0	Hebei	1	0	0	0	1	0.67719	2.46805	4.89182	0.386484	0.379755	0.901325	0.560494	0.18518	13.4852	0.27	0.130883	0.124331	0.06	0.982588	0.60484	0.272286
5	2015	0	Hebei	1	0	0	0	1	0.74856	2.64175	4.8712	0.186064	0.507129	1.04775	0.649427	0.212434	12.3699	0.25	0.140291	0.128299	0.316	2.72556	1.64893	0.148626
5	2016	0	Hebei	1	0	0	0	1	0.82583	2.80398	4.85015	0.148264	0.492688	1.14021	0.682693	0.232045	12.3644	0.12	0.146792	0.133876	0.322	3.32305	2.42168	0.136366
5	2017	0	Hebei	1	0	0	0	1	0.90368	2.98524	4.82864	0.154042	0.513572	1.15578	0.675568	0.234688	12.2596	0.12	0.152259	0.140809	0.5325	3.33397	2.15775	0.146324
5	2018	1	Hebei	1	0	0	0	1	0.98754	3.134	4.80666	0.185467	0.496505	1.09288	0.649121	0.232586	12.1652	0.1196	0.159635	0.146044	0.6009	2.67705	1.71475	0.144591
5	2019	1	Hebei	1	0	0	0	1	1.07755	3.30662	4.78419	0.264154	0.381014	1.29273	0.870906	0.257066	12.0801	0.1231	0.158503	0.149826	0.071	1.44239	1.34328	0.143341
5	2020	1	Hebei	1	0	0	0	1	1.13033	3.34859	4.76384	0.196749	0.412584	1.45436	0.958068	0.272795	12.0034	0.124	0.158665	0.191381	0.071	2.09701	1.98562	0.148012
6	2013	0	Hebei	1	0	0	0	1	0.7821	1.88	5.35414	0.427614	0.317138	0.578119	0.416331	0.165435	14.4164	1.01	0.32125	0.140535	0.5051	0.741646	0.59691	0.116713
6	2014	0	Hebei	1	0	0	0	1	0.86746	1.97641	5.35927	0.42569	0.307605	0.671501	0.567483	0.175047	14.5072	1.03	0.328254	0.184392	0.5395	0.722603	0.626523	0.124431
6	2015	0	Hebei	1	0	0	0	1	0.95483	2.15434	5.36564	0.402087	0.338946	0.860391	0.632526	0.231766	14.4881	1.07	0.349576	0.212045	0.4919	0.842967	0.644056	0.106617
6	2016	0	Hebei	1	0	0	0	1	1.03911	2.32385	5.37198	0.40944	0.334721	0.98152	0.707625	0.201852	14.4375	0.71	0.279681	0.293899	0.4653	0.817508	0.62485	0.136181
6	2017	0	Hebei	1	0	0	0	1	1.13079	2.50593	5.37198	0.386307	0.436635	1.08409	0.815122	0.22068	14.4033	0.73	0.37112	0.308733	0.475	1.13028	0.458336	0.145503
6	2018	0	Hebei	1	0	0	0	1	1.25885	2.70896	5.37827	0.300726	0.508213	1.37414	1.03509	0.282356	14.3732	0.7474	0.380469	0.313547	0.4723	1.68996	0.635334	0.122551
6	2019	1	Hebei	1	0	0	0	1	1.36997	2.93762	5.38203	0.293586	0.526781	1.41571	1.19454	0.288747	14.3468	0.7649	0.390946	0.325448	0.0508	1.7943	0.611858	0.126455
6	2020	1	Hebei	1	0	0	0	1	1.49262	3.17593	5.28551	0.281315	0.527534	1.53073	1.38969	0.304568	14.3235	0.77	0.405023	0.36293	0.1151	1.87524	0.679488	0.1232
7	2013	0	Hebei	1	0	0	0	1	0.8202	1.72	5.41643	0.330668	0.447248	0.550326	0.298312	0.16077	14.1439	1.22	0.283335	0.16559	0.5292	1.35256	0.671621	0.200267
7	2014	0	Hebei	1	0	0	0	1	0.90453	1.96657	5.42245	0.353181	0.411858	0.644715	0.368745	0.186397	14.3375	1.27	0.287463	0.169919	0.3342	1.16614	0.665271	0.207018
7	2015	0	Hebei	1	0	0	0	1	0.99265	2.1251	5.42245	0.366111	0.400021	0.766367	0.463748	0.225419	14.5132	1.29	0.351121	0.180289	0.4917	1.09262	0.638793	0.177306
7	2016	0	Hebei	1	0	0	0	1	1.08049	2.29504	5.43557	0.405888	0.391224	0.85267	0.528431	0.256177	14.7148	0.65	0.336336	0.219576	0.4448	0.963871	0.49986	0.169101
7	2017	0	Hebei	1	0	0	0	1	1.17598	2.47902	5.41401	0.448656	0.362955	0.824069	0.535033	0.21918	14.8888	0.73	0.371993	0.237708	0.4596	0.808982	0.419897	0.190516
7	2018	1	Hebei	1	0	0	0	1	1.28732	2.66783	5.41522	0.424614	0.389173	0.957299	0.669341	0.23776	15.0522	0.7463	0.407599	0.244153	0.7857	0.916533	0.438548	0.199682
7	2019	1	Hebei	1	0	0	0	1	1.4023	2.89039	5.41643	0.436514	0.382967	1.02785	0.700766	0.254977	15.2055	0.7748	0.431474	0.267205	0.5156	0.877332	0.413547	0.184526
7	2020	1	Hebei	1	0	0	0	1	1.52019	3.12141	5.37827	0.402784	0.402371	1.19103	0.875649	0.284616	15.3494	0.7749	0.446969	0.267818	0.5111	0.998976	0.483747	0.178445
8	2013	0	Hebei	1	0	0	0	1	0.5255	1.5777	4.01596	0.674482	0.173643	0.880296	0.308651	0.139427	14.1659	0.25	0.084426	0.056441	0.3513	0.257446	0.225173	0.278241
8	2014	0	Hebei	1	0	0	0	1	0.61288	1.72351	4.01553	0.580407	0.248186	0.989654	0.37661	0.133095	13.9784	0.25	0.088319	0.05692	0.4244	0.427607	0.295323	0.303289
8	2015	0	Hebei	1	0	0	0	1	0.6775	1.88919	4.01062	0.543978	0.271478	1.09751	0.483197	0.177601	13.9142	0.26	0.090985	0.058313	0.1536	0.49906	0.33925	0.235704
8	2016	0	Hebei	1	0	0	0	1	0.74478	2.05267	4.00568	0.533484	0.303631	1.23558	0.692828	0.205046	14.0872	0.24	0.09392	0.067944	0.133	0.569148	0.305322	0.189326
8	2017	0	Hebei	1	0	0	0	1	0.79871	2.19743	4.00072	0.572423	0.312663	1.22174	0.812683	0.204159	14.2206	0.25	0.098733	0.088867	0.139	0.54621	0.200749	0.190312
8	2018	0	Hebei	1	0	0	0	1	0.8767	2.33689	3.99573	0.352843	0.485911	1.89207	1.27422	0.325141	14.3057	0.2541	0.10436	0.093235	0.1554	1.37713	0.456991	0.183486
8	2019	1	Hebei	1	0	0	0	1	0.96358	2.51128	3.99573	0.264529	0.559078	2.12351	1.41291	0.373479	14.3598	0.2665	0.11059	0.095277	0.0526	2.11348	0.666817	0.177953
8	2020	1	Hebei	1	0	0	0	1	1.01732	2.57515	3.9947	0.249244	0.566676	2.28805	1.57106	0.37557	14.3943	0.2649	0.112629	0.095865	0.0705	2.27358	0.738549	0.188465
9	2013	0	Hebei	1	0	0	0	1	0.5062	1.65	4.71357	0.409119	0.28917	1.30151	0.672053	0.238291	13.2881	0.65	0.116553	0.079589	0.2753	0.70681	0.737465	0.213842
9	2014	0	Hebei	1	0	0	0	1	0.55979	1.74042	4.73767	0.345168	0.344418	1.4704	0.803344	0.217089	13.377	0.67	0.126455	0.09461	0.4047	0.997828	0.899313	0.278756
9	2015	0	Hebei	1	0	0	0	1	0.60546	1.90089	4.73767	0.330401	0.346492	1.49058	0.689617	0.293381	13.2919	0.69	0.132056	0.092239	0.4152	1.0487	0.977925	0.17831
9	2016	0	Hebei	1	0	0	0	1	0.65241	2.05497	4.75514	0.332097	0.354336	1.54835	0.727523	0.319792	13.3211	0.44	0.139504	0.130419	0.4211	1.06696	0.944202	0.168653
9	2017	0	Hebei	1	0	0	0	1	0.7068	2.22936	4.65584	0.293288	0.342038	1.42352	0.73708	0.242292	13.3481	0.44	0.148458	0.127787	0.4196	1.16622	1.2434	0.212109
9	2018	0	Hebei	1	0	0	0	1	0.77659	2.37525	4.76352	0.279927	0.365616	1.55938	0.844583	0.282827	13.3729	0.4541	0.157854	0.158601	0.4223	1.30611	1.26625	0.191375
9	2019	1	Hebei	1	0	0	0	1	0.85431	2.55951	4.77046	0.262114	0.429795	1.47464	0.840373	0.270683	13.3955	0.4768	0.163771	0.165375	0.1335	1.63973	1.17541	0.189722
9	2020	1	Hebei	1	0	0	0	1	0.93222	2.7532	4.76399	0.249552	0.439989	1.64389	1.03615	0.273195	13.4163	0.4748	0.17343	0.177803	0.2073	1.76311	1.24406	0.198583
10	2013	0	Hebei	1	0	0	0	1	0.4424	1.59	3.77259	0.44736	0.310944	1.52628	0.805088	0.306371	12.5427	0.35	0.040115	0.040309	0.1662	0.695066	0.540272	0.103373
10	2014	0	Hebei	1	0	0	0	1	0.49587	1.62242	3.74919	0.379805	0.303901	1.65949	0.930336	0.304538	12.7843	0.35	0.039941	0.043244	0.1181	0.80015	0.832783	0.135253
10	2015	0	Hebei	1	0	0	0	1	0.54083	1.75467	3.72523	0.346858	0.317831	1.72332	0.87617	0.359898	12.8704	0.36	0.041198	0.04308	0.1294	0.916314	0.966712	0.128748
10	2016	0	Hebei	1	0	0	0	1	0.59133	1.91093	3.70069	0.384593	0.328846	1.75239	0.848481	0.410586	12.8571	0.29	0.039011	0.046761	0.087	0.855049	0.745104	0.121446
10	2017	0	Hebei	1	0	0	0	1	0.65403	2.08791	3.67553	0.405667	0.348048	1.72364	0.867678	0.339264	12.9184	0.3	0.039818	0.04865	0.1016	0.857964	0.60711	0.146451
10	2018	0	Hebei	1	0	0	0	1	0.73961	2.26322	3.64971	0.419046	0.321538	1.60027	0.840704	0.334165	12.9729	0.31	0.041049	0.053164	0.0996	0.76731	0.619062	0.139595
10	2019	1	Hebei	1	0	0	0	1	0.82225	2.42991	3.62322	0.407255	0.341923	1.46941	0.808829	0.253282	13.0214	0.32	0.043214	0.049397	0.0171	0.83958	0.615883	0.166375
10	2020	1	Hebei	1	0	0	0	1	0.89343	2.5839	3.59596	0.390252	0.34043	1.56556	0.912783	0.271757	13.0644	0.32	0.044438	0.143771	0.0176	0.872332	0.690112	0.16891
11	2013	0	Hebei	1	0	0	0	1	0.5113	1.6	4.3322	0.371466	0.301321	0.783229	0.325972	0.224271	12.7228	0.29	0.072059	0.061049	0.3635	0.811169	0.880871	0.098461
11	2014	0	Hebei	1	0	0	0	1	0.56637	1.76008	4.33256	0.344996	0.33066	0.923628	0.377989	0.242714	12.8966	0.29	0.087056	0.064565	0.2087	0.958447	0.940138	0.101976
11	2015	0	Hebei	1	0	0	0	1	0.62495	1.91064	4.33256	0.36479	0.337358	1.07538	0.469348	0.317101	12.9137	0.3	0.093286	0.0659	0.1961	0.924799	0.816501	0.111718
11	2016	0	Hebei	1	0	0	0	1	0.68217	2.05497	4.33292	0.396967	0.328856	1.09324	0.552426	0.307684	12.9877	0.22	0.093773	0.073356	0.1621	0.828421	0.690679	0.122461
11	2017	0	Hebei	1	0	0	0	1	0.75588	2.23334	4.33328	0.429314	0.355336	1.16993	0.715251	0.272495	13.053	0.22	0.094521	0.076822	0.1725	0.827683	0.501613	0.150623
11	2018	0	Hebei	1	0	0	0	1	0.8437	2.40345	4.33363	0.396922	0.383831	1.27528	0.946605	0.33514	13.0734	0.2307	0.094545	0.094524	0.1887	0.967018	0.552368	0.131991
11	2019	1	Hebei	1	0	0	0	1	0.93225	2.60159	4.33399	0.38269	0.406269	1.26942	0.899874	0.314777	13.0799	0.2368	0.105147	0.093304	0.0963	1.06161	0.551467	0.15844
11	2020	1	Hebei	1	0	0	0	1	1.02615	2.83052	4.33436	0.355595	0.421002	1.43629	1.03532	0.358139	13.0819	0.243	0.117054	0.100175	0.129	1.18394	0.628249	0.168458
12	2013	0	Hebei	1	0	0	0	1	0.5924	1.74	4.40129	0.386735	0.345939	1.39199	0.536713	0.264612	13.0167	0.36	0.118344	0.074847	0.106	0.894512	0.691236	0.218127
12	2014	0	Hebei	1	0	0	0	1	0.66588	1.75025	4.41115	0.392975	0.36351	1.29765	0.575488	0.257871	13.1953	0.37	0.12531	0.07518	0.2688	0.92502	0.619671	0.23485
12	2015	0	Hebei	1	0	0	0	1	0.73667	1.90089	4.421	0.370676	0.388017	1.33278	0.567765	0.275104	13.2522	0.38	0.13246	0.08818	0.2997	1.04678	0.650992	0.230277
12	2016	0	Hebei	1	0	0	0	1	0.7975	2.05104	4.43076	0.383878	0.391918	1.3547	0.628962	0.260788	13.305	0.28	0.132316	0.102618	0.1971	1.02094	0.58405	0.238311
12	2017	0	Hebei	1	0	0	0	1	0.86162	2.21581	4.44042	0.390758	0.409443	1.32543	0.718514	0.24343	13.3478	0.3	0.131747	0.109125	0.2041	1.04782	0.511312	0.193217
12	2018	1	Hebei	1	0	0	0	1	0.94067	2.3673	4.45316	0.391925	0.410634	1.33671	0.773032	0.254452	13.3821	0.31	0.134971	0.120995	0.2052	1.04774	0.503772	0.18992
12	2019	1	Hebei	1	0	0	0	1	1.03565	2.56709	4.46261	0.365356	0.453837	1.35103	0.782123	0.282673	13.4094	0.31	0.136352	0.122503	0.0845	1.24218	0.49488	0.184636
12	2020	1	Hebei	1	0	0	0	1	1.10559	2.68507	4.47715	0.359196	0.453822	1.46127	0.99593	0.312693	13.4312	0.32	0.139475	0.126442	0.0705	1.26344	0.520557	0.174205
13	2013	0	Hebei	1	0	0	0	1	0.5445	1.56	5.12713	0.24517	0.343988	1.24002	0.564121	0.275852	13.0693	0.78	0.164604	0.129623	0.5924	1.40306	1.67574	0.184198
13	2014	0	Hebei	1	0	0	0	1	0.59459	1.63147	5.14313	0.255319	0.350473	1.26471	0.602644	0.277203	13.2112	0.91	0.178809	0.142424	0.376	1.37269	1.54399	0.18417
13	2015	0	Hebei	1	0	0	0	1	0.64903	1.78391	5.15888	0.281258	0.336482	1.27071	0.604888	0.301337	13.3918	0.91	0.195378	0.14236	0.376	1.19635	1.35911	0.168588
13	2016	0	Hebei	1	0	0	0	1	0.70762	1.93974	5.16387	0.283687	0.348217	1.29978	0.650514	0.27287	13.6123	0.66	0.211881	0.159994	0.2386	1.22747	1.29754	0.185073
13	2017	0	Hebei	1	0	0	0	1	0.76583	2.10534	5.05178	0.348151	0.384748	1.4991	0.845029	0.316227	13.7638	0.67	0.225066	0.161155	0.2837	1.10512	0.767198	0.181935
13	2018	1	Hebei	1	0	0	0	1	0.83834	2.25129	5.16821	0.322188	0.408607	1.56801	0.994875	0.306339	13.8641	0.69	0.249867	0.185897	0.3034	1.26823	0.835553	0.193426
13	2019	1	Hebei	1	0	0	0	1	0.92466	2.46107	5.17131	0.254151	0.475267	1.66385	1.18443	0.295257	13.9304	0.71	0.264443	0.18517	0.235	1.87002	1.06466	0.200702
13	2020	1	Hebei	1	0	0	0	1	1.003	2.69568	5.16231	0.237747	0.486892	1.8114	1.38573	0.324412	13.9743	0.71	0.274534	0.198344	0.3073	2.04795	1.15821	0.186868
14	2013	0	Hebei	1	0	0	0	1	0.5834	1.61	4.49651	0.251906	0.51948	1.46275	0.902464	0.33181	12.2207	0.28	0.097071	0.061486	0.0667	2.0622	0.907539	0.211727
14	2014	0	Hebei	1	0	0	0	1	0.65448	1.69125	4.49043	0.258505	0.516651	1.5644	0.920063	0.299097	12.2545	0.29	0.098918	0.062097	0.0667	1.99861	0.869786	0.273429
14	2015	0	Hebei	1	0	0	0	1	0.72799	1.85215	4.48431	0.242416	0.559323	1.55964	1.20389	0.34806	12.1187	0.29	0.102939	0.067426	0.0642	2.30729	0.817855	0.398984
14	2016	0	Hebei	1	0	0	0	1	0.80173	2.01656	4.47816	0.218564	0.580163	1.65291	1.35067	0.349168	12.0293	0.17	0.105252	0.086752	0.1582	2.65444	0.920891	0.308633
14	2017	0	Hebei	1	0	0	0	1	0.88436	2.1819	4.47197	0.227503	0.580438	1.65459	1.39402	0.311513	11.9665	0.18	0.108825	0.092874	0.1302	2.55134	0.844206	0.305933
14	2018	0	Hebei	1	0	0	0	1	0.97497	2.36508	4.46574	0.232755	0.579357	1.63258	1.41368	0.314202	11.9101	0.18	0.112775	0.097805	0.1485	2.48913	0.807234	0.308289
14	2019	1	Hebei	1	0	0	0	1	1.0725	2.56465	4.45947	0.171837	0.640065	1.61074	1.51824	0.278095	11.8594	0.18	0.115675	0.099601	0.0892	3.72483	1.09463	0.27465
14	2020	1	Hebei	1	0	0	0	1	1.14801	2.65494	4.45237	0.159703	0.635783	1.78122	1.58234	0.281651	11.8139	0.19	0.11877	0.113065	0.1656	3.98102	1.28059	0.272476
15	2013	0	Hebei	1	0	0	0	1	0.4474	1.02	3.99573	0.225175	0.522292	1.52426	0.645462	0.569307	11.4296	0.36	0.097071	0.037829	0.0527	2.31949	1.12149	0.108739
15	2014	0	Hebei	1	0	0	0	1	0.50639	1.14061	3.99147	0.226888	0.505949	1.47705	0.663224	0.551602	11.3765	0.37	0.080455	0.037908	0.052	2.22995	1.17752	0.117688
15	2015	0	Hebei	1	0	0	0	1	0.56686	1.26726	3.9872	0.233857	0.545535	1.67959	0.7932	0.694119	11.4623	0.31	0.076644	0.051529	0.052	2.33277	0.943346	0.101142
15	2016	0	Hebei	1	0	0	0	1	0.62821	1.38279	3.9829	0.2296	0.538244	1.92674	1.05044	0.886019	11.3755	0.09	0.08684	0.06183	0.1203	2.34427	1.01113	0.082077
15	2017	0	Hebei	1	0	0	0	1	0.70159	1.52275	3.97859	0.241003	0.55121	2.02349	1.19367	0.61988	11.3974	0.09	0.088826	0.066436	0.1206	2.28715	0.862174	0.121405
15	2018	0	Hebei	1	0	0	0	1	0.79406	1.85897	3.97425	0.235818	0.552029	1.9851	1.374	0.640683	11.4185	0.0855	0.092142	0.073603	0.1735	2.34091	0.899647	0.118469
15	2019	0	Hebei	1	0	0	0	1	0.88899	1.97774	3.9699	0.122992	0.598257	2.30819	1.52351	0.687544	11.4389	0.0872	0.0937	0.07719	0.0703	4.86419	2.26641	0.154918
15	2020	1	Hebei	1	0	0	0	1	0.95688	2.05514	3.96529	0.121305	0.574022	2.43103	1.69042	0.68738	11.4586	0.09	0.073272	0.078682	0.1015	4.73205	2.51163	0.154853
16	2013	0	Hebei	1	0	0	0	1	0.4286	1.67	4.2607	0.62147	0.319033	0.715744	0.534899	0.256767	13.731	0.19	0.099239	0.063963	0.051	0.513353	0.095736	0.434144
16	2014	0	Hebei	1	0	0	0	1	0.47778	1.69125	4.25037	0.65721	0.289109	0.798019	0.574844	0.187088	13.7765	0.19	0.103839	0.080244	0.036	0.439904	0.08168	0.414172
16	2015	0	Hebei	1	0	0	0	1	0.53049	1.8424	4.24259	0.612177	0.326241	0.880711	0.689835	0.224279	13.229	0.19	0.104237	0.084777	0.036	0.53292	0.100595	0.264933
16	2016	0	Hebei	1	0	0	0	1	0.58586	1.99736	4.23475	0.535879	0.385658	1.07324	0.826757	0.338399	13.0783	0.08	0.115312	0.093398	0.1096	0.719673	0.146419	0.386142
16	2017	0	Hebei	1	0	0	0	1	0.65024	2.17185	4.22684	0.430889	0.492473	1.29029	0.885512	0.500899	12.953	0.08	0.117533	0.100278	0.1318	1.14292	0.177859	0.295577
16	2018	0	Hebei	1	0	0	0	1	0.74553	2.36056	4.21888	0.316921	0.587436	1.53455	0.944093	0.543678	12.8462	0.0811	0.119208	0.148137	0.1326	1.85357	0.301786	0.245964
16	2019	0	Hebei	1	0	0	0	1	0.83246	2.50902	4.21487	0.255898	0.630534	1.60207	1.03116	0.537987	12.7552	0.0856	0.122056	0.144558	0.0383	2.46401	0.443802	0.325735
16	2020	1	Hebei	1	0	0	0	1	0.91605	2.60855	4.21443	0.267962	0.608105	1.61968	0.97188	0.53401	12.6775	0.095	0.121145	0.151255	0.0383	2.26937	0.462504	0.245989
17	2013	0	Hebei	1	0	0	0	1	0.8379	1.96	4.29584	0.413693	0.255301	1.15722	0.510969	0.178976	12.7218	0.38	0.077971	0.061909	0.1494	0.617125	0.800125	0.256322
17	2014	0	Hebei	1	0	0	0	1	0.90413	1.95674	4.29584	0.400857	0.259302	1.22259	0.629479	0.177177	12.8204	0.38	0.080827	0.062814	0.1095	0.646869	0.847787	0.191897
17	2015	0	Hebei	1	0	0	0	1	0.98593	2.09585	4.29584	0.403148	0.28694	0.140001	0.780938	0.178398	12.8992	0.4	0.081875	0.068785	0.085	0.71175	0.768732	0.220118
17	2016	0	Hebei	1	0	0	0	1	1.07425	2.24703	4.31309	0.40062	0.280581	0.133829	0.830185	0.224485	12.7387	0.32	0.082457	0.096052	0.14	0.700368	0.795763	0.229276
17	2017	1	Hebei	1	0	0	0	1	1.16594	2.39024	4.2669	0.424682	0.339305	0.147395	1.14598	0.278094	12.6418	0.33	0.08403	0.106314	0.1447	0.798963	0.555742	0.18065
17	2018	1	Hebei	1	0	0	0	1	1.25931	2.52565	4.30322	0.414545	0.361165	1.53414	1.19662	0.245697	12.5898	0.31	0.087806	0.093171	0.1485	0.871233	0.541051	0.216639
17	2019	1	Hebei	1	0	0	0	1	1.36807	2.65496	4.31054	0.297971	0.469998	1.73053	1.2941	0.275856	12.5619	0.33	0.088905	0.096405	0.144	1.57733	0.778703	0.217579
17	2020	1	Hebei	1	0	0	0	1	1.45869	2.79013	4.30322	0.267464	0.492282	1.89147	1.32001	0.290981	12.5469	0.31	0.090065	0.104707	0.1805	1.84056	0.898269	0.217929
18	2013	0	Hebei	1	0	0	0	1	0.5242	1.63	4.97029	0.412435	0.328407	1.10321	0.436546	0.236653	14.1554	0.3	0.196305	0.107091	0.0608	0.796263	0.628361	0.154443
18	2014	0	Hebei	1	0	0	0	1	0.58761	1.67159	4.95508	0.403606	0.327608	1.18892	0.47418	0.212995	14.2032	0.31	0.196489	0.112362	0.0593	0.811702	0.665962	0.177836
18	2015	0	Hebei	1	0	0	0	1	0.64893	1.80341	4.93964	0.445659	0.316239	1.16247	0.473565	0.232354	14.2138	0.32	0.198788	0.118767	0.0593	0.709598	0.534268	0.169693
18	2016	0	Hebei	1	0	0	0	1	0.7179	1.95895	4.92395	0.43706	0.343919	1.20318	0.480223	0.224247	14.227	0.23	0.199842	0.147573	0.2732	0.786892	0.501122	0.191449
18	2017	0	Hebei	1	0	0	0	1	0.79188	2.11633	4.90801	0.44177	0.380038	1.24511	0.599727	0.215182	14.2375	0.23	0.201398	0.231788	0.2454	0.860264	0.403359	0.177375
18	2018	1	Hebei	1	0	0	0	1	0.86228	2.29196	4.89182	0.31593	0.473787	1.51633	0.822254	0.288902	14.2458	0.24	0.207519	0.248192	0.2094	1.49966	0.665599	0.209301
18	2019	1	Hebei	1	0	0	0	1	0.94552	2.46748	4.88568	0.190295	0.550742	1.8824	1.0693	0.338895	14.2525	0.25	0.208479	0.253711	0.071	2.89415	1.36085	0.227762
18	2020	1	Hebei	1	0	0	0	1	1.03393	2.60634	4.88267	0.167364	0.544246	2.023	1.11112	0.329954	14.2578	0.25	0.209235	0.286866	0.103	3.25186	1.72313	0.176691
19	2013	0	Hebei	1	0	0	0	1	0.4401	1.36	5.14313	0.39571	0.430843	1.26792	0.404153	0.20727	12.7587	0.54	0.222877	0.14305	0.0982	1.08879	0.43832	0.206114
19	2014	0	Hebei	1	0	0	0	1	0.49469	1.48476	5.15888	0.393908	0.439625	1.25628	0.47395	0.25656	12.839	0.55	0.268168	0.147954	0.0973	1.11606	0.422603	0.184097
19	2015	0	Hebei	1	0	0	0	1	0.55311	1.64744	5.17439	0.385064	0.449163	1.38854	0.519124	0.300897	12.8732	0.58	0.291897	0.148506	0.0645	1.16646	0.430507	0.172622
19	2016	0	Hebei	1	0	0	0	1	0.61246	1.7861	5.17423	0.418869	0.425963	1.56668	0.529196	0.288769	12.8525	0.39	0.307277	0.188587	0.216	1.01693	0.370445	0.178017
19	2017	0	Hebei	1	0	0	0	1	0.67677	1.92637	5.07108	0.37047	0.494885	1.57397	0.478388	0.251829	12.8714	0.43	0.319993	0.231445	0.2299	1.33583	0.363445	0.188913
19	2018	0	Hebei	1	0	0	0	1	0.74747	2.08055	5.18205	0.342754	0.517088	1.68771	0.471415	0.326295	12.8888	0.45	0.337062	0.268897	0.2185	1.50863	0.408919	0.149754
19	2019	1	Hebei	1	0	0	0	1	0.83246	2.22564	5.18965	0.272642	0.584474	1.8629	0.530653	0.315501	12.9046	0.48	0.346069	0.282386	0.1032	2.14374	0.524071	0.160955
19	2020	1	Hebei	1	0	0	0	1	0.89582	2.39286	5.18373	0.27509	0.579107	2.03348	0.573485	0.301739	12.919	0.47	0.348302	0.314075	0.1563	2.10515	0.530018	0.178296
20	2013	0	Hebei	1	0	0	0	1	0.4368	1.8	4.38439	0.411136	0.250412	1.19811	0.596528	0.211768	13.0929	0.42	0.096015	0.062667	0.1525	0.609074	0.823213	0.192124
20	2014	0	Hebei	1	0	0	0	1	0.48201	1.83875	4.38777	0.41129	0.246581	1.29015	0.531402	0.214962	13.2125	0.42	0.099277	0.083912	0.1519	0.599531	0.831842	0.206931
20	2015	0	Hebei	1	0	0	0	1	0.52845	2.01787	4.39115	0.39186	0.247524	1.30909	0.566425	0.240827	13.2128	0.39	0.101808	0.093042	0.0612	0.631664	0.920269	0.256235
20	2016	0	Hebei	1	0	0	0	1	0.58096	2.17981	4.4012	0.35666	0.251135	1.3714	0.591219	0.255686	13.1336	0.24	0.102097	0.101552	0.1612	0.704131	1.09966	0.212576
20	2017	0	Hebei	1	0	0	0	1	0.64427	2.3478	4.40419	0.326587	0.326533	1.63748	0.756174	0.30381	13.2517	0.25	0.101459	0.110687	0.1924	0.999833	1.06214	0.249623
20	2018	0	Hebei	1	0	0	0	1	0.74294	2.51512	4.40784	0.318113	0.341042	1.66252	0.833201	0.335798	13.2861	0.2634	0.100224	0.110838	0.1956	1.07208	1.07146	0.227512
20	2019	1	Hebei	1	0	0	0	1	0.80925	2.65614	4.4012	0.201658	0.474331	1.59928	0.88637	0.312435	13.2961	0.2805	0.08723	0.116265	0.0862	2.35216	1.60674	0.23115
20	2020	1	Hebei	1	0	0	0	1	0.87585	2.76345	4.29213	0.213539	0.467491	1.66111	0.867201	0.357627	13.299	0.28	0.098441	0.12278	0.1225	2.18925	1.49373	0.199759
21	2013	0	Hebei	1	0	0	0	1	0.57	1.87	4.09104	0.453435	0.339878	0.713822	0.760455	0.169282	12.9817	0.13	0.061903	0.056859	0.1084	0.749563	0.455824	0.312104
21	2014	0	Hebei	1	0	0	0	1	0.63275	2.04524	4.09104	0.475481	0.333144	0.759667	0.833418	0.185381	13.6456	0.14	0.063838	0.063084	0.1084	0.700647	0.402488	0.327695
21	2015	0	Hebei	1	0	0	0	1	0.70382	2.23233	4.13549	0.464749	0.354541	0.897069	0.858499	0.233263	13.6694	0.14	0.064565	0.067094	0.1137	0.762867	0.388834	0.300317
21	2016	0	Hebei	1	0	0	0	1	0.7807	2.41988	4.11751	0.483988	0.348726	0.942823	0.840664	0.253708	13.6819	0.09	0.065435	0.077245	0.1203	0.720526	0.345641	0.244213
21	2017	0	Hebei	1	0	0	0	1	0.86038	2.63459	4.10324	0.465823	0.399387	1.15572	0.937286	0.317829	13.6619	0.09	0.065582	0.09068	0.1133	0.85738	0.289358	0.19945
21	2018	0	Hebei	1	0	0	0	1	0.94936	2.82756	4.11352	0.401852	0.453649	0.673731	0.632147	0.404797	13.6663	0.097	0.066674	0.096251	0.0711	1.1289	0.359582	0.16694
21	2019	1	Hebei	1	0	0	0	1	1.05452	3.02477	4.11352	0.312291	0.541086	0.711376	0.642722	0.325685	13.6653	0.124	0.067886	0.094191	0.084	1.73263	0.469504	0.201966
21	2020	1	Hebei	1	0	0	0	1	1.15287	3.23221	4.11263	0.290383	0.548781	0.788783	0.701623	0.29915	13.6655	0.13	0.064342	0.088367	0.1149	1.88985	0.553878	0.234293
22	2013	0	Hebei	1	0	0	0	1	0.6011	1.85	3.362	0.55297	0.21194	0.609366	0.520123	0.299004	12.8418	0.09	0.022422	0.022161	0.1017	0.383276	0.42514	0.305056
22	2014	0	Hebei	1	0	0	0	1	0.67257	2.14357	3.36106	0.546781	0.21917	0.688706	0.723118	0.381492	12.6007	0.09	0.023334	0.026847	0.1089	0.400837	0.428049	0.285818
22	2015	0	Hebei	1	0	0	0	1	0.75012	2.34931	3.36012	0.4893	0.254309	0.837741	0.970107	0.415586	12.1717	0.09	0.022511	0.030114	0.1155	0.51974	0.523995	0.308294
22	2016	0	Hebei	1	0	0	0	1	0.8313	2.54471	3.35917	0.431706	0.308913	1.26797	1.87825	0.622471	11.8074	0.07	0.022218	0.031177	0.1297	0.715564	0.600827	0.208929
22	2017	0	Hebei	1	0	0	0	1	0.91704	2.78277	3.35823	0.469994	0.368785	1.80655	2.53263	0.640556	11.6029	0.07	0.021265	0.030485	0.1222	0.784658	0.343029	0.23292
22	2018	0	Hebei	1	0	0	0	1	1.0039	2.98924	3.35728	0.439165	0.392522	2.34123	3.20076	0.912288	11.4768	0.072	0.019674	0.03515	0.107	0.893793	0.383258	0.166045
22	2019	1	Hebei	1	0	0	0	1	1.09453	3.21821	3.35633	0.263653	0.567864	2.94122	4.03726	1.11445	11.399	0.0734	0.019212	0.0345	0.0464	2.15383	0.639032	0.157161
22	2020	1	Hebei	1	0	0	0	1	1.21092	3.4631	3.35614	0.238782	0.586004	3.32888	4.60075	0.875394	11.3509	0.08	0.018477	0.033735	0.0544	2.45414	0.733783	0.217617
23	2013	0	Hebei	1	0	0	0	1	0.6097	1.77	4.39451	0.478223	0.233201	0.638597	1.26003	0.2422	13.3087	0.38	0.082139	0.098079	0.2347	0.487642	0.603435	0.297369
23	2014	0	Hebei	1	0	0	0	1	0.67444	1.88791	4.39971	0.473053	0.267001	0.661185	1.23913	0.242185	13.4148	0.39	0.082452	0.095557	0.242	0.564421	0.549505	0.309704
23	2015	0	Hebei	1	0	0	0	1	0.7469	2.06661	4.40488	0.507654	0.253441	0.735838	1.19807	0.264682	13.5341	0.41	0.08805	0.108579	0.322	0.49924	0.470607	0.294682
23	2016	0	Hebei	1	0	0	0	1	0.82477	2.24703	4.41003	0.495099	0.279846	0.811548	1.1753	0.256373	13.4889	0.34	0.120036	0.12502	0.3331	0.565231	0.454565	0.275049
23	2017	0	Hebei	1	0	0	0	1	0.90823	2.46272	4.41515	0.479859	0.286982	0.944684	1.30489	0.274757	13.6946	0.36	0.129237	0.130924	0.1764	0.598054	0.485892	0.246741
23	2018	0	Hebei	1	0	0	0	1	1.00141	2.64786	4.42025	0.46627	0.2935	0.979279	1.451	0.292909	13.9002	0.3668	0.131974	0.16161	0.1744	0.629463	0.515217	0.208703
23	2019	0	Hebei	1	0	0	0	1	1.11521	2.84542	4.42532	0.329426	0.369555	1.12308	1.8262	0.334725	14.1058	0.3645	0.137224	0.159751	0.1085	1.12182	0.913771	0.206276
23	2020	1	Hebei	1	0	0	0	1	1.21984	3.05955	4.43037	0.326047	0.399254	1.34836	2.36075	0.381029	14.3114	0.37	0.139928	0.171182	0.048	1.22453	0.842514	0.188578
24	2013	0	Hebei	1	0	0	0	1	0.5787	1.69	3.99573	0.258685	0.273606	0.52355	0.312782	0.309329	11.7665	0.32	0.036586	0.037765	0.1881	1.05768	1.80802	0.113584
24	2014	0	Hebei	1	0	0	0	1	0.64641	1.79942	3.94444	0.274577	0.268465	0.574632	0.393869	0.335133	11.8274	0.33	0.03558	0.037734	0.2381	0.97774	1.66422	0.123334
24	2015	0	Hebei	1	0	0	0	1	0.71327	1.96913	3.89037	0.261069	0.280285	0.660997	0.498661	0.372201	11.9228	0.33	0.034522	0.04494	0.1954	1.0736	1.7568	0.118562
24	2016	0	Hebei	1	0	0	0	1	0.77926	2.1318	3.83321	0.271787	0.28452	0.698735	0.591778	0.355603	11.9693	0.26	0.034816	0.052141	0.1904	1.04685	1.6325	0.211736
24	2017	0	Hebei	1	0	0	0	1	0.84731	2.28953	3.77259	0.378028	0.296037	0.796208	0.760147	0.466207	12.0396	0.27	0.034993	0.056828	0.1995	0.783108	0.862201	0.101799
24	2018	0	Hebei	1	0	0	0	1	0.92292	2.4371	3.70805	0.37536	0.294856	0.869389	0.745573	0.606862	12.1	0.2776	0.03146	0.063021	0.3182	0.785526	0.878579	0.078617
24	2019	0	Hebei	1	0	0	0	1	1.01885	2.60475	3.63906	0.301061	0.336327	0.92751	0.742706	0.625524	12.1518	0.2798	0.030392	0.066368	0.0421	1.11714	1.20445	0.097712
24	2020	1	Hebei	1	0	0	0	1	1.11673	2.78722	3.62615	0.307552	0.31635	1.04388	0.80054	0.627729	12.1964	0.28	0.029076	0.068054	0.0398	1.02861	1.22288	0.108881
25	2013	0	Hebei	1	0	0	0	1	0.5736	1.66	3.80336	0.287048	0.260043	0.610602	0.500687	0.335417	11.6197	0.46	0.047051	0.038263	0.1199	0.905919	1.57781	0.173133
25	2014	0	Hebei	1	0	0	0	1	0.6413	1.83875	3.80681	0.30943	0.269709	0.689896	0.559903	0.357192	11.6587	0.47	0.047549	0.03864	0.1199	0.871631	1.36012	0.180738
25	2015	0	Hebei	1	0	0	0	1	0.7121	2.00812	3.81025	0.283913	0.280134	0.76994	0.675386	0.399204	11.791	0.48	0.048169	0.03895	0.1199	0.986687	1.53551	0.174496
25	2016	0	Hebei	1	0	0	0	1	0.79126	2.17981	3.81367	0.322397	0.278844	0.836873	0.761009	0.430373	12.0002	0.43	0.046799	0.044673	0.0969	0.864907	1.23686	0.137497
25	2017	0	Hebei	1	0	0	0	1	0.87365	2.37963	3.81708	0.340044	0.273175	0.896986	0.811875	0.443263	12.2699	0.44	0.049805	0.045114	0.111	0.803353	1.13744	0.123567
25	2018	0	Hebei	1	0	0	0	1	0.96748	2.56097	3.82049	0.317731	0.268652	1.00539	0.827535	0.494761	12.5396	0.4582	0.046188	0.051418	0.111	0.845533	1.30178	0.106544
25	2019	0	Hebei	1	0	0	0	1	1.06518	2.73208	3.82388	0.283126	0.316833	1.04105	0.877975	0.520736	12.8093	0.4695	0.04489	0.052497	0.0228	1.11905	1.41294	0.10379
25	2020	1	Hebei	1	0	0	0	1	1.1731	2.89343	3.77879	0.255927	0.313164	1.23179	0.975694	0.536312	13.0789	0.47	0.048471	0.052372	0.0287	1.22365	1.68372	0.112834
26	2013	0	Hebei	1	0	0	0	1	0.5287	1.6	3.70805	0.402953	0.272421	0.661819	0.455351	0.330266	12.3553	0.1	0.03169	0.046715	0.0987	0.676062	0.805619	0.109134
26	2014	0	Hebei	1	0	0	0	1	0.5885	1.71092	3.66375	0.4242	0.265375	0.713043	0.508785	0.348957	12.4655	0.11	0.030724	0.046401	0.1363	0.62559	0.731788	0.11488
26	2015	0	Hebei	1	0	0	0	1	0.64884	1.85215	3.6174	0.397076	0.279104	0.847395	0.529944	0.412537	12.5268	0.11	0.029417	0.046724	0.1363	0.702897	0.815511	0.106424
26	2016	0	Hebei	1	0	0	0	1	0.71521	1.99736	3.56879	0.388811	0.281841	0.935186	0.621353	0.39946	12.4629	0.11	0.029716	0.051703	0.1012	0.724878	0.847066	0.114829
26	2017	0	Hebei	1	0	0	0	1	0.78544	2.16636	3.5177	0.398222	0.306996	1.05777	0.778011	0.513349	12.4808	0.12	0.027541	0.071147	0.1297	0.770918	0.740247	0.100386
26	2018	0	Hebei	1	0	0	0	1	0.86515	2.32497	3.46385	0.333196	0.332122	1.19717	0.938849	0.629117	12.496	0.1275	0.031722	0.068563	0.1379	0.996776	1.00446	0.080931
26	2019	0	Hebei	1	0	0	0	1	0.95175	2.48717	3.40694	0.276301	0.352579	1.26232	0.915939	0.726097	12.509	0.1605	0.028759	0.059649	0.0619	1.27607	1.34318	0.07924
26	2020	1	Hebei	1	0	0	0	1	1.04241	2.65874	3.34418	0.246319	0.303814	1.27567	0.990319	0.672015	12.5202	0.17	0.025377	0.059919	0.0476	1.23342	1.82636	0.087121
27	2013	0	Hebei	1	0	0	0	1	0.5826	1.93	4.80666	0.307534	0.509964	1.27785	0.760311	0.252673	12.5487	0.35	0.163074	0.093023	0.1798	1.65824	0.593434	0.278765
27	2014	0	Hebei	1	0	0	0	1	0.65369	2.10423	4.79448	0.302846	0.504154	1.46095	0.832556	0.246583	12.5206	0.37	0.177679	0.092771	0.1798	1.66472	0.637285	0.255798
27	2015	0	Hebei	1	0	0	0	1	0.72575	2.30056	4.78214	0.247995	0.553073	1.70785	1.10675	0.328328	12.3778	0.39	0.185849	0.088316	0.2138	2.23017	0.802161	0.195136
27	2016	0	Hebei	1	0	0	0	1	0.80221	2.4967	4.76965	0.234412	0.578246	1.76701	1.16018	0.294459	12.3821	0.23	0.187501	0.11847	0.207	2.46679	0.7992	0.262063
27	2017	0	Hebei	1	0	0	0	1	0.88009	2.70593	4.75701	0.236861	0.605947	1.98194	1.3484	0.355544	12.3651	0.25	0.181776	0.121233	0.1377	2.55823	0.663645	0.181342
27	2018	0	Hebei	1	0	0	0	1	0.96258	2.88571	4.7442	0.196332	0.643745	2.02679	1.45582	0.370655	12.3538	0.2651	0.17836	0.16323	0.1475	3.27887	0.814554	0.174206
27	2019	0	Hebei	1	0	0	0	1	1.05787	3.05873	4.73122	0.180417	0.641636	2.47459	1.73122	0.453624	12.3462	0.2732	0.174964	0.164115	0.048	3.55641	0.98631	0.149038
27	2020	1	Hebei	1	0	0	0	1	1.12477	3.23036	4.71801	0.16267	0.657496	2.75628	1.82149	0.485656	12.3412	0.27	0.169417	0.167791	0.0477	4.0419	1.10551	0.147275
28	2013	0	Hebei	1	0	0	0	1	0.5475	1.56	4.21888	0.231688	0.571164	0.880457	0.701659	0.227773	11.6243	0.12	0.074225	0.050273	0.1323	2.46523	0.850922	0.20806
28	2014	0	Hebei	1	0	0	0	1	0.60944	1.63226	4.19335	0.302523	0.417418	1.287	1.26014	0.307189	11.9003	0.13	0.076161	0.050391	0.1323	1.37979	0.925745	0.197485
28	2015	0	Hebei	1	0	0	0	1	0.67136	1.77416	4.16716	0.289529	0.443555	1.48901	1.31123	0.376549	11.7968	0.16	0.081147	0.055943	0.1095	1.53199	0.921895	0.175921
28	2016	0	Hebei	1	0	0	0	1	0.74066	1.92054	4.14027	0.307916	0.429851	1.53389	1.48146	0.402293	11.7268	0.11	0.078686	0.062239	0.1095	1.396	0.851637	0.163261
28	2017	0	Hebei	1	0	0	0	1	0.81775	2.09842	4.11263	0.316628	0.472583	1.67735	1.67303	0.481442	11.7872	0.11	0.06888	0.06421	0.0872	1.49255	0.665729	0.147469
28	2018	0	Hebei	1	0	0	0	1	0.89353	2.24399	4.0842	0.248557	0.521456	1.91242	1.83842	0.587451	11.7719	0.1202	0.065311	0.064772	0.0708	2.09793	0.925289	0.133616
28	2019	0	Hebei	1	0	0	0	1	0.99429	2.40923	4.05494	0.255921	0.500916	2.02294	1.87669	0.643309	11.7758	0.1262	0.071003	0.065227	0.062	1.95731	0.95015	0.11935
28	2020	1	Hebei	1	0	0	0	1	1.06866	2.5884	4.02419	0.271496	0.502713	2.26163	1.91387	0.649566	11.7748	0.12	0.067955	0.069147	0.069	1.85164	0.831652	0.12701
29	2013	0	Hebei	1	0	0	0	1	0.6294	1.77	4.04452	0.309832	0.501608	0.713118	0.466343	0.17926	12.9698	0.11	0.056517	0.038007	0.3104	1.61897	0.608587	0.295166
29	2014	0	Hebei	1	0	0	0	1	0.7	1.85841	4.02387	0.335223	0.473743	0.846976	0.559634	0.200118	13.0612	0.12	0.059534	0.038007	0.2254	1.41322	0.569869	0.262419
29	2015	0	Hebei	1	0	0	0	1	0.77449	2.02762	4.00278	0.321092	0.493808	1.20237	0.600135	0.265038	13.0847	0.12	0.052485	0.046436	0.2291	1.5379	0.576473	0.224583
29	2016	0	Hebei	1	0	0	0	1	0.84993	2.17981	3.98123	0.324719	0.519773	1.02362	0.666439	0.262275	13.1345	0.08	0.061262	0.051965	0.2671	1.60069	0.4789	0.231574
29	2017	0	Hebei	1	0	0	0	1	0.93419	2.37186	3.95921	0.326449	0.541924	1.17577	0.814906	0.33379	13.1813	0.08	0.051509	0.06241	0.1963	1.66005	0.403208	0.21164
29	2018	0	Hebei	1	0	0	0	1	1.01906	2.53628	3.9367	0.458379	0.433464	0.972469	0.972279	0.260274	13.2189	0.0811	0.061502	0.061276	0.2161	0.945646	0.235956	0.280241
29	2019	0	Hebei	1	0	0	0	1	1.11404	2.71565	3.91367	0.605738	0.287874	1.07422	1.11882	0.270209	13.249	0.0846	0.059462	0.060893	0.0418	0.475244	0.175633	0.348038
29	2020	1	Hebei	1	0	0	0	1	1.19634	2.9096	3.89009	0.59629	0.308314	1.26125	1.08209	0.280209	13.2732	0.09	0.059476	0.065557	0.1089	0.517053	0.159983	0.209269
30	2013	0	Hebei	1	0	0	0	1	0.598	1.71	4.4012	0.492181	0.234998	0.807033	0.613179	0.235876	13.4925	0.24	0.06858	0.049176	0.1605	0.477461	0.55431	0.352103
30	2014	0	Hebei	1	0	0	0	1	0.67621	2.02557	4.4012	0.490692	0.217831	0.821965	0.729651	0.205193	13.5015	0.25	0.072747	0.049766	0.2678	0.443926	0.594012	0.309049
30	2015	0	Hebei	1	0	0	0	1	0.75285	2.22258	4.4012	0.476408	0.231924	0.912329	0.800746	0.220794	13.4919	0.25	0.076073	0.05434	0.2408	0.486818	0.612224	0.193577
30	2016	0	Hebei	1	0	0	0	1	0.83284	2.40067	4.39853	0.395499	0.272377	1.08061	0.987502	0.269345	13.2023	0.11	0.078349	0.062944	0.2334	0.688692	0.839758	0.179964
30	2017	0	Hebei	1	0	0	0	1	0.90965	2.58684	4.22883	0.27172	0.364928	1.44697	1.2911	0.374471	13.2143	0.11	0.077832	0.069129	0.2496	1.34303	1.33723	0.164672
30	2018	0	Hebei	1	0	0	0	1	0.9905	2.74603	4.38099	0.194386	0.419133	1.70869	1.382	0.464455	13.2245	0.1117	0.064048	0.074042	0.2152	2.15619	1.98822	0.198761
30	2019	0	Hebei	1	0	0	0	1	1.0818	2.91342	4.37759	0.131792	0.448286	1.93322	1.39898	0.445481	13.2334	0.1163	0.062852	0.074137	0.088	3.40148	3.18626	0.248939
30	2020	1	Hebei	1	0	0	0	1	1.16294	3.08553	4.36246	0.122743	0.43359	2.10071	1.38416	0.470432	13.241	0.12	0.060663	0.074214	0.0605	3.5325	3.61459	0.243439
31	2013	0	Hebei	1	0	0	0	1	0.6519	1.82	4.63759	0.520567	0.278911	0.759091	0.557176	0.178422	14.2198	0.3	0.108691	0.11871	0.7224	0.535782	0.385199	0.422978
31	2014	0	Hebei	1	0	0	0	1	0.72517	1.92724	4.62266	0.507244	0.274226	0.772987	0.606851	0.173187	14.2966	0.31	0.114647	0.122219	0.158	0.540621	0.430819	0.440118
31	2015	0	Hebei	1	0	0	0	1	0.79438	2.07636	4.60751	0.468576	0.308694	0.900191	0.676997	0.185698	14.1747	0.33	0.117665	0.127766	0.152	0.658791	0.475334	0.329202
31	2016	0	Hebei	1	0	0	0	1	0.86415	2.22782	4.59212	0.438519	0.326932	0.901284	0.760595	0.190879	14.1796	0.16	0.119984	0.144746	0.9778	0.745538	0.534866	0.240286
31	2017	0	Hebei	1	0	0	0	1	0.94471	2.40606	4.57649	0.36856	0.377897	1.04974	0.991798	0.211235	14.1983	0.16	0.125746	0.183412	0.8518	1.02533	0.687928	0.246974
31	2018	0	Hebei	1	0	0	0	1	1.02775	2.56818	4.56062	0.29404	0.409832	1.18024	1.15513	0.244866	14.2161	0.16	0.134271	0.187506	0.9108	1.3938	1.0071	0.22845
31	2019	1	Hebei	1	0	0	0	1	1.11846	2.73976	4.54449	0.233549	0.440886	1.31952	1.22747	0.235258	14.233	0.17	0.142077	0.188511	0.1425	1.88777	1.39399	0.24841
31	2020	1	Hebei	1	0	0	0	1	1.23672	2.93231	4.52806	0.217686	0.429327	1.47485	1.27034	0.251631	14.249	0.18	0.151024	0.194952	0.11	1.97223	1.62154	0.239348
32	2013	0	Hebei	1	0	0	0	1	0.5725	2	4.3322	0.575658	0.256605	0.49649	0.436163	0.137134	14.5787	0.42	0.099999	0.094688	0.4728	0.445759	0.291383	0.395933
32	2014	0	Hebei	1	0	0	0	1	0.63275	2.0649	4.3264	0.576934	0.263804	0.526957	0.538816	0.151504	14.6587	0.45	0.102123	0.0991	0.3897	0.457251	0.276049	0.385024
32	2015	0	Hebei	1	0	0	0	1	0.69758	2.24208	4.32056	0.54777	0.286293	0.557064	0.626717	0.146634	14.5668	0.46	0.104614	0.103944	0.382	0.522653	0.302932	0.288243
32	2016	0	Hebei	1	0	0	0	1	0.771	2.41027	4.31468	0.511123	0.311259	0.535411	0.674988	0.136576	14.5825	0.31	0.105581	0.138206	0.3797	0.608971	0.347506	0.259882
32	2017	0	Hebei	1	0	0	0	1	0.84665	2.59745	4.30877	0.445609	0.393356	0.792155	0.943667	0.18705	14.5985	0.31	0.107806	0.156392	0.366	0.882738	0.361382	0.271186
32	2018	0	Hebei	1	0	0	0	1	0.93513	2.77755	4.30283	0.393116	0.429243	0.894913	1.08918	0.228174	14.6096	0.3131	0.10971	0.162483	0.3597	1.0919	0.45188	0.290532
32	2019	1	Hebei	1	0	0	0	1	1.0305	2.98756	4.29685	0.359993	0.427234	0.996554	1.11988	0.234893	14.6173	0.3135	0.111499	0.164459	0.2029	1.18678	0.591045	0.322681
32	2020	1	Hebei	1	0	0	0	1	1.11787	3.22665	4.29081	0.351978	0.419593	1.04905	1.10981	0.223458	14.6226	0.31	0.110351	0.154635	0.2544	1.1921	0.648984	0.324549
33	2013	0	Hebei	1	0	0	0	1	0.5244	1.76	4.61092	0.484012	0.255285	0.6949	0.588209	0.199797	13.7476	0.53	0.118279	0.090949	0.3343	0.527434	0.538629	0.304456
33	2014	0	Hebei	1	0	0	0	1	0.58063	1.84858	4.60229	0.470244	0.262618	0.74557	0.614288	0.189557	13.936	0.55	0.123896	0.105894	0.2203	0.558472	0.568083	0.236173
33	2015	0	Hebei	1	0	0	0	1	0.63948	1.99837	4.59358	0.445845	0.281409	0.83954	0.682471	0.211623	13.8744	0.58	0.129003	0.109041	0.2086	0.631181	0.611753	0.178572
33	2016	0	Hebei	1	0	0	0	1	0.69667	2.1318	4.5848	0.395652	0.328197	0.84936	0.778054	0.212181	13.8259	0.3	0.131573	0.150185	0.269	0.829509	0.697963	0.155022
33	2017	0	Hebei	1	0	0	0	1	0.76441	2.2774	4.57593	0.332218	0.367103	0.945186	0.845057	0.234184	13.8172	0.3	0.135786	0.174037	0.2791	1.10501	0.905067	0.129645
33	2018	0	Hebei	1	0	0	0	1	0.84056	2.42637	4.56699	0.277058	0.399037	1.04036	1.026	0.297244	13.8092	0.3103	0.141658	0.19499	0.2815	1.44027	1.16909	0.120686
33	2019	0	Hebei	1	0	0	0	1	0.92466	2.58371	4.55797	0.214583	0.443987	1.07146	1.01782	0.309434	13.802	0.3156	0.145117	0.19617	0.1777	2.06907	1.59114	0.115251
33	2020	1	Hebei	1	0	0	0	1	1.00981	2.75267	4.54878	0.18679	0.445509	1.14416	0.998862	0.298411	13.7954	0.31	0.142662	0.196571	0.1919	2.38508	1.96853	0.132081
34	2013	0	Hebei	1	0	0	0	1	0.506	1.51	4.55535	0.430341	0.320566	0.82774	0.6454	0.273248	13.5208	0.56	0.12108	0.109822	0.3205	0.744913	0.578828	0.226892
34	2014	0	Hebei	1	0	0	0	1	0.54513	1.66176	4.54567	0.418301	0.331924	0.896004	0.81337	0.280179	13.5726	0.61	0.129493	0.123202	0.2445	0.793506	0.597119	0.257701
34	2015	0	Hebei	1	0	0	0	1	0.59971	1.79366	4.5359	0.388957	0.358612	0.945414	1.10216	0.294463	13.4555	0.64	0.132364	0.133103	0.2489	0.921983	0.648994	0.299485
34	2016	0	Hebei	1	0	0	0	1	0.65577	1.92054	4.52604	0.383223	0.361185	0.959568	1.30665	0.306323	13.5203	0.45	0.133374	0.150036	0.2428	0.942495	0.666955	0.217151
34	2017	0	Hebei	1	0	0	0	1	0.72139	2.05655	4.51607	0.373483	0.40767	1.03613	1.53063	0.354347	13.5341	0.47	0.134351	0.173443	0.2489	1.09154	0.585962	0.165986
34	2018	0	Hebei	1	0	0	0	1	0.78833	2.18714	4.50601	0.369939	0.409851	1.13431	1.69378	0.361354	13.5432	0.4881	0.136169	0.180635	0.252	1.10789	0.595258	0.179174
34	2019	0	Hebei	1	0	0	0	1	0.86569	2.32678	4.49584	0.280822	0.471155	1.2946	1.80856	0.47735	13.5492	0.4981	0.139153	0.186259	0.083	1.67777	0.8832	0.158068
34	2020	1	Hebei	1	0	0	0	1	0.95043	2.45639	4.48539	0.307759	0.436078	1.35762	1.86393	0.421113	13.5533	0.5	0.141714	0.190139	0.08	1.41694	0.83235	0.140907
35	2013	0	Hebei	1	0	0	0	1	0.509	1.57	4.741	0.257957	0.305761	0.824268	0.727035	0.263576	12.6352	0.7	0.170165	0.122675	0.3087	1.18532	1.6913	0.147418
35	2014	0	Hebei	1	0	0	0	1	0.5646	1.73059	4.7433	0.247548	0.321218	0.892015	0.769224	0.261588	12.7764	0.75	0.175237	0.128737	0.2383	1.2976	1.74202	0.174025
35	2015	0	Hebei	1	0	0	0	1	0.62242	1.87165	4.74559	0.237646	0.334338	0.943647	0.78744	0.292451	12.8832	0.78	0.182887	0.128863	0.2088	1.40687	1.80106	0.179594
35	2016	0	Hebei	1	0	0	0	1	0.68544	1.99736	4.74788	0.268664	0.352861	0.991047	0.89046	0.300213	12.8729	0.63	0.190279	0.15749	0.1947	1.31339	1.40873	0.14391
35	2017	0	Hebei	1	0	0	0	1	0.75474	2.14532	4.75016	0.269598	0.373572	1.0408	0.908705	0.29597	12.799	0.67	0.197701	0.197915	0.2302	1.38566	1.32356	0.147221
35	2018	0	Hebei	1	0	0	0	1	0.83215	2.28355	4.75244	0.258822	0.375768	1.05372	0.980048	0.311247	12.7439	0.6877	0.205443	0.210759	0.2991	1.45184	1.41182	0.13342
35	2019	0	Hebei	1	0	0	0	1	0.91374	2.4384	4.75701	0.238061	0.388582	1.11606	0.976399	0.317516	12.7028	0.7177	0.212789	0.212595	0.1691	1.63228	1.56833	0.123345
35	2020	1	Hebei	1	0	0	0	1	1.00141	2.60475	4.74644	0.238582	0.381227	1.25098	1.03817	0.369663	12.6721	0.73	0.210869	0.221607	0.1489	1.59789	1.59355	0.103704
36	2013	0	Hebei	1	0	0	0	1	0.7299	1.83	4.80888	0.443081	0.282598	0.751427	0.532257	0.176901	14.2016	0.49	0.154809	0.097648	0.2572	0.637802	0.619123	0.373438
36	2014	0	Hebei	1	0	0	0	1	0.806	1.96657	4.8111	0.432666	0.291828	0.811465	0.601676	0.168082	14.2225	0.52	0.155582	0.104267	0.2264	0.674488	0.636765	0.386505
36	2015	0	Hebei	1	0	0	0	1	0.88289	2.1251	4.8111	0.429	0.374	0.86865	0.629023	0.167973	14.0452	0.54	0.157285	0.103765	0.2554	0.871794	0.459207	0.237812
36	2016	0	Hebei	1	0	0	0	1	0.95931	2.28544	4.8111	0.424479	0.377894	0.836478	0.694735	0.17744	14.1221	0.33	0.160546	0.147498	0.2658	0.890254	0.465574	0.198992
36	2017	0	Hebei	1	0	0	0	1	1.05537	2.45969	4.81287	0.394385	0.419595	0.985713	0.852417	0.196023	14.1384	0.33	0.162793	0.168425	0.2848	1.06392	0.47167	0.191157
36	2018	1	Hebei	1	0	0	0	1	1.15837	2.63261	4.81771	0.348048	0.441263	1.12379	0.991531	0.198033	14.1533	0.34	0.165204	0.183673	0.3002	1.26782	0.605342	0.197085
36	2019	1	Hebei	1	0	0	0	1	1.27307	2.82907	4.7612	0.207952	0.484871	1.71311	1.55381	0.248475	14.167	0.34	0.166101	0.192734	0.2127	2.33165	1.47716	0.188954
36	2020	1	Hebei	1	0	0	0	1	1.41636	3.03525	4.68638	0.17024	0.500979	1.8315	1.61994	0.25939	14.1795	0.34	0.164984	0.201585	0.2344	2.94278	1.93128	0.183651
37	2013	0	Hebei	1	0	0	0	1	0.4666	1.72	3.99072	0.450761	0.347583	0.958343	0.510963	0.290774	12.0827	0.38	0.059451	0.042031	0.0589	0.771102	0.447368	0.256622
37	2014	0	Hebei	1	0	0	0	1	0.52272	1.82891	3.98568	0.4513	0.355441	1.06487	0.47951	0.270219	12.2853	0.39	0.062347	0.043937	0.0569	0.787595	0.428227	0.267273
37	2015	0	Hebei	1	0	0	0	1	0.58762	2.02762	3.97553	0.460403	0.36542	1.17157	0.631936	0.339449	12.1288	0.41	0.065092	0.066711	0.0569	0.793697	0.378313	0.220925
37	2016	0	Hebei	1	0	0	0	1	0.64597	2.22782	3.96527	0.476012	0.351999	1.19413	0.745372	0.351766	12.3216	0.34	0.068078	0.083061	0.1377	0.739475	0.361311	0.199458
37	2017	1	Hebei	1	0	0	0	1	0.71457	2.44425	3.96011	0.486728	0.368062	1.29089	0.816291	0.32496	12.4294	0.35	0.080658	0.087073	0.1325	0.756198	0.298339	0.242706
37	2018	1	Hebei	1	0	0	0	1	0.80035	2.64231	3.94969	0.415536	0.406197	1.42521	0.88052	0.370014	12.5371	0.3709	0.081914	0.079024	0.1172	0.977525	0.429004	0.243106
37	2019	1	Hebei	1	0	0	0	1	0.88122	2.84732	3.94969	0.25784	0.524126	1.56121	1.19759	0.382693	12.6448	0.3765	0.087478	0.079685	0.026	2.03276	0.845619	0.253733
37	2020	1	Hebei	1	0	0	0	1	0.95405	3.06238	3.93916	0.261772	0.526957	1.53755	1.22776	0.341118	12.7524	0.38	0.084841	0.079905	0.037	2.01304	0.807076	0.261681
38	2013	0	Hebei	1	0	0	0	1	0.5846	1.94	4.80666	0.679794	0.191312	0.565521	0.47261	0.119301	15.3437	0.63	0.139017	0.095469	0.0424	0.281426	0.189607	0.279094
38	2014	0	Hebei	1	0	0	0	1	0.65212	2.0354	4.79432	0.619208	0.267808	0.575005	0.473383	0.115327	15.5051	0.65	0.1504	0.099476	0.0654	0.432502	0.182466	0.279586
38	2015	0	Hebei	1	0	0	0	1	0.73053	2.25182	4.78182	0.612236	0.279006	0.651522	0.501958	0.14077	15.5999	0.66	0.163988	0.105945	0.0765	0.455716	0.177641	0.243116
38	2016	0	Hebei	1	0	0	0	1	0.80096	2.45829	4.76917	0.64877	0.260425	0.635484	0.491728	0.126333	15.6587	0.42	0.161107	0.118971	0.1283	0.401413	0.139965	0.23452
38	2017	0	Hebei	1	0	0	0	1	0.87204	2.65581	4.75635	0.615853	0.316526	0.700865	0.570859	0.177819	15.7092	0.44	0.163173	0.125349	0.1764	0.513964	0.109801	0.191288
38	2018	1	Hebei	1	0	0	0	1	0.97423	2.79595	4.74337	0.516434	0.399771	1.02899	0.768196	0.218626	15.7542	0.4508	0.163198	0.133576	0.1563	0.774099	0.162257	0.219506
38	2019	1	Hebei	1	0	0	0	1	1.06879	2.95271	4.73021	0.481348	0.437193	1.0171	0.744804	0.234422	15.7941	0.4735	0.211026	0.13769	0.0254	0.908269	0.169232	0.201178
38	2020	1	Hebei	1	0	0	0	1	1.16612	3.11275	4.71687	0.480584	0.433289	1.26171	0.857137	0.236706	15.8296	0.47	0.219873	0.140382	0.2025	0.901589	0.179214	0.21602
39	2013	0	Hebei	1	0	0	0	1	0.5774	2.02	4.59182	0.38152	0.396079	0.816219	0.415392	0.16026	13.5004	0.94	0.10406	0.098409	0.0619	1.03816	0.582933	0.329027
39	2014	0	Hebei	1	0	0	0	1	0.64513	2.2124	4.58906	0.377869	0.409828	0.880802	0.428557	0.164597	13.6732	1	0.113499	0.103738	0.0559	1.08458	0.561842	0.26749
39	2015	0	Hebei	1	0	0	0	1	0.72468	2.42729	4.58074	0.384399	0.415611	0.984796	0.48404	0.195598	13.8057	1.01	0.123311	0.106506	0.0559	1.0812	0.520267	0.232536
39	2016	0	Hebei	1	0	0	0	1	0.79597	2.63114	4.57235	0.444798	0.381022	0.950426	0.502363	0.180292	13.8853	0.96	0.135732	0.123262	0.1199	0.856617	0.391594	0.205923
39	2017	1	Hebei	1	0	0	0	1	0.87327	2.86217	4.56388	0.423072	0.429872	1.09608	0.625706	0.214539	14.022	0.96	0.141565	0.128552	0.1688	1.01607	0.347593	0.196039
39	2018	1	Hebei	1	0	0	0	1	0.97469	3.07743	4.5582	0.400911	0.446783	1.22177	0.697805	0.247163	14.1462	0.9768	0.147984	0.132327	0.2408	1.11442	0.379898	0.187169
39	2019	1	Hebei	1	0	0	0	1	1.05696	3.25894	4.55535	0.311238	0.516113	1.51457	0.906952	0.26241	14.2591	0.9816	0.155698	0.136507	0.1256	1.65826	0.554715	0.202605
39	2020	1	Hebei	1	0	0	0	1	1.15207	3.41486	4.54674	0.312874	0.50549	1.64424	1.00196	0.314944	14.3617	0.99	0.162201	0.138874	0.1399	1.61563	0.580542	0.171293
40	2013	0	Hebei	1	0	0	0	1	0.5089	1.26	4.49651	0.53535	0.233287	0.989781	0.562652	0.183551	13.1268	0.5	0.147633	0.055941	0.1401	0.435765	0.432173	0.265113
40	2014	0	Hebei	1	0	0	0	1	0.57099	1.4061	4.46574	0.402203	0.335624	1.3814	0.880176	0.255743	13.2035	0.52	0.137305	0.060709	0.1351	0.834465	0.651843	0.231884
40	2015	0	Hebei	1	0	0	0	1	0.63178	1.5597	4.46574	0.374959	0.35796	1.56613	1.00732	0.235664	13.2025	0.55	0.135429	0.068298	0.2288	0.954666	0.712292	0.242715
40	2016	0	Hebei	1	0	0	0	1	0.69888	1.72848	4.47723	0.367983	0.371392	1.55814	0.959455	0.262311	13.1808	0.45	0.143237	0.075163	0.1729	1.00927	0.708252	0.20935
40	2017	0	Hebei	1	0	0	0	1	0.77436	1.90278	4.4327	0.359983	0.363563	1.46667	0.97958	0.248796	13.2342	0.5	0.15389	0.079029	0.2288	1.00994	0.767967	0.21297
40	2018	1	Hebei	1	0	0	0	1	0.85064	2.07362	4.46261	0.333896	0.379436	1.55337	0.98772	0.281891	13.2288	0.5856	0.157449	0.093726	0.154	1.13639	0.858557	0.197105
40	2019	1	Hebei	1	0	0	0	1	0.93405	2.26284	4.45947	0.189682	0.500438	1.77458	1.02095	0.29335	13.2293	0.592	0.177146	0.103567	0.0958	2.6383	1.63368	0.210252
40	2020	1	Hebei	1	0	0	0	1	1.01228	2.47327	4.46323	0.186679	0.503992	1.89813	1.15782	0.339315	13.2293	0.6	0.187426	0.096597	0.1039	2.69978	1.65702	0.187741
41	2013	0	Hebei	1	0	0	0	1	0.4916	1.34	4.09104	0.532493	0.293156	1.03144	0.543537	0.214446	13.5227	0.56	0.056261	0.036092	0.1767	0.550534	0.327425	0.183155
41	2014	0	Hebei	1	0	0	0	1	0.54858	1.47493	4.09104	0.501431	0.335202	1.08226	0.615021	0.197781	13.6425	0.56	0.059563	0.037297	0.2298	0.668491	0.325801	0.230187
41	2015	0	Hebei	1	0	0	0	1	0.61131	1.63769	4.09104	0.493399	0.358112	1.21706	0.715897	0.295212	13.6584	0.58	0.061505	0.036264	0.236	0.725806	0.300952	0.175146
41	2016	0	Hebei	1	0	0	0	1	0.67862	1.80531	4.08329	0.518446	0.342385	1.11733	0.712248	0.220523	13.6804	0.57	0.061137	0.046059	0.1246	0.660405	0.268435	0.221805
41	2017	0	Hebei	1	0	0	0	1	0.7519	1.98824	4.07408	0.491958	0.388569	1.14736	0.765793	0.225691	13.7024	0.58	0.061049	0.059264	0.1307	0.789842	0.242851	0.230107
41	2018	0	Hebei	1	0	0	0	1	0.83113	2.16301	4.07269	0.459271	0.417135	1.25983	0.829521	0.27194	13.7218	0.5926	0.060697	0.054189	0.135	0.908254	0.26911	0.205251
41	2019	1	Hebei	1	0	0	0	1	0.90534	2.36462	4.06805	0.320738	0.521759	1.59253	1.04716	0.28732	13.7388	0.5965	0.060474	0.053166	0.052	1.62674	0.491062	0.22506
41	2020	1	Hebei	1	0	0	0	1	0.9795	2.59574	4.06666	0.338277	0.507368	1.67038	1.09518	0.312292	13.7538	0.61	0.062198	0.061164	0.0606	1.49986	0.456297	0.202791
42	2013	0	Hebei	1	0	0	0	1	0.4715	1.55	4.3673	0.388039	0.26896	1.22401	0.469539	0.20233	13.2164	0.81	0.056382	0.082784	0.2084	0.693127	0.883934	0.211121
42	2014	0	Hebei	1	0	0	0	1	0.53363	1.67159	4.4012	0.36788	0.312137	1.39156	0.555	0.260605	13.3117	0.81	0.060053	0.097464	0.2273	0.848474	0.869801	0.18401
42	2015	0	Hebei	1	0	0	0	1	0.59785	1.8424	4.3673	0.316377	0.323386	1.4567	0.593104	0.265585	13.3376	0.81	0.065209	0.091909	0.2295	1.02215	1.13863	0.14748
42	2016	0	Hebei	1	0	0	0	1	0.66547	2.01656	4.37725	0.306503	0.328365	1.41374	0.652222	0.278481	13.3662	0.51	0.068564	0.109708	0.1367	1.07133	1.19128	0.137287
42	2017	0	Hebei	1	0	0	0	1	0.74063	2.20719	4.3485	0.290361	0.345425	1.38703	0.69282	0.24104	13.3864	0.52	0.072582	0.120428	0.163	1.18964	1.25435	0.165704
42	2018	1	Hebei	1	0	0	0	1	0.81726	2.39467	4.37074	0.279416	0.370849	1.41175	0.769974	0.267603	13.4	0.51	0.076949	0.126362	0.1661	1.32723	1.25167	0.157115
42	2019	1	Hebei	1	0	0	0	1	0.90308	2.60376	4.36384	0.175706	0.470437	1.42569	0.711823	0.263924	13.4091	0.53	0.08215	0.128648	0.0538	2.67741	2.01391	0.15939
42	2020	1	Hebei	1	0	0	0	1	0.96536	2.83617	4.36764	0.164222	0.467595	1.53218	0.83478	0.275872	13.4153	0.52	0.085418	0.133337	0.0452	2.84733	2.24198	0.157632
43	2013	0	Hebei	1	0	0	0	1	0.4876	1.64	4.53515	0.560917	0.224998	1.40681	0.534348	0.200081	13.6456	0.73	0.110867	0.052681	0.4943	0.401125	0.381671	0.173533
43	2014	0	Hebei	1	0	0	0	1	0.55133	1.75025	4.53515	0.525467	0.264403	1.54513	0.675492	0.284579	13.7844	0.74	0.116729	0.055134	0.6222	0.503178	0.39989	0.147707
43	2015	0	Hebei	1	0	0	0	1	0.6155	1.92039	4.53515	0.449886	0.31251	1.70168	0.80496	0.27386	13.8885	0.75	0.119904	0.05971	1.2833	0.694643	0.528142	0.183265
43	2016	0	Hebei	1	0	0	0	1	0.68506	2.09339	4.53806	0.511382	0.280027	1.53142	0.754702	0.207158	13.9498	0.55	0.121608	0.097045	0.2145	0.547589	0.407898	0.232213
43	2017	0	Hebei	1	0	0	0	1	0.76251	2.28507	4.5366	0.432055	0.356766	1.64497	0.832873	0.235637	14.1542	0.62	0.126315	0.102666	0.2183	0.825741	0.488778	0.219503
43	2018	1	Hebei	1	0	0	0	1	0.84065	2.47472	4.56671	0.438048	0.336094	1.80432	0.933384	0.29665	14.3585	0.66	0.133676	0.104255	0.2692	0.767255	0.5156	0.1949
43	2019	1	Hebei	1	0	0	0	1	0.91572	2.6909	4.56671	0.282366	0.481644	2.11303	1.04577	0.319636	14.5628	0.67	0.134237	0.097724	0.2069	1.70575	0.835762	0.200239
43	2020	1	Hebei	1	0	0	0	1	0.96695	2.93602	4.51453	0.262695	0.490828	2.05675	1.19959	0.336933	14.7672	0.68	0.137811	0.097386	0.2387	1.86843	0.938255	0.202907
44	2013	0	Shanxi	0	1	0	0	1	0.4602	1.5754	3.31254	0.483336	0.41049	1.42997	0.548642	0.669379	12.6145	0.11	0.041055	0.02113	0.1125	0.849283	0.219669	0.527458
44	2014	0	Shanxi	0	1	0	0	1	0.49971	1.60229	3.29253	0.372607	0.507516	1.58585	0.778024	0.807971	12.3217	0.11	0.038724	0.02356	0.1125	1.36207	0.321724	0.29642
44	2015	0	Shanxi	0	1	0	0	1	0.54101	1.71157	3.28238	0.218685	0.658581	1.67307	0.92905	0.544965	11.5982	0.11	0.036432	0.023453	0.1125	3.01154	0.561235	0.373634
44	2016	0	Shanxi	0	1	0	0	1	0.58343	1.8086	3.26176	0.382211	0.510622	1.30003	0.700918	0.613355	11.6812	0.06	0.034936	0.025507	0.1125	1.33597	0.280385	0.235433
44	2017	0	Shanxi	0	1	0	0	1	0.64084	1.89611	3.25129	0.408961	0.496212	1.59411	0.557486	0.709814	11.6774	0.03	0.032081	0.026862	0.1096	1.21335	0.231871	0.206421
44	2018	0	Shanxi	0	1	0	0	1	0.70858	1.99505	3.24071	0.408368	0.484678	1.60245	1.31678	0.828265	11.6762	0.0265	0.031867	0.030062	0.1096	1.18687	0.261907	0.204084
44	2019	1	Shanxi	0	1	0	0	1	0.77949	2.0977	3.2192	0.403611	0.509968	1.56495	1.43784	0.682806	11.6758	0.0275	0.029832	0.030409	0.1071	1.26351	0.214119	0.249905
44	2020	1	Shanxi	0	1	0	0	1	0.84038	2.13824	3.20827	0.487174	0.432627	1.36831	1.35059	0.679666	11.6757	0.03	0.029659	0.030657	0.1071	0.888033	0.164622	0.216647
45	2013	0	Shanxi	0	1	0	0	1	0.6364	1.4883	3.94444	0.2204	0.470494	1.36956	0.633195	0.508863	13.4044	0.21	0.048035	0.033876	0.0249	2.13473	1.40248	0.139428
45	2014	0	Shanxi	0	1	0	0	1	0.69628	1.54998	3.89037	0.224435	0.470202	1.34087	0.646321	0.415233	12.2959	0.22	0.044755	0.034473	0.0319	2.09505	1.36058	0.219224
45	2015	0	Shanxi	0	1	0	0	1	0.75018	1.66798	3.89037	0.214528	0.499638	1.4382	0.728763	0.546683	12.1474	0.23	0.042748	0.03617	0.0442	2.32901	1.33238	0.122238
45	2016	0	Shanxi	0	1	0	0	1	0.79193	1.76412	3.95595	0.219568	0.497816	1.61133	0.780027	0.583553	12.2546	0.13	0.041221	0.038144	0.0442	2.26725	1.28715	0.103122
45	2017	0	Shanxi	0	1	0	0	1	0.84514	1.85824	3.96114	0.259996	0.483628	1.5725	0.714607	0.5337	12.2567	0.136	0.030937	0.034998	0.0503	1.86013	0.986076	0.113709
45	2018	0	Shanxi	0	1	0	0	1	0.9108	1.95333	3.96424	0.29523	0.476908	1.55148	0.9148	0.527351	12.257	0.137	0.0361	0.035667	0.0529	1.61538	0.77181	0.12736
45	2019	1	Shanxi	0	1	0	0	1	0.97718	2.05187	3.96218	0.480299	0.454575	0.484925	0.288633	0.126121	12.257	0.14	0.032336	0.033228	0.0618	0.94644	0.135595	0.157257
45	2020	1	Shanxi	0	1	0	0	1	1.04557	2.09441	3.96114	0.495764	0.442777	0.535129	0.30828	0.153141	12.257	0.134	0.022582	0.060372	0.0653	0.893122	0.123969	0.131033
46	2013	0	Shanxi	0	1	0	0	1	0.5186	1.576	4.3673	0.187247	0.416939	1.68684	1.14516	0.594366	11.9972	0.25	0.064525	0.081674	0.05	2.22668	2.11386	0.120661
46	2014	0	Shanxi	0	1	0	0	1	0.5652	1.66227	4.3673	0.1762	0.434319	1.82168	0.919567	0.465847	12.0215	0.27	0.059083	0.09043	0.05	2.46493	2.21045	0.11284
46	2015	0	Shanxi	0	1	0	0	1	0.61187	1.7712	4.3673	0.17146	0.483102	2.01775	0.818344	0.584239	11.8948	0.28	0.054913	0.089902	0.07	2.81758	2.01469	0.069745
46	2016	0	Shanxi	0	1	0	0	1	0.65083	1.87146	4.3322	0.185954	0.468526	2.07438	0.776646	0.600128	12.0155	0.21	0.052875	0.092418	0.07	2.51958	1.85809	0.059713
46	2017	0	Shanxi	0	1	0	0	1	0.69459	1.97866	4.33648	0.187231	0.477826	2.10343	0.834903	0.706155	11.9947	0.21	0.053498	0.096996	0.071	2.55206	1.78893	0.052405
46	2018	0	Shanxi	0	1	0	0	1	0.74993	2.08375	4.28579	0.224863	0.465152	2.04385	0.876168	0.632626	11.9931	0.2103	0.049569	0.095526	0.071	2.0686	1.37855	0.056266
46	2019	1	Shanxi	0	1	0	0	1	0.80529	2.18278	4.28728	0.220147	0.513276	1.70572	0.734945	0.414202	11.993	0.236	0.049912	0.108484	0.0956	2.33151	1.2109	0.069935
46	2020	1	Shanxi	0	1	0	0	1	0.86332	2.22875	4.28429	0.238718	0.489039	1.79827	0.662891	0.440361	11.993	0.24	0.049181	0.110176	0.0996	2.04861	1.14044	0.062176
47	2013	0	Shanxi	0	1	0	0	1	0.4735	1.6341	4.01062	0.284664	0.415724	2.03565	0.92766	0.719825	11.3691	0.18	0.07293	0.038636	0.0189	1.4604	1.05251	0.051829
47	2014	0	Shanxi	0	1	0	0	1	0.51476	1.71301	3.98062	0.285576	0.419941	2.07154	0.955215	0.581962	11.4609	0.19	0.063866	0.042308	0.0189	1.47051	1.03119	0.086186
47	2015	0	Shanxi	0	1	0	0	1	0.55567	1.82369	3.94969	0.26778	0.450083	2.32703	0.932034	0.786031	11.0944	0.19	0.060986	0.043213	0.0691	1.68079	1.05362	0.053025
47	2016	0	Shanxi	0	1	0	0	1	0.58604	1.89999	3.91777	0.281742	0.429295	2.31191	0.953779	0.735814	11.0333	0.12	0.060986	0.045501	0.0701	1.52372	1.02563	0.047784
47	2017	0	Shanxi	0	1	0	0	1	0.65212	1.99568	3.8848	0.300103	0.431461	2.33761	0.95124	0.768261	10.9655	0.11	0.055921	0.045022	0.068	1.43771	0.894479	0.053328
47	2018	0	Shanxi	0	1	0	0	1	0.72268	2.10367	3.84491	0.305922	0.431291	2.37348	0.940647	0.925138	11.0332	0.1268	0.05237	0.047218	0.07	1.40981	0.859	0.056267
47	2019	0	Shanxi	0	1	0	0	1	0.80062	2.21187	3.81541	0.246531	0.549647	1.99476	0.975011	0.760004	10.9656	0.1406	0.05316	0.048123	0.07	2.22953	0.826762	0.087563
47	2020	1	Shanxi	0	1	0	0	1	0.83667	2.24902	3.83908	0.236505	0.543833	2.07596	0.914739	0.726447	11.0331	0.144	0.051648	0.070751	0.0898	2.29945	0.928779	0.065637
48	2013	0	Shanxi	0	1	0	0	1	0.4982	1.6311	3.83908	0.33008	0.406297	1.74794	0.834766	0.646317	11.9773	0.14	0.068064	0.045572	0.0172	1.2309	0.798665	0.069811
48	2014	0	Shanxi	0	1	0	0	1	0.54603	1.71065	3.82731	0.317515	0.418289	1.76639	0.834347	0.553253	11.6701	0.15	0.063863	0.045908	0.018	1.31738	0.832071	0.089754
48	2015	0	Shanxi	0	1	0	0	1	0.59017	1.81762	3.8094	0.26753	0.480782	1.91014	0.827336	0.76954	11.5337	0.16	0.061307	0.047206	0.018	1.79712	0.940786	0.0566
48	2016	0	Shanxi	0	1	0	0	1	0.61892	1.90086	3.79728	0.267558	0.489991	1.82181	0.846698	0.786084	11.5571	0.1	0.061095	0.048465	0.018	1.83134	0.906162	0.049246
48	2017	0	Shanxi	0	1	0	0	1	0.6856	1.99846	3.77882	0.302758	0.468963	1.98583	0.855498	0.772122	11.5824	0.07	0.054289	0.050686	0.0392	1.54897	0.754	0.064264
48	2018	0	Shanxi	0	1	0	0	1	0.75839	2.10264	3.76632	0.311826	0.472422	1.82624	0.786744	0.751391	11.5733	0.0855	0.056447	0.050778	0.0469	1.51502	0.691902	0.071764
48	2019	0	Shanxi	0	1	0	0	1	0.84023	2.20052	3.75366	0.307886	0.501446	1.37287	0.766548	0.624766	11.5766	0.092	0.056114	0.056148	0.0469	1.62868	0.619281	0.098535
48	2020	1	Shanxi	0	1	0	0	1	0.88617	2.23548	3.73437	0.304442	0.504536	1.75609	0.679473	0.685047	11.5754	0.0943	0.051038	0.057163	0.0469	1.65725	0.627452	0.092134
49	2013	0	Shanxi	0	1	0	0	1	0.5195	1.9844	4.10906	0.503115	0.394192	1.77496	0.578813	0.372419	12.6112	0.22	0.07815	0.064191	0.1075	0.783504	0.204115	0.192543
49	2014	0	Shanxi	0	1	0	0	1	0.57071	2.06946	4.10459	0.474065	0.418623	1.81939	0.599515	0.40738	12.2647	0.23	0.093977	0.06447	0.1075	0.88305	0.226366	0.144824
49	2015	0	Shanxi	0	1	0	0	1	0.61099	2.21954	4.09558	0.332576	0.539442	2.30335	0.687928	0.640598	10.9937	0.23	0.091133	0.065296	0.1075	1.62201	0.384819	0.060921
49	2016	0	Shanxi	0	1	0	0	1	0.64803	2.32995	4.09104	0.322467	0.553578	2.37489	0.674593	0.671984	11.2346	0.23	0.090328	0.058828	0.1075	1.71669	0.384395	0.111488
49	2017	0	Shanxi	0	1	0	0	1	0.69545	2.44494	4.08191	0.349254	0.535241	2.31774	0.69675	0.610438	11.0935	0.25	0.090084	0.047333	0.1075	1.53253	0.330719	0.064124
49	2018	0	Shanxi	0	1	0	0	1	0.7488	2.56288	4.07269	0.370623	0.52244	2.30452	0.673579	0.573166	10.9768	0.0572	0.090919	0.071707	0.1153	1.40963	0.288533	0.066061
49	2019	1	Shanxi	0	1	0	0	1	0.80556	2.67969	4.06805	0.302347	0.602069	2.00222	0.813373	0.460548	10.8804	0.0711	0.089477	0.061912	0.255	1.99132	0.316141	0.080792
49	2020	1	Shanxi	0	1	0	0	1	0.84393	2.72899	4.054	0.30084	0.597528	2.11073	0.931728	0.477337	10.8007	0.064	0.088842	0.101499	0.2563	1.9862	0.337827	0.077901
50	2013	0	Shanxi	0	1	0	0	1	0.5143	1.6617	4.54096	0.379875	0.362231	1.32311	0.727806	0.444003	12.7032	0.18	0.085136	0.086519	0.056	0.953552	0.678892	0.217282
50	2014	0	Shanxi	0	1	0	0	1	0.56619	1.74772	4.55535	0.318723	0.398117	1.45386	0.726602	0.418522	12.2861	0.19	0.082021	0.090921	0.056	1.2491	0.888417	0.178158
50	2015	0	Shanxi	0	1	0	0	1	0.60649	1.87823	4.55535	0.278573	0.440243	1.77873	0.804254	0.75192	11.9984	0.2	0.072944	0.09836	0.056	1.58035	1.00937	0.105059
50	2016	0	Shanxi	0	1	0	0	1	0.64145	1.98093	4.56643	0.273639	0.444731	2.04024	0.790149	0.636268	12.1464	0.2	0.063211	0.099658	0.056	1.62525	1.0292	0.098367
50	2017	0	Shanxi	0	1	0	0	1	0.70425	2.08655	4.57094	0.295446	0.441603	2.14182	0.720656	0.653519	12.1323	0.09	0.062427	0.096891	0.056	1.4947	0.890015	0.101942
50	2018	0	Shanxi	0	1	0	0	1	0.75622	2.18514	4.57431	0.252093	0.472261	2.30132	0.828169	0.674386	12.1197	0.0918	0.061172	0.100389	0.058	1.87336	1.09343	0.089383
50	2019	0	Shanxi	0	1	0	0	1	0.83712	2.28047	4.57627	0.157963	0.607194	2.12769	0.88544	0.408162	12.1086	0.0959	0.074794	0.102728	0.058	3.8439	1.48669	0.144853
50	2020	1	Shanxi	0	1	0	0	1	0.87412	2.31163	4.57543	0.163667	0.630304	2.39795	1.08594	0.415506	12.0988	0.1	0.076835	0.116352	0.058	3.85113	1.25883	0.081656
51	2013	0	Shanxi	0	1	0	0	1	0.4155	1.6954	3.6174	0.497254	0.390133	0.968027	0.8902	0.457714	12.4066	0.12	0.037107	0.037019	0.063	0.784575	0.226468	0.074883
51	2014	0	Shanxi	0	1	0	0	1	0.45999	1.77221	3.59525	0.460735	0.443284	1.08067	0.835682	0.515161	12.4972	0.12	0.035051	0.043856	0.063	0.962125	0.208321	0.066268
51	2015	0	Shanxi	0	1	0	0	1	0.49399	1.90647	3.56495	0.390924	0.502633	1.29103	1.15935	0.585678	12.2676	0.12	0.033427	0.04446	0.067	1.28576	0.272285	0.07095
51	2016	0	Shanxi	0	1	0	0	1	0.5313	1.9994	3.5416	0.368286	0.519635	1.40098	0.941934	0.584604	12.1758	0.05	0.032478	0.043265	0.063	1.41095	0.304324	0.068397
51	2017	0	Shanxi	0	1	0	0	1	0.58163	2.10606	3.5177	0.355682	0.530558	1.43984	1.01703	0.693001	12.1812	0.04	0.031065	0.043414	0.0423	1.49166	0.319837	0.063023
51	2018	0	Shanxi	0	1	0	0	1	0.64347	2.18899	3.48491	0.273318	0.60059	1.66916	1.20324	0.77983	12.1863	0.0475	0.029928	0.045025	0.028	2.1974	0.461339	0.062782
51	2019	0	Shanxi	0	1	0	0	1	0.71847	2.30161	3.45959	0.253751	0.62977	1.73207	1.24007	1.00366	12.1909	0.0508	0.028768	0.051025	0.028	2.48185	0.459031	0.049134
51	2020	1	Shanxi	0	1	0	0	1	0.76786	2.33058	3.451	0.225575	0.638606	1.879	1.40004	0.944384	12.1953	0.06	0.028157	0.051576	0.0165	2.83101	0.602099	0.053441
52	2013	0	Shanxi	0	1	0	0	1	0.4005	1.672	4.32504	0.587417	0.304141	1.11532	0.73573	0.328891	13.7625	0.14	0.092462	0.043034	0.1174	0.51776	0.184607	0.160317
52	2014	0	Shanxi	0	1	0	0	1	0.43875	1.76051	4.2884	0.525557	0.376447	1.0157	0.548911	0.289549	13.8802	0.15	0.085632	0.045976	0.1174	0.716282	0.18646	0.160079
52	2015	0	Shanxi	0	1	0	0	1	0.47229	1.88888	4.26576	0.498812	0.399924	1.14025	0.60859	0.296502	13.7159	0.15	0.080486	0.04961	0.1074	0.801753	0.203012	0.160728
52	2016	0	Shanxi	0	1	0	0	1	0.50703	1.99409	4.24649	0.431683	0.45828	1.3155	0.709767	0.35782	13.5511	0.06	0.079315	0.06305	0.1024	1.06161	0.254901	0.122995
52	2017	0	Shanxi	0	1	0	0	1	0.55514	2.10635	4.22684	0.443665	0.456474	1.29069	0.751272	0.350645	13.4626	0.04	0.078695	0.098904	0.0781	1.02887	0.225082	0.093281
52	2018	0	Shanxi	0	1	0	0	1	0.61406	2.20374	4.2068	0.354496	0.537205	1.46356	0.932252	0.398259	13.3819	0.0475	0.078871	0.108745	0.0807	1.51541	0.305502	0.093655
52	2019	0	Shanxi	0	1	0	0	1	0.68746	2.30636	4.18635	0.349381	0.545613	1.55465	0.85171	0.442427	13.3083	0.0503	0.078143	0.113743	0.0737	1.56165	0.300548	0.093726
52	2020	1	Shanxi	0	1	0	0	1	0.73678	2.34652	4.17805	0.368043	0.527094	1.64655	0.904934	0.457543	13.2413	0.054	0.078005	0.122708	0.0699	1.43215	0.28492	0.103471
53	2013	0	Shanxi	0	1	0	0	1	0.4476	1.7299	3.83908	0.682497	0.273756	0.591181	0.577987	0.192662	13.491	0.18	0.064242	0.025678	0.0795	0.401109	0.064099	0.42194
53	2014	0	Shanxi	0	1	0	0	1	0.49676	1.81646	3.82731	0.614038	0.334914	0.68957	1.03152	0.258744	13.3588	0.19	0.059887	0.02457	0.0795	0.545429	0.083135	0.545078
53	2015	0	Shanxi	0	1	0	0	1	0.53358	1.94362	3.8094	0.494774	0.443283	0.925349	0.693937	0.285356	13.1228	0.19	0.057438	0.034293	0.0807	0.895929	0.125194	0.204332
53	2016	0	Shanxi	0	1	0	0	1	0.5754	2.03644	3.79728	0.461149	0.475952	1.00793	0.607085	0.274795	13.211	0.11	0.055991	0.038627	0.075	1.0321	0.136396	0.206906
53	2017	0	Shanxi	0	1	0	0	1	0.6306	2.15914	3.77882	0.491295	0.451178	0.983937	0.579921	0.295716	13.4255	0.1	0.054208	0.028657	0.0781	0.918344	0.117092	0.179479
53	2018	0	Shanxi	0	1	0	0	1	0.69815	2.25693	3.76001	0.445337	0.491563	1.12476	0.711949	0.347624	13.4971	0.1121	0.053103	0.040317	0.0638	1.1038	0.14169	0.221882
53	2019	1	Shanxi	0	1	0	0	1	0.74967	2.37744	3.74727	0.422405	0.509847	1.16447	0.710393	0.325458	13.521	0.1193	0.051316	0.036013	0.0638	1.20701	0.160385	0.252816
53	2020	1	Shanxi	0	1	0	0	1	0.80266	2.40267	3.74084	0.424959	0.507589	1.19426	0.730087	0.35989	13.529	0.123	0.051636	0.034292	0.0638	1.19444	0.158726	0.232301
54	2013	0	Shanxi	0	1	0	0	1	0.5212	1.7252	3.35138	0.499341	0.408048	0.603138	0.288969	0.208919	13.2258	0.22	0.028223	0.052579	0.0812	0.817174	0.185466	0.384566
54	2014	0	Shanxi	0	1	0	0	1	0.5712	1.82973	3.33214	0.498155	0.400628	0.651564	0.391571	0.260893	13.0918	0.23	0.026294	0.053786	0.0725	0.804224	0.203183	0.3126
54	2015	0	Shanxi	0	1	0	0	1	0.60405	1.95231	3.30259	0.487222	0.413391	0.709927	0.396878	0.240503	12.766	0.23	0.026392	0.055079	0.0725	0.848464	0.203987	0.219135
54	2016	0	Shanxi	0	1	0	0	1	0.6371	2.0436	3.28238	0.462967	0.435991	0.803679	0.458217	0.1882	12.876	0.13	0.02533	0.05618	0.068	0.941732	0.218251	0.271524
54	2017	0	Shanxi	0	1	0	0	1	0.68493	2.17282	3.26176	0.498221	0.42127	0.748358	0.476229	0.190172	12.8688	0.12	0.023918	0.059212	0.068	0.845549	0.161593	0.289816
54	2018	1	Shanxi	0	1	0	0	1	0.7395	2.28192	3.23001	0.465442	0.450427	0.752134	0.492286	0.214258	12.8623	0.1273	0.022218	0.0699	0.034	0.96774	0.180757	0.273785
54	2019	1	Shanxi	0	1	0	0	1	0.83301	2.43041	3.20827	0.446779	0.477919	0.659944	0.510692	0.205154	12.8566	0.1325	0.024705	0.066046	0.05	1.0697	0.168545	0.235006
54	2020	1	Shanxi	0	1	0	0	1	0.88776	2.44686	3.17475	0.395762	0.530729	0.864574	0.608842	0.213789	12.8515	0.134	0.024799	0.065144	0.05	1.34103	0.185742	0.231622
55	2013	0	Shanxi	0	1	0	0	1	0.3699	1.9561	3.77259	0.506627	0.410576	1.49434	0.974986	0.340581	12.8558	0.17	0.049491	0.045232	0.0841	0.81041	0.163428	0.369491
55	2014	0	Shanxi	0	1	0	0	1	0.40728	2.06041	3.77259	0.488651	0.417629	1.46203	1.06897	0.327246	12.8736	0.18	0.050419	0.047002	0.0841	0.854658	0.191792	0.407413
55	2015	0	Shanxi	0	1	0	0	1	0.433	2.18211	3.77259	0.477073	0.441936	1.51844	1.21731	0.303916	12.6971	0.18	0.051176	0.049095	0.0841	0.926349	0.169766	0.344273
55	2016	0	Shanxi	0	1	0	0	1	0.45887	2.29068	3.8082	0.471206	0.449232	1.48193	1.37462	0.306579	12.7169	0.11	0.051634	0.036311	0.097	0.953368	0.168847	0.330372
55	2017	0	Shanxi	0	1	0	0	1	0.50282	2.42648	3.81301	0.495486	0.434795	1.37322	1.30483	0.333738	12.7303	0.08	0.05276	0.039234	0.077	0.877512	0.140707	0.410559
55	2018	0	Shanxi	0	1	0	0	1	0.56905	2.55066	3.8178	0.491437	0.438571	1.3468	1.2656	0.328913	12.743	0.0806	0.054537	0.042204	0.077	0.892425	0.142424	0.243438
55	2019	1	Shanxi	0	1	0	0	1	0.657	2.64456	3.82138	0.47466	0.451028	1.55328	1.33037	0.331791	12.7551	0.0901	0.05593	0.045081	0.0786	0.950212	0.156558	0.263369
55	2020	1	Shanxi	0	1	0	0	1	0.68816	2.65983	3.82019	0.470382	0.444598	1.697	1.20994	0.399223	12.7667	0.1	0.055714	0.045315	0.0942	0.945184	0.180746	0.220317
56	2013	0	Shanxi	0	1	0	0	1	0.4347	1.7787	3.6174	0.613762	0.316877	1.10004	0.483715	0.314668	12.968	0.17	0.038338	0.049465	0.0305	0.516286	0.113011	0.465631
56	2014	0	Shanxi	0	1	0	0	1	0.47936	1.88391	3.60269	0.548758	0.387808	1.17928	0.498007	0.247888	12.8594	0.17	0.038171	0.049964	0.0305	0.706702	0.115595	0.589747
56	2015	0	Shanxi	0	1	0	0	1	0.51647	2.02347	3.58022	0.509074	0.424745	1.2768	0.495832	0.264477	12.7754	0.18	0.03805	0.050463	0.0307	0.834347	0.130002	0.294871
56	2016	0	Shanxi	0	1	0	0	1	0.54523	2.13421	3.57261	0.5161	0.42236	1.28715	0.45647	0.325365	12.8811	0.11	0.038419	0.050962	0.022	0.818369	0.119241	0.286812
56	2017	0	Shanxi	0	1	0	0	1	0.59856	2.26282	3.55723	0.516015	0.424717	1.15952	0.629061	0.34065	12.9865	0.08	0.0387	0.051448	0.022	0.823072	0.114856	0.610709
56	2018	0	Shanxi	0	1	0	0	1	0.67626	2.37419	3.5416	0.527945	0.408631	1.11279	0.473729	0.259148	13.089	0.089	0.038978	0.052685	0.022	0.774002	0.120134	0.370816
56	2019	1	Shanxi	0	1	0	0	1	0.76568	2.4616	3.52573	0.499021	0.4378	1.22825	0.555788	0.319913	13.1888	0.0921	0.038821	0.0506	0.022	0.877318	0.126607	0.32315
56	2020	1	Shanxi	0	1	0	0	1	0.79974	2.48538	3.49321	0.560792	0.385858	1.23672	0.592386	0.286686	13.2859	0.094	0.03857	0.055124	0.022	0.688059	0.095132	0.479057
57	2013	0	Shanxi	0	1	0	0	1	0.4745	1.678	4.18221	0.349985	0.369837	1.38789	0.529268	0.384591	12.6575	0.53	0.074744	0.095005	0.0264	1.05672	0.800542	0.092013
57	2014	0	Shanxi	0	1	0	0	1	0.52754	1.80456	4.16547	0.340006	0.393744	1.42695	0.438057	0.402369	12.8228	0.54	0.066671	0.095477	0.0264	1.15805	0.783076	0.131367
57	2015	0	Shanxi	0	1	0	0	1	0.56515	1.95104	4.16547	0.334521	0.400363	1.55552	0.291288	0.467156	12.8537	0.55	0.063751	0.097886	0.0268	1.19682	0.792523	0.206878
57	2016	0	Shanxi	0	1	0	0	1	0.60171	2.05782	4.11795	0.324379	0.420758	1.70414	0.39178	0.4005	12.7332	0.34	0.063618	0.098681	0.0268	1.29712	0.785698	0.233497
57	2017	0	Shanxi	0	1	0	0	1	0.65939	2.18382	4.09558	0.347835	0.413873	0.169515	0.551642	0.366598	12.6799	0.17	0.058697	0.098738	0.027	1.18985	0.685071	0.377254
57	2018	0	Shanxi	0	1	0	0	1	0.73067	2.29987	4.07269	0.370556	0.409288	1.62272	0.442917	0.391336	12.6409	0.172	0.057071	0.099671	0.027	1.10452	0.594123	0.16183
57	2019	1	Shanxi	0	1	0	0	1	0.79742	2.39802	4.04452	0.299584	0.481614	1.67812	0.55969	0.391258	12.6124	0.1772	0.05524	0.10494	0.027	1.60761	0.730352	0.138791
57	2020	1	Shanxi	0	1	0	0	1	0.85455	2.43508	4.02042	0.30211	0.500569	1.88108	0.742023	0.40943	12.5915	0.164	0.053893	0.106374	0.06	1.65691	0.653145	0.155384
58	2013	0	Shanxi	0	1	0	0	1	0.4555	1.8886	4.46574	0.273213	0.589886	2.32817	1.63323	0.433286	12.5511	0.15	0.108176	0.067297	0.022	2.15907	0.501076	0.178533
58	2014	0	Shanxi	0	1	0	0	1	0.49499	2.02914	4.46574	0.278325	0.584459	2.41592	1.74829	0.471909	12.5415	0.15	0.103501	0.063472	0.022	2.09992	0.493005	0.201259
58	2015	0	Shanxi	0	1	0	0	1	0.52419	2.1824	4.43399	0.257422	0.62228	2.64985	1.69052	0.457658	12.458	0.16	0.090727	0.064298	0.022	2.41735	0.467317	0.191656
58	2016	0	Shanxi	0	1	0	0	1	0.55751	2.30181	4.42165	0.257511	0.627513	2.8534	1.52212	0.464992	12.3741	0.16	0.08748	0.065006	0.022	2.43684	0.446493	0.144041
58	2017	0	Shanxi	0	1	0	0	1	0.59665	2.40639	4.42361	0.304643	0.595539	2.73642	1.49484	0.415984	12.4602	0.09	0.082512	0.047509	0.022	1.95488	0.327657	0.116797
58	2018	0	Shanxi	0	1	0	0	1	0.63774	2.50349	4.42491	0.328372	0.571253	2.56101	1.62255	0.419125	12.5437	0.0935	0.084843	0.04448	0.022	1.73965	0.305672	0.1075
58	2019	0	Shanxi	0	1	0	0	1	0.70219	2.60541	4.42491	0.24037	0.654083	3.00404	1.8933	0.490826	12.6246	0.1008	0.082669	0.052387	0.065	2.72115	0.439103	0.093338
58	2020	1	Shanxi	0	1	0	0	1	0.73961	2.67099	4.43399	0.211154	0.69274	2.92729	1.76719	0.54344	12.7031	0.11	0.078165	0.058335	0.022	3.28073	0.455143	0.140247
59	2013	0	Shanxi	0	1	0	0	1	0.4098	1.925	4.04452	0.63122	0.313042	1.58713	0.609462	0.221871	13.4492	0.2	0.080124	0.05168	0.0222	0.495932	0.088301	0.430854
59	2014	0	Shanxi	0	1	0	0	1	0.44858	2.03799	4.04452	0.597138	0.346275	1.86237	0.80934	0.251736	13.4106	0.2	0.068017	0.052624	0.04	0.579891	0.094765	0.459168
59	2015	0	Shanxi	0	1	0	0	1	0.47757	2.17976	4.04452	0.573643	0.369749	1.94394	0.840296	0.263212	13.1921	0.21	0.059008	0.053877	0.04	0.644562	0.098682	0.466669
59	2016	0	Shanxi	0	1	0	0	1	0.49988	2.29252	4.09377	0.554373	0.392376	1.82775	0.930229	0.270915	13.2696	0.12	0.054892	0.054669	0.04	0.707784	0.096058	0.288105
59	2017	0	Shanxi	0	1	0	0	1	0.53151	2.4194	4.09558	0.611783	0.34517	1.48294	0.748505	0.225129	13.4266	0.08	0.042845	0.051119	0.041	0.564203	0.070363	0.203031
59	2018	0	Shanxi	0	1	0	0	1	0.56604	2.51467	4.09558	0.632094	0.327877	1.33954	0.657813	0.21128	13.5828	0.0915	0.049626	0.052036	0.013	0.518716	0.063328	0.196711
59	2019	0	Shanxi	0	1	0	0	1	0.62599	2.60971	4.09558	0.581536	0.365143	2.13651	0.8983	0.278408	13.7381	0.1004	0.046954	0.053177	0.1179	0.627894	0.09169	0.179977
59	2020	1	Shanxi	0	1	0	0	1	0.65389	2.63495	4.09513	0.587907	0.360621	2.30359	0.706615	0.290398	13.8926	0.1	0.043773	0.064188	0.0481	0.613398	0.08755	0.204684
60	2013	0	Shanxi	0	1	0	0	1	0.5381	2.0981	4.3322	0.686928	0.247056	1.12793	0.47464	0.250839	13.9447	0.21	0.08626	0.071619	0.0206	0.359654	0.096103	0.2398
60	2014	0	Shanxi	0	1	0	0	1	0.59116	2.25835	4.3322	0.615042	0.300476	1.37171	0.611419	0.296449	14.0156	0.22	0.084682	0.079172	0.0243	0.488546	0.137358	0.269323
60	2015	0	Shanxi	0	1	0	0	1	0.63279	2.43116	4.3322	0.586454	0.324556	1.51623	0.608087	0.302154	13.7776	0.22	0.084318	0.080076	0.0243	0.553421	0.151744	0.13
60	2016	0	Shanxi	0	1	0	0	1	0.67114	2.57858	4.31528	0.571473	0.336479	1.72139	0.754293	0.322859	13.74	0.17	0.083945	0.080981	0.0243	0.588792	0.161073	0.123635
60	2017	0	Shanxi	0	1	0	0	1	0.71955	2.69831	4.31963	0.571979	0.35	1.56158	0.787821	0.277408	13.9441	0.14	0.084504	0.083625	0.0436	0.611911	0.136406	0.12937
60	2018	0	Shanxi	0	1	0	0	1	0.78178	2.81254	4.32179	0.529036	0.390588	1.77369	0.713799	0.327498	14.148	0.1381	0.096364	0.08706	0.068	0.738302	0.15193	0.115877
60	2019	1	Shanxi	0	1	0	0	1	0.84636	2.96538	4.32215	0.479256	0.430322	1.88586	1.00881	0.327735	14.3519	0.1429	0.101096	0.090349	0.059	0.897896	0.188673	0.133065
60	2020	1	Shanxi	0	1	0	0	1	0.90282	3.04566	4.3236	0.455855	0.447306	2.06837	1.01129	0.344152	14.5556	0.15	0.101172	0.093217	0.0907	0.981247	0.212433	0.147242
61	2013	0	Shanxi	0	1	0	0	1	0.3777	1.7421	3.77259	0.646531	0.312911	1.46678	1.04343	0.326632	13.308	0.08	0.04171	0.062918	0.0071	0.483984	0.062731	0.421569
61	2014	0	Shanxi	0	1	0	0	1	0.41348	1.86326	3.77259	0.60284	0.348265	1.5989	1.055	0.259368	12.6534	0.08	0.031423	0.068666	0.0077	0.577707	0.081106	1.12786
61	2015	0	Shanxi	0	1	0	0	1	0.44414	1.99845	3.83321	0.585376	0.375209	1.68327	1.052	0.337837	12.5814	0.09	0.042615	0.06957	0.0077	0.64097	0.067333	0.890218
61	2016	0	Shanxi	0	1	0	0	1	0.46661	2.09979	3.80457	0.568022	0.386518	1.58895	1.17115	0.327677	12.6901	0.09	0.044286	0.070514	0.0077	0.680463	0.080033	0.766074
61	2017	0	Shanxi	0	1	0	0	1	0.51372	2.21385	3.8088	0.640252	0.323138	1.33917	0.531554	0.309557	12.6881	0.02	0.04518	0.071498	0.0077	0.504705	0.057182	0.934521
61	2018	0	Shanxi	0	1	0	0	1	0.55815	2.33154	3.81	0.618889	0.340414	1.35093	0.529939	0.314922	12.688	0.0235	0.042923	0.072521	0.0078	0.55004	0.065758	0.363759
61	2019	0	Shanxi	0	1	0	0	1	0.62599	2.42876	3.81	0.564788	0.395219	1.34129	0.622609	0.372446	12.6879	0.0258	0.04097	0.076396	0.0078	0.699765	0.07081	0.361704
61	2020	1	Shanxi	0	1	0	0	1	0.67142	2.48281	3.80759	0.569085	0.398786	1.23053	0.691275	0.422045	12.6879	0.033	0.041843	0.085029	0.0078	0.700749	0.056457	0.253538
62	2013	0	Shanxi	0	1	0	0	1	0.4566	1.6418	3.83321	0.470252	0.407349	1.02005	0.386714	0.541	11.9525	0.09	0.048597	0.048587	0.0032	0.866235	0.260284	0.201673
62	2014	0	Shanxi	0	1	0	0	1	0.50522	1.7607	3.83321	0.383034	0.46771	1.12848	0.380529	0.54489	11.9638	0.09	0.045451	0.053721	0.0058	1.22107	0.38967	0.242168
62	2015	0	Shanxi	0	1	0	0	1	0.54492	1.90159	3.83321	0.374167	0.478744	1.22018	0.368703	0.553477	12.0412	0.1	0.042415	0.054705	0.014	1.27949	0.393111	0.232755
62	2016	0	Shanxi	0	1	0	0	1	0.58063	2.01507	3.7782	0.358981	0.49195	1.25075	0.399143	0.611981	11.9632	0.05	0.040081	0.056781	0.014	1.37041	0.415256	0.257194
62	2017	0	Shanxi	0	1	0	0	1	0.62601	2.11457	3.78254	0.416426	0.451806	1.16197	0.321722	0.545865	12.1129	0.05	0.040089	0.056868	0.0083	1.08496	0.316428	0.101362
62	2018	0	Shanxi	0	1	0	0	1	0.67278	2.22066	3.78439	0.4579	0.424614	1.07764	0.405676	0.569344	12.262	0.0541	0.038341	0.059353	0.0085	0.927307	0.256575	0.170904
62	2019	0	Shanxi	0	1	0	0	1	0.74802	2.32411	3.78439	0.391752	0.501186	1.19612	0.51512	0.734602	12.4104	0.0607	0.037773	0.060494	0.0077	1.27934	0.273288	0.111852
62	2020	1	Shanxi	0	1	0	0	1	0.77981	2.39151	3.78254	0.376586	0.504558	1.16822	0.443979	0.744355	12.558	0.064	0.030295	0.06624	0.0077	1.33982	0.315613	0.111667
63	2013	0	Shanxi	0	1	0	0	1	0.5353	1.6754	3.19722	0.123807	0.51	1.51157	0.792651	0.619607	10.4968	0.18	0.019513	0.029049	0.0255	4.11931	2.95776	0.196255
63	2014	0	Shanxi	0	1	0	0	1	0.57946	1.78863	3.30259	0.106728	0.49275	1.56651	0.311729	0.51722	10.8218	0.19	0.018634	0.02174	0.0255	4.61688	3.75273	0.220159
63	2015	0	Shanxi	0	1	0	0	1	0.61158	1.90413	3.30259	0.137633	0.539548	1.59801	0.786509	0.569742	10.9578	0.19	0.01377	0.021349	0.0185	3.92019	2.3455	0.153401
63	2016	0	Shanxi	0	1	0	0	1	0.65103	2.01391	3.38785	0.138278	0.517315	1.64743	0.528666	0.489397	11.1083	0.12	0.015681	0.031652	0.0185	3.74112	2.49069	0.15439
63	2017	0	Shanxi	0	1	0	0	1	0.69736	2.12729	3.3906	0.110844	0.497195	1.62891	0.48483	0.533491	11.1563	0.14	0.014605	0.033429	0.0185	4.48553	3.53613	0.119042
63	2018	0	Shanxi	0	1	0	0	1	0.77004	2.2278	3.3906	0.12409	0.468593	1.62065	0.724026	0.537576	11.1631	0.1549	0.014592	0.033861	0.0225	3.77624	3.28243	0.111127
63	2019	1	Shanxi	0	1	0	0	1	0.8374	2.33591	3.39151	0.137515	0.478377	1.46655	0.779542	0.403596	11.164	0.1741	0.01429	0.040329	0.0225	3.47874	2.79321	0.13499
63	2020	1	Shanxi	0	1	0	0	1	0.88519	2.40594	3.3988	0.140261	0.521704	1.84051	0.990272	0.58258	11.1642	0.182	0.01378	0.040801	0.0225	3.71953	2.41004	0.117055
64	2013	0	Shanxi	0	1	0	0	1	0.5121	1.748	3.48491	0.142874	0.643687	1.74628	1.79368	0.471553	11.2398	0.16	0.033933	0.024525	0.018	4.50526	1.49389	0.192421
64	2014	0	Shanxi	0	1	0	0	1	0.5656	1.85058	3.48491	0.088804	0.643596	2.03752	2.23539	0.510577	11.1782	0.17	0.033647	0.0248	0.018	7.24735	3.01337	0.189129
64	2015	0	Shanxi	0	1	0	0	1	0.60718	1.96453	3.3979	0.093224	0.743418	2.44422	2.63962	0.595778	10.9734	0.18	0.024915	0.025076	0.018	7.97451	1.75231	0.159852
64	2016	0	Shanxi	0	1	0	0	1	0.63981	2.08567	3.40604	0.095821	0.710573	2.61358	2.31638	0.557522	11.2206	0.16	0.024049	0.025351	0.045	7.41565	2.0205	0.161685
64	2017	0	Shanxi	0	1	0	0	1	0.68407	2.17827	3.40964	0.113976	0.684121	2.54868	1.82621	0.546507	11.4061	0.16	0.024778	0.029171	0.045	6.00231	1.77144	0.167808
64	2018	0	Shanxi	0	1	0	0	1	0.7379	2.27478	3.41054	0.12143	0.683369	2.52457	0.730691	0.560587	11.5914	0.1909	0.023737	0.035205	0.045	5.62769	1.60753	0.190144
64	2019	1	Shanxi	0	1	0	0	1	0.80748	2.36299	3.41054	0.053879	0.784357	2.29906	0.568439	0.502045	11.7766	0.2183	0.029436	0.036903	0.032	14.5577	3.00235	0.171623
64	2020	1	Shanxi	0	1	0	0	1	0.85588	2.38124	3.41054	0.055606	0.782421	2.49394	0.693587	0.560043	11.9616	0.23	0.027776	0.037218	0.032	14.0709	2.9129	0.181456
65	2013	0	Shanxi	0	1	0	0	1	0.3721	1.4906	3.94444	0.56657	0.29348	1.46821	0.712441	0.677337	12.9884	0.1	0.057959	0.045209	0.009	0.517994	0.247012	0.438922
65	2014	0	Shanxi	0	1	0	0	1	0.40315	1.56483	3.94444	0.62332	0.285109	1.01738	0.626007	0.408369	13.3098	0.1	0.058694	0.046042	0.0089	0.457403	0.14691	0.400713
65	2015	0	Shanxi	0	1	0	0	1	0.42714	1.66036	3.94444	0.641767	0.288989	1.07	0.685994	0.395589	13.1544	0.1	0.057638	0.048397	0.0127	0.450302	0.107896	0.296334
65	2016	0	Shanxi	0	1	0	0	1	0.45346	1.75126	3.89037	0.553921	0.364924	1.42758	0.911548	0.516398	13.1215	0.11	0.057096	0.048624	0.0209	0.658801	0.14651	0.22691
65	2017	0	Shanxi	0	1	0	0	1	0.48436	1.83767	3.89536	0.594786	0.329424	1.33296	0.785168	0.417758	13.3589	0.08	0.057308	0.054292	0.0209	0.553853	0.127424	0.290758
65	2018	0	Shanxi	0	1	0	0	1	0.52441	1.92636	3.89702	0.645937	0.285884	1.13852	0.694371	0.433876	13.5963	0.08	0.058733	0.055243	0.02	0.442589	0.105551	0.291784
65	2019	1	Shanxi	0	1	0	0	1	0.56772	1.99726	3.89757	0.613729	0.313226	1.10615	0.661513	0.365437	13.8336	0.09	0.057454	0.048261	0.0296	0.510364	0.119018	0.307273
65	2020	1	Shanxi	0	1	0	0	1	0.60669	2.02046	3.90197	0.564327	0.354979	1.42834	0.923262	0.449649	14.071	0.08	0.060556	0.057422	0.0296	0.62903	0.142992	0.284642
66	2013	0	Shanxi	0	1	0	0	1	0.4535	1.9497	3.70805	0.690642	0.260222	1.01089	0.478114	0.178057	13.6549	0.1	0.052981	0.036144	0.004	0.376783	0.071145	0.497158
66	2014	0	Shanxi	0	1	0	0	1	0.5006	2.08332	3.70805	0.667194	0.282725	1.02056	0.450628	0.159141	13.7633	0.1	0.044498	0.036616	0.004	0.423752	0.075062	0.543405
66	2015	0	Shanxi	0	1	0	0	1	0.53397	2.24896	3.63906	0.663203	0.30615	1.11069	0.978269	0.166785	13.7734	0.11	0.042619	0.037128	0.004	0.461624	0.04621	0.357544
66	2016	0	Shanxi	0	1	0	0	1	0.57008	2.35412	3.70337	0.639441	0.319999	1.16319	0.939211	0.164385	13.7053	0.06	0.041603	0.037639	0.0183	0.500435	0.06343	0.423569
66	2017	0	Shanxi	0	1	0	0	1	0.62467	2.46808	3.70538	0.686024	0.275268	0.935482	0.769216	0.159478	13.6811	0.06	0.039282	0.03819	0.0166	0.401252	0.056424	0.357707
66	2018	0	Shanxi	0	1	0	0	1	0.69411	2.60892	3.70738	0.692243	0.270466	0.932502	0.704385	0.150847	13.6627	0.0618	0.03838	0.038372	0.015	0.390709	0.053869	0.36805
66	2019	1	Shanxi	0	1	0	0	1	0.73796	2.73549	3.70805	0.628157	0.337916	1.03387	0.720651	0.151651	13.6488	0.0655	0.037833	0.038962	0.0211	0.537948	0.054011	0.610495
66	2020	1	Shanxi	0	1	0	0	1	0.78938	2.79895	3.70605	0.618412	0.347933	1.10336	0.675447	0.208857	13.6383	0.064	0.03783	0.039921	0.037	0.562623	0.054422	0.422069
67	2013	0	Shanxi	0	1	0	0	1	0.5108	2.1085	3.83321	0.759676	0.191435	0.652046	0.370476	0.16368	13.7598	0.16	0.05524	0.057837	0.008	0.251996	0.064354	0.545822
67	2014	0	Shanxi	0	1	0	0	1	0.55498	2.26337	3.83321	0.729189	0.208072	0.941885	0.463903	0.193514	13.2394	0.16	0.044674	0.060456	0.0126	0.285347	0.086039	0.519018
67	2015	0	Shanxi	0	1	0	0	1	0.5846	2.41415	3.77259	0.72359	0.235938	1.05859	0.499146	0.195144	13.2115	0.17	0.049848	0.061046	0.0285	0.326066	0.055931	0.313472
67	2016	0	Shanxi	0	1	0	0	1	0.61892	2.52462	3.80457	0.71	0.240754	1.13344	0.526188	0.196985	13.2428	0.17	0.046824	0.057486	0.0293	0.33909	0.06936	0.28556
67	2017	0	Shanxi	0	1	0	0	1	0.66054	2.63432	3.8088	0.732845	0.227314	0.901323	0.353893	0.184998	13.2419	0.08	0.044234	0.065255	0.025	0.31018	0.054364	0.368393
67	2018	0	Shanxi	0	1	0	0	1	0.72352	2.74582	3.8088	0.737313	0.221754	0.890562	0.313603	0.200975	13.2415	0.0771	0.045571	0.068874	0.0303	0.30076	0.055516	0.326247
67	2019	1	Shanxi	0	1	0	0	1	0.77903	2.86301	3.8088	0.613098	0.335003	1.12961	0.393208	0.252272	13.2414	0.0775	0.039082	0.069864	0.03	0.54641	0.084649	0.385716
67	2020	1	Shanxi	0	1	0	0	1	0.81825	2.89902	3.8082	0.611238	0.331157	1.23902	0.518885	0.259881	13.2413	0.08	0.039119	0.073483	0.03	0.54178	0.094243	0.384169
68	2013	0	Shanxi	0	1	0	0	1	0.4753	1.6161	3.3979	0.326209	0.495003	1.16122	0.381214	0.368945	11.7981	0.15	0.030219	0.05246	0.011	1.51744	0.548081	0.210813
68	2014	0	Shanxi	0	1	0	0	1	0.51869	1.71813	3.3979	0.321892	0.508185	1.27122	0.357629	0.375795	11.9326	0.156	0.017488	0.030264	0.0072	1.57874	0.527889	0.20523
68	2015	0	Shanxi	0	1	0	0	1	0.54931	1.83766	3.30259	0.329363	0.513668	1.44863	0.454862	0.421341	11.3059	0.158	0.024376	0.031208	0.0072	1.55958	0.476586	0.171508
68	2016	0	Shanxi	0	1	0	0	1	0.58314	1.92726	3.44755	0.330571	0.519456	1.5232	0.442029	0.395443	11.3114	0.16	0.021753	0.03797	0.008	1.57139	0.45368	0.097239
68	2017	0	Shanxi	0	1	0	0	1	0.62228	2.01481	3.45014	0.418263	0.447443	1.45065	0.43171	0.430626	10.9427	0.05	0.01921	0.039184	0.008	1.06976	0.321076	0.174843
68	2018	0	Shanxi	0	1	0	0	1	0.67128	2.11795	3.45014	0.473962	0.415306	1.40124	0.426652	0.479319	11.3113	0.0466	0.017236	0.049253	0.0079	0.876244	0.23363	0.086803
68	2019	0	Shanxi	0	1	0	0	1	0.7483	2.20418	3.45014	0.482583	0.406043	1.45805	0.382521	0.584175	10.9428	0.0475	0.015942	0.049392	0.0079	0.841396	0.230787	0.105258
68	2020	1	Shanxi	0	1	0	0	1	0.79602	2.22122	3.40604	0.475124	0.411343	1.74298	0.57475	0.643825	11.3113	0.064	0.01542	0.054184	0.0072	0.865759	0.238955	0.112907
69	2013	0	Shanxi	0	1	0	0	1	0.3562	1.4634	3.3979	0.513804	0.205675	0.854851	0.505785	0.538691	11.6776	0.1	0.029729	0.028373	0.009	0.400298	0.545968	0.257417
69	2014	0	Shanxi	0	1	0	0	1	0.39116	1.55775	3.3979	0.456378	0.250063	0.937259	0.566463	0.492881	11.5435	0.11	0.028223	0.03085	0.009	0.547929	0.643237	0.130309
69	2015	0	Shanxi	0	1	0	0	1	0.42147	1.68166	3.3979	0.416455	0.274619	0.981461	0.581422	0.597949	11.3403	0.11	0.027586	0.030889	0.009	0.65942	0.741802	0.09223
69	2016	0	Shanxi	0	1	0	0	1	0.45075	1.78694	3.39425	0.412229	0.288293	1.03909	0.722798	0.569597	11.5313	0.09	0.026699	0.031838	0.009	0.699351	0.726487	0.097857
69	2017	0	Shanxi	0	1	0	0	1	0.49842	1.9052	3.39971	0.445237	0.291981	1.05647	0.708656	0.574665	11.5691	0.09	0.025938	0.031995	0.009	0.655789	0.590197	0.093097
69	2018	1	Shanxi	0	1	0	0	1	0.52639	1.98584	3.40243	0.399577	0.330784	1.20426	0.796271	0.635748	11.6042	0.0891	0.025406	0.035842	0.009	0.827836	0.674811	0.092483
69	2019	1	Shanxi	0	1	0	0	1	0.58784	2.06486	3.40424	0.307669	0.384863	1.23905	0.958281	0.604534	11.637	0.0959	0.024922	0.035031	0.008	1.2509	0.999348	0.099703
69	2020	1	Shanxi	0	1	0	0	1	0.67434	2.0968	3.40334	0.298031	0.354319	1.45501	1.07602	0.699026	11.6676	0.1	0.024838	0.040347	0.008	1.18887	1.16649	0.091288
70	2013	0	Shanxi	0	1	0	0	1	0.2249	1.4326	2.94591	0.089129	0.5672	1.71351	0.78344	1.70986	8.31874	0.05	0.014248	0.02074	0.0051	6.36382	3.8559	0.071783
70	2014	0	Shanxi	0	1	0	0	1	0.24986	1.52078	2.94591	0.10067	0.572332	1.67244	0.977438	1.53426	8.47073	0.06	0.012738	0.020903	0.0051	5.68524	3.24823	0.04799
70	2015	0	Shanxi	0	1	0	0	1	0.26293	1.61676	2.94591	0.109945	0.668634	1.91622	1.05173	1.85319	8.4722	0.06	0.011862	0.020466	0.0051	6.08155	2.01393	0.03952
70	2016	0	Shanxi	0	1	0	0	1	0.28093	1.69081	2.89762	0.107617	0.644021	1.95164	1.03968	1.6717	8.51097	0.04	0.01138	0.021321	0.0051	5.98438	2.30783	0.035853
70	2017	0	Shanxi	0	1	0	0	1	0.31592	1.77263	2.90061	0.110448	0.635633	1.90947	1.0539	2.06345	8.54745	0.037	0.010366	0.021753	0.0063	5.75501	2.29898	0.027275
70	2018	0	Shanxi	0	1	0	0	1	0.35537	1.85288	2.90509	0.135838	0.627771	1.79858	1.08737	2.07359	8.53054	0.0383	0.010553	0.02357	0.0028	4.62146	1.74024	0.027026
70	2019	0	Shanxi	0	1	0	0	1	0.41028	1.95536	2.90658	0.235946	0.595779	1.46095	0.793137	1.48971	8.53839	0.0402	0.010353	0.02727	0.0032	2.52506	0.713194	0.044137
70	2020	1	Shanxi	0	1	0	0	1	0.49174	1.99319	2.90658	0.292126	0.522705	1.57584	0.963639	1.52034	8.53474	0.044	0.010248	0.024705	0.0035	1.78931	0.633868	0.04113
71	2013	0	Shanxi	0	1	0	0	1	0.3937	1.7045	3.3979	0.176578	0.577296	1.5117	1.26258	0.829757	4.79248	0.11	0.030287	0.036396	0.0059	3.26935	1.39386	0.133413
71	2014	0	Shanxi	0	1	0	0	1	0.4358	1.80613	3.3979	0.158595	0.564387	1.48682	1.13303	0.825565	4.4332	0.11	0.028726	0.037104	0.0059	3.55866	1.7467	0.089084
71	2015	0	Shanxi	0	1	0	0	1	0.46545	1.95515	3.3979	0.170523	0.599486	1.5207	1.0283	0.849678	4.16356	0.12	0.028036	0.037905	0.0059	3.51557	1.34873	0.072207
71	2016	0	Shanxi	0	1	0	0	1	0.49601	2.03693	3.37211	0.161471	0.580725	1.55254	0.642767	0.845179	3.96272	0.09	0.027512	0.03856	0.0059	3.59647	1.5966	0.059398
71	2017	0	Shanxi	0	1	0	0	1	0.54404	2.14154	3.37491	0.154465	0.604416	1.56842	0.637961	0.951916	3.8111	0.091	0.028294	0.04073	0.0059	3.91296	1.56099	0.048989
71	2018	0	Shanxi	0	1	0	0	1	0.60504	2.22376	3.37955	0.147628	0.618565	1.67801	0.819284	0.969202	3.69883	0.0929	0.030465	0.041517	0.0059	4.19004	1.58377	0.054114
71	2019	1	Shanxi	0	1	0	0	1	0.67859	2.31652	3.38047	0.134949	0.621753	1.63993	1.32175	0.817284	3.61362	0.0991	0.031099	0.041651	0.003	4.60733	1.80289	0.062435
71	2020	1	Shanxi	0	1	0	0	1	0.75732	2.33439	3.38047	0.10456	0.58486	1.87586	1.32453	0.795105	3.54962	0.1	0.030691	0.04247	0.0082	5.59354	2.97035	0.062956
72	2013	0	Shanxi	0	1	0	0	1	0.2462	1.5495	2.94591	0.094697	0.506364	1.09002	0.586449	0.880855	9.98982	0.04	0.015455	0.017281	0.018	5.34722	4.21282	0.108448
72	2014	0	Shanxi	0	1	0	0	1	0.27149	1.6312	2.79176	0.105826	0.514429	1.11763	0.628134	1.08873	10.1303	0.04	0.013465	0.017418	0.018	4.86106	3.58837	0.061777
72	2015	0	Shanxi	0	1	0	0	1	0.29069	1.76905	2.94591	0.186508	0.547758	1.18436	0.522634	1.22367	10.2534	0.05	0.013123	0.017654	0.018	2.93692	1.42479	0.062769
72	2016	0	Shanxi	0	1	0	0	1	0.31149	1.87282	2.88251	0.175359	0.517507	1.33457	0.495721	0.995142	10.3149	0.04	0.012718	0.016355	0.018	2.95112	1.75153	0.096487
72	2017	0	Shanxi	0	1	0	0	1	0.34777	2.00046	2.88403	0.198569	0.566427	1.47652	0.553009	1.50516	10.3757	0.041	0.012404	0.016362	0.018	2.85254	1.18355	0.080847
72	2018	0	Shanxi	0	1	0	0	1	0.38507	2.12246	2.8901	0.178025	0.565869	1.58092	0.875688	1.60056	10.4245	0.0424	0.012239	0.013276	0.0141	3.17859	1.43865	0.078134
72	2019	0	Shanxi	0	1	0	0	1	0.43672	2.24196	2.8916	0.17011	0.612102	1.5569	1.0166	1.30635	10.4638	0.0462	0.012405	0.014338	0.01	3.59826	1.28027	0.091418
72	2020	1	Shanxi	0	1	0	0	1	0.51495	2.27887	2.8901	0.465609	0.374407	1.11669	0.780805	0.963107	10.4953	0.05	0.012465	0.021306	0.017	0.804123	0.3436	0.106721
73	2013	0	Shanxi	0	1	0	0	1	0.267	1.8625	3.70805	0.366277	0.496146	0.842057	0.078982	0.51295	12.0365	0.1	0.049925	0.035813	0.011	1.35456	0.375608	0.175534
73	2014	0	Shanxi	0	1	0	0	1	0.29027	1.98814	3.70805	0.338422	0.502802	0.853306	0.093234	0.497822	11.9253	0.11	0.04835	0.035819	0.0163	1.48572	0.469163	0.14944
73	2015	0	Shanxi	0	1	0	0	1	0.30652	2.15015	3.70805	0.309218	0.549873	0.937441	0.131412	0.514252	11.7015	0.11	0.045867	0.037438	0.013	1.77827	0.455679	0.056092
73	2016	0	Shanxi	0	1	0	0	1	0.32629	2.28053	3.70605	0.307482	0.552779	0.946155	0.223821	0.500196	11.9839	0.06	0.044609	0.036573	0.016	1.79776	0.454463	0.06302
73	2017	0	Shanxi	0	1	0	0	1	0.36183	2.42476	3.70938	0.336284	0.531762	0.854634	0.213417	0.537246	12.0541	0.05	0.04371	0.036809	0.008	1.58129	0.392387	0.052295
73	2018	0	Shanxi	0	1	0	0	1	0.40095	2.54878	3.71071	0.266661	0.597164	0.921742	0.222775	0.584941	12.0103	0.0597	0.042917	0.040627	0.008	2.23942	0.510669	0.055387
73	2019	0	Shanxi	0	1	0	0	1	0.45392	2.65508	3.71138	0.184469	0.675519	1.06115	0.298178	0.681629	12.0376	0.0637	0.041	0.039732	0.008	3.66197	0.759001	0.056541
73	2020	1	Shanxi	0	1	0	0	1	0.52956	2.68843	3.71138	0.200087	0.65112	1.11149	0.316182	0.65241	12.0206	0.07	0.038744	0.037691	0.008	3.25419	0.743643	0.067372
74	2013	0	Shanxi	0	1	0	0	1	0.323	1.5936	4.46574	0.829319	0.103642	0.578619	0.302646	0.328629	13.8308	0.14	0.070648	0.053811	0.005	0.124973	0.080837	0.382879
74	2014	0	Shanxi	0	1	0	0	1	0.34868	1.67132	4.46574	0.739258	0.189264	0.665421	0.746492	0.296121	13.8523	0.15	0.058883	0.054676	0.005	0.256019	0.096689	0.43489
74	2015	0	Shanxi	0	1	0	0	1	0.36839	1.771	4.46574	0.736879	0.210725	0.848436	0.953169	0.314465	13.8273	0.15	0.066723	0.056042	0.005	0.285969	0.071106	0.342751
74	2016	0	Shanxi	0	1	0	0	1	0.38741	1.84332	4.36557	0.721389	0.224364	0.984386	0.936845	0.339338	13.8885	0.15	0.063612	0.057639	0.012	0.311017	0.075197	0.347082
74	2017	0	Shanxi	0	1	0	0	1	0.42764	1.9271	4.37211	0.776114	0.177373	0.79662	0.739115	0.33516	14.0593	0.08	0.073942	0.064341	0.0102	0.228539	0.059931	0.463067
74	2018	0	Shanxi	0	1	0	0	1	0.47349	2.02568	4.37143	0.771571	0.180872	0.774527	0.683307	0.442486	14.2232	0.0787	0.049471	0.062373	0.0102	0.234421	0.061637	0.348945
74	2019	0	Shanxi	0	1	0	0	1	0.5292	2.12395	4.37108	0.726959	0.240877	0.76529	0.576923	0.380978	14.3804	0.0823	0.063607	0.06381	0.0302	0.331348	0.044245	0.410571
74	2020	1	Shanxi	0	1	0	0	1	0.55533	2.18969	4.37005	0.75811	0.209189	0.73321	0.490856	0.271185	14.5313	0.09	0.069096	0.0935	0.0302	0.275935	0.043135	0.391768
75	2013	0	Shanxi	0	1	0	0	1	0.3488	1.3131	5.17439	0.47878	0.280909	1.13525	1.20808	0.658982	12.6882	0.17	0.145874	0.115565	0.009	0.586717	0.501923	0.235096
75	2014	0	Shanxi	0	1	0	0	1	0.38201	1.39786	5.17439	0.324926	0.461122	1.17843	1.17483	0.545476	12.4243	0.19	0.135641	0.120174	0.01	1.41916	0.658465	0.245976
75	2015	0	Shanxi	0	1	0	0	1	0.40651	1.48403	5.17439	0.33159	0.515565	1.45472	1.12793	0.761536	12.1955	0.22	0.062293	0.12218	0.01	1.55482	0.460946	0.242997
75	2016	0	Shanxi	0	1	0	0	1	0.42996	1.56365	5.09501	0.274677	0.562633	1.65871	1.45923	0.799565	12.676	0.22	0.057976	0.119113	0.01	2.04835	0.592297	0.274527
75	2017	0	Shanxi	0	1	0	0	1	0.47546	1.64552	5.0985	0.372279	0.490719	1.4857	1.17819	0.746921	12.764	0.15	0.09473	0.13535	0.0322	1.31815	0.368011	0.364903
75	2018	0	Shanxi	0	1	0	0	1	0.52639	1.73298	5.09484	0.438352	0.437753	1.32412	1.02743	0.730297	12.8444	0.1648	0.094735	0.142817	0.0322	0.998634	0.28264	0.1362
75	2019	0	Shanxi	0	1	0	0	1	0.57293	1.80863	5.09184	0.447696	0.457712	1.21642	0.803258	0.623157	12.9177	0.1723	0.116087	0.159318	0.0308	1.02237	0.211285	0.1423
75	2020	1	Shanxi	0	1	0	0	1	0.61289	1.86815	5.08983	0.468256	0.409869	1.27928	0.82471	0.597621	12.9845	0.174	0.116642	0.168234	0.069	0.875309	0.260275	0.189108
76	2013	0	Shanxi	0	1	0	0	1	0.2363	1.0991	3.37024	0.227444	0.438193	1.76942	1.91498	1.23899	10.4716	0.06	0.042425	0.027695	0.002	1.9266	1.47009	0.070359
76	2014	0	Shanxi	0	1	0	0	1	0.25428	1.15705	3.35138	0.085699	0.601545	1.69309	1.69814	1.16404	10.195	0.06	0.03643	0.029405	0.002	7.01932	3.6495	0.058147
76	2015	0	Shanxi	0	1	0	0	1	0.26654	1.21602	3.34181	0.032428	0.715971	2.1374	2.13425	1.40184	9.20029	0.07	0.03458	0.031109	0.002	22.0787	7.75872	0.037494
76	2016	0	Shanxi	0	1	0	0	1	0.27822	1.26328	3.44842	0.017056	0.699015	2.22689	2.12953	1.25113	9.08023	0.06	0.039504	0.03166	0.002	40.9825	16.6464	0.026456
76	2017	0	Shanxi	0	1	0	0	1	0.31344	1.31945	3.45359	0.016537	0.724886	2.33843	1.95038	1.4943	8.8224	0.06	0.039221	0.03225	0.002	43.833	15.6358	0.030356
76	2018	0	Shanxi	0	1	0	0	1	0.35406	1.37404	3.45445	0.013084	0.719353	2.26312	1.9243	1.69328	9.08022	0.0567	0.039647	0.036945	0.002	54.9786	20.4493	0.02784
76	2019	0	Shanxi	0	1	0	0	1	0.39638	1.43796	3.45445	0.024009	0.722917	1.86763	1.59016	1.48917	8.82241	0.0651	0.03994	0.04722	0.01	30.1102	10.5408	0.023436
76	2020	1	Shanxi	0	1	0	0	1	0.42329	1.48666	3.45359	0.094691	0.635805	1.8009	1.3897	1.52082	9.08021	0.07	0.040468	0.04918	0.01	6.71451	2.84614	0.020877
77	2013	0	Shanxi	0	1	0	0	1	0.334	1.591	3.58776	0.697213	0.247391	0.702141	0.411434	0.365679	13.0083	0.1156	0.044388	0.030973	0.0214	0.354828	0.079455	0.364227
77	2014	0	Shanxi	0	1	0	0	1	0.36117	1.6727	3.56495	0.647009	0.297315	0.716869	0.417472	0.382086	12.8477	0.1161	0.039715	0.037981	0.025	0.459522	0.08605	0.352721
77	2015	0	Shanxi	0	1	0	0	1	0.37944	1.77012	3.5416	0.559311	0.373794	0.950892	0.524613	0.504352	12.6018	0.117	0.03936	0.039025	0.008	0.668312	0.119601	0.221644
77	2016	0	Shanxi	0	1	0	0	1	0.40056	1.84583	3.52573	0.54626	0.388582	1.03509	0.484987	0.576107	12.6042	0.118	0.036775	0.040169	0.008	0.711351	0.11928	0.226425
77	2017	0	Shanxi	0	1	0	0	1	0.42668	1.9316	3.50144	0.662234	0.284343	0.808037	0.195641	0.422762	12.5495	0.05	0.03642	0.040607	0.0258	0.429369	0.080672	0.273852
77	2018	0	Shanxi	0	1	0	0	1	0.46071	2.01328	3.47654	0.653997	0.288887	0.798825	0.480976	0.442183	12.5017	0.05	0.033096	0.045657	0.0266	0.441725	0.087335	0.28286
77	2019	1	Shanxi	0	1	0	0	1	0.51036	2.10511	3.43361	0.695255	0.242213	0.672631	0.29958	0.318723	12.4598	0.054	0.034203	0.048224	0.0242	0.34838	0.089941	0.316314
77	2020	1	Shanxi	0	1	0	0	1	0.53407	2.13567	3.41591	0.695547	0.243022	0.677748	0.319496	0.384868	12.4232	0.0548	0.032011	0.047779	0.026	0.349396	0.088321	0.248229
78	2013	0	Shanxi	0	1	0	0	1	0.487	1.6455	3.63906	0.84061	0.140555	0.803337	0.858806	0.178971	14.2942	0.12	0.061271	0.03918	0.0178	0.167206	0.022406	0.599596
78	2014	0	Shanxi	0	1	0	0	1	0.53315	1.74359	3.63906	0.752034	0.224384	0.875261	0.847788	0.210883	14.1348	0.13	0.058521	0.037088	0.0178	0.29837	0.031357	0.546009
78	2015	0	Shanxi	0	1	0	0	1	0.56603	1.85623	3.63906	0.64336	0.331742	1.3188	1.21326	0.273451	13.6766	0.13	0.056475	0.040663	0.0178	0.515639	0.038701	0.352847
78	2016	0	Shanxi	0	1	0	0	1	0.60035	1.95221	3.63189	0.633146	0.336327	1.38351	1.10792	0.262803	13.7179	0.06	0.055004	0.041377	0.018	0.531199	0.048214	0.310836
78	2017	0	Shanxi	0	1	0	0	1	0.64304	2.06216	3.63189	0.723485	0.254183	1.00964	0.754858	0.205937	13.7122	0.05	0.054492	0.041117	0.018	0.351331	0.030868	0.458921
78	2018	1	Shanxi	0	1	0	0	1	0.68669	2.15751	3.63189	0.753694	0.229396	0.87797	0.58035	0.209601	13.713	0.054	0.053853	0.043479	0.016	0.304362	0.022436	0.591644
78	2019	1	Shanxi	0	1	0	0	1	0.73668	2.24754	3.63189	0.761187	0.209779	0.758359	0.437295	0.179525	13.7129	0.058	0.05269	0.045148	0.015	0.275595	0.038143	0.608223
78	2020	1	Shanxi	0	1	0	0	1	0.77167	2.27577	3.62467	0.778421	0.196384	0.781417	0.384716	0.15372	13.7129	0.0592	0.043733	0.047688	0.011	0.252284	0.032367	0.537942
79	2013	0	Inner Mongoria	0	0	1	1	0	0.5385	1.9136	3.83321	0.584689	0.282509	0.307513	0.31333	0.170028	13.0145	0.31	0.03241	0.041459	0.045	0.483179	0.227132	0.261661
79	2014	0	Inner Mongoria	0	0	1	1	0	0.5818	1.98271	3.89037	0.553289	0.319354	0.335854	0.369981	0.190573	13.0738	0.33	0.030086	0.037012	0.0374	0.577192	0.230182	0.164385
79	2015	0	Inner Mongoria	0	0	1	1	0	0.61556	2.07608	3.83321	0.522413	0.362467	0.377656	0.454945	0.191433	12.2909	0.35	0.027755	0.038257	0.044	0.693832	0.220361	0.121416
79	2016	0	Inner Mongoria	0	0	1	1	0	0.66656	2.2279	3.85417	0.522972	0.371947	0.434161	0.507837	0.200601	12.1871	0.37	0.025186	0.045993	0.0782	0.711217	0.20093	0.125079
79	2017	0	Inner Mongoria	0	0	1	1	0	0.72378	2.37558	3.49486	0.2764	0.562232	0.810899	1.0508	0.312624	12.1653	0.33	0.022909	0.040839	0.045	2.03413	0.58382	0.150502
79	2018	0	Inner Mongoria	0	0	1	1	0	0.80041	2.51054	3.83966	0.251291	0.580621	0.843931	0.985993	0.296931	12.143	0.34	0.021395	0.040406	0.047	2.31055	0.668897	0.153738
79	2019	1	Inner Mongoria	0	0	1	1	0	0.8958	2.5744	3.82968	0.241161	0.578116	0.957679	1.02189	0.325011	12.1203	0.344	0.020974	0.041658	0.039	2.39722	0.749386	0.15347
79	2020	1	Inner Mongoria	0	0	1	1	0	0.97869	2.53063	3.81959	0.255859	0.563672	1.01346	1.16218	0.35518	12.1077	0.35	0.020493	0.04767	0.0864	2.20305	0.705343	0.138937
80	2013	0	Inner Mongoria	0	0	1	1	0	0.616	1.7301	4.4012	0.487513	0.337962	0.272753	0.297746	0.254751	14.0783	0.54	0.08626	0.109981	0.051	0.693237	0.357991	0.118742
80	2014	0	Inner Mongoria	0	0	1	1	0	0.67225	1.87267	4.4012	0.462377	0.358466	0.279516	0.357127	0.240656	13.8193	0.58	0.080008	0.109627	0.0775	0.775269	0.387469	0.13335
80	2015	0	Inner Mongoria	0	0	1	1	0	0.71921	2.01827	4.4012	0.444758	0.385876	0.293807	0.435745	0.2659	13.8959	0.64	0.078871	0.110177	0.0775	0.867609	0.380806	0.120211
80	2016	0	Inner Mongoria	0	0	1	1	0	0.76629	2.17385	4.39384	0.440534	0.395035	0.329005	0.467748	0.260045	13.949	0.7	0.077767	0.136739	0.0672	0.896719	0.373253	0.121686
80	2017	0	Inner Mongoria	0	0	1	1	0	0.94522	2.32528	4.39518	0.262695	0.494973	0.640503	0.940881	0.414524	13.6217	0.62	0.076393	0.124353	0.0631	1.88421	0.922486	0.086199
80	2018	0	Inner Mongoria	0	0	1	1	0	0.88799	2.4551	4.3752	0.205901	0.550878	0.674513	0.959147	0.422015	13.1321	0.64	0.075558	0.134864	0.0546	2.67545	1.18125	0.132774
80	2019	0	Inner Mongoria	0	0	1	1	0	0.96428	2.5656	4.37622	0.238084	0.530834	0.715636	0.89838	0.392776	12.1333	0.66	0.077256	0.157835	0.0546	2.22961	0.970589	0.110386
80	2020	1	Inner Mongoria	0	0	1	1	0	1.02771	2.67149	4.37451	0.23892	0.512974	0.872774	0.981576	0.377571	12.4974	0.68	0.072512	0.166406	0.0546	2.14705	1.03845	0.099943
81	2013	0	Inner Mongoria	0	0	1	1	0	0.6515	1.8829	4.58352	0.523637	0.28843	0.335703	0.254126	0.210181	14.3428	0.43	0.102085	0.106374	0.118	0.550821	0.3589	0.183718
81	2014	0	Inner Mongoria	0	0	1	1	0	0.71261	2.033	4.58352	0.531453	0.287037	0.363615	0.306368	0.201957	14.4502	0.47	0.101645	0.117821	0.1901	0.540098	0.341535	0.193903
81	2015	0	Inner Mongoria	0	0	1	1	0	0.76311	2.17321	4.55535	0.503913	0.318695	0.400421	0.361342	0.250011	14.1477	0.5	0.100002	0.127601	0.1746	0.63244	0.35203	0.162136
81	2016	0	Inner Mongoria	0	0	1	1	0	0.81592	2.32657	4.54703	0.490866	0.33315	0.439724	0.406808	0.210498	14.1548	0.53	0.106021	0.116363	0.1811	0.678698	0.358518	0.202521
81	2017	0	Inner Mongoria	0	0	1	1	0	0.87194	2.48412	4.58518	0.343183	0.402689	0.736667	0.900363	0.377889	13.9125	0.37	0.099297	0.145235	0.1873	1.1734	0.740505	0.160092
81	2018	0	Inner Mongoria	0	0	1	1	0	0.94547	2.63749	4.52636	0.308774	0.441275	0.739722	0.911182	0.35948	13.5921	0.28	0.104559	0.151646	0.1902	1.42912	0.809498	0.156466
81	2019	0	Inner Mongoria	0	0	1	1	0	1.02858	2.74836	4.52518	0.301943	0.485617	0.692763	0.797328	0.310152	13.1177	0.25	0.104641	0.152358	0.1902	1.60831	0.703575	0.14705
81	2020	1	Inner Mongoria	0	0	1	1	0	1.10092	2.85333	4.53835	0.321802	0.459615	0.73356	0.861681	0.301946	12.8352	0.24	0.1049	0.152086	0.1902	1.42825	0.679248	0.110165
82	2013	0	Inner Mongoria	0	0	1	1	0	0.6671	1.7288	3.94444	0.566311	0.273985	0.364374	0.479829	0.290774	13.8189	0.34	0.053793	0.069326	0.0778	0.483807	0.282007	0.184294
82	2014	0	Inner Mongoria	0	0	1	1	0	0.7319	1.87257	3.94444	0.567781	0.277821	0.37116	0.539538	0.279115	13.9548	0.37	0.051412	0.06594	0.0778	0.48931	0.271931	0.192654
82	2015	0	Inner Mongoria	0	0	1	1	0	0.7852	2.01818	3.94444	0.542403	0.310049	0.383613	0.570935	0.286039	14.0484	0.38	0.0515	0.084467	0.0778	0.571621	0.272028	0.187933
82	2016	0	Inner Mongoria	0	0	1	1	0	0.83803	2.17375	3.91561	0.543029	0.314571	0.415767	0.646473	0.291942	14.1282	0.41	0.051341	0.077386	0.1094	0.579288	0.262232	0.182069
82	2017	0	Inner Mongoria	0	0	1	1	0	0.89804	2.32518	3.85071	0.388081	0.395228	0.747308	1.27319	0.480441	13.8025	0.39	0.050177	0.081311	0.1094	1.01842	0.558368	0.119416
82	2018	0	Inner Mongoria	0	0	1	1	0	0.97287	2.47108	3.90252	0.280629	0.499297	0.783023	1.28346	0.517972	13.3166	0.39	0.049916	0.08593	0.0352	1.77921	0.78422	0.106669
82	2019	1	Inner Mongoria	0	0	1	1	0	1.05561	2.58465	3.90087	0.235672	0.53875	0.836417	1.40889	0.420865	12.3337	0.4	0.047674	0.08646	0.0352	2.28601	0.957169	0.104607
82	2020	1	Inner Mongoria	0	0	1	1	0	1.1245	2.69233	3.89977	0.236392	0.523181	0.966832	1.38446	0.518035	11.5387	0.404	0.047975	0.089808	0.0352	2.2132	1.01707	0.18144
83	2013	0	Inner Mongoria	0	0	1	1	0	0.6148	1.8512	4.00072	0.473626	0.346774	0.490196	0.492659	0.312627	13.7515	0.29	0.069413	0.096858	0.11	0.732168	0.379203	0.15137
83	2014	0	Inner Mongoria	0	0	1	1	0	0.67107	2.00082	3.99573	0.474248	0.353651	0.505615	0.525272	0.288563	13.893	0.31	0.063084	0.09615	0.125	0.74571	0.362892	0.163766
83	2015	0	Inner Mongoria	0	0	1	1	0	0.71814	2.14655	3.98568	0.461835	0.375263	0.527229	0.497499	0.296917	13.9943	0.34	0.056216	0.094734	0.125	0.812547	0.352732	0.175868
83	2016	0	Inner Mongoria	0	0	1	1	0	0.76639	2.30359	3.98568	0.467402	0.375887	0.552523	0.524957	0.252573	14.0609	0.36	0.0557	0.09619	0.125	0.804204	0.335281	0.182268
83	2017	0	Inner Mongoria	0	0	1	1	0	0.82419	2.45954	3.98871	0.443383	0.376088	0.732191	0.719381	0.35574	13.8383	0.37	0.053646	0.118769	0.125	0.848224	0.407163	0.138886
83	2018	1	Inner Mongoria	0	0	1	1	0	0.893	2.60657	3.94444	0.412327	0.41777	0.719803	0.701972	0.347104	13.5517	0.38	0.052416	0.118524	0.125	1.0132	0.412059	0.13334
83	2019	1	Inner Mongoria	0	0	1	1	0	0.96809	2.73149	3.89037	0.313459	0.503155	0.866532	0.694152	0.37746	13.1482	0.4	0.052157	0.119677	0.0745	1.60517	0.585038	0.128947
83	2020	1	Inner Mongoria	0	0	1	1	0	1.03954	2.85139	3.92316	0.336992	0.477637	0.952292	0.73688	0.381495	12.8826	0.41	0.047829	0.121212	0.0898	1.41735	0.550073	0.128461
84	2013	0	Inner Mongoria	0	0	1	1	0	0.6608	1.8536	4.89182	0.456863	0.245426	0.347998	0.302932	0.22379	14.4179	0.71	0.112583	0.126897	0.089	0.537199	0.651642	0.126268
84	2014	0	Inner Mongoria	0	0	1	1	0	0.72895	2.00741	4.8712	0.4434	0.263894	0.356693	0.361015	0.217642	14.5488	0.75	0.109631	0.105077	0.1178	0.595161	0.66014	0.130729
84	2015	0	Inner Mongoria	0	0	1	1	0	0.78345	2.15754	4.89182	0.440917	0.274468	0.404636	0.382781	0.224503	14.6326	0.81	0.106249	0.118178	0.1169	0.622494	0.645507	0.129395
84	2016	0	Inner Mongoria	0	0	1	1	0	0.83476	2.30685	4.87391	0.439497	0.280516	0.412763	0.425283	0.226233	14.6648	0.87	0.105856	0.122405	0.1169	0.638266	0.637065	0.134875
84	2017	0	Inner Mongoria	0	0	1	1	0	0.89539	2.45623	4.78146	0.31856	0.310852	0.617517	0.739739	0.321535	14.3089	0.76	0.101807	0.112665	0.099	0.975803	1.16332	0.117412
84	2018	0	Inner Mongoria	0	0	1	1	0	0.96655	2.59338	4.86493	0.229795	0.369903	0.701065	0.813407	0.342619	13.7511	0.79	0.102042	0.110802	0.099	1.60971	1.742	0.126366
84	2019	0	Inner Mongoria	0	0	1	1	0	1.04863	2.70754	4.86304	0.200375	0.453399	0.693592	0.731591	0.306214	12.3781	0.82	0.105526	0.111592	0.1051	2.26275	1.72789	0.100089
84	2020	1	Inner Mongoria	0	0	1	1	0	1.12344	2.84362	4.85672	0.205129	0.439921	0.807726	0.707805	0.326604	10.9181	0.85	0.104659	0.132254	0.0652	2.1446	1.73037	0.097234
85	2013	0	Inner Mongoria	0	0	1	1	0	0.7206	1.8851	4.55535	0.438999	0.370463	0.734805	0.597424	0.323481	13.5825	0.33	0.096307	0.080145	0.12	0.84388	0.434027	0.226449
85	2014	0	Inner Mongoria	0	0	1	1	0	0.7881	2.0332	4.55535	0.417893	0.392069	0.814278	0.673368	0.317603	13.462	0.35	0.094891	0.099728	0.142	0.938203	0.454752	0.206099
85	2015	0	Inner Mongoria	0	0	1	1	0	0.84632	2.1737	4.55535	0.411177	0.404099	0.757494	0.570081	0.341848	13.5058	0.38	0.09344	0.093249	0.1181	0.982787	0.449258	0.197148
85	2016	0	Inner Mongoria	0	0	1	1	0	0.90208	2.32695	4.54818	0.408262	0.411561	0.900848	0.652659	0.345502	13.4186	0.4	0.092275	0.096227	0.126	1.00808	0.441322	0.182459
85	2017	0	Inner Mongoria	0	0	1	1	0	0.96489	2.4844	4.31963	0.355273	0.422741	1.25564	0.898266	0.433427	13.6365	0.259	0.09096	0.099315	0.126	1.1899	0.624833	0.153246
85	2018	0	Inner Mongoria	0	0	1	1	0	1.04242	2.62551	4.54183	0.309185	0.47391	1.2561	0.899615	0.411664	13.8154	0.26	0.091727	0.100244	0.0938	1.53277	0.701539	0.160481
85	2019	1	Inner Mongoria	0	0	1	1	0	1.12798	2.73339	4.5427	0.314053	0.50431	1.19788	0.923984	0.341764	13.967	0.264	0.091523	0.108423	0.0886	1.60581	0.578366	0.143968
85	2020	1	Inner Mongoria	0	0	1	1	0	1.20566	2.83549	4.5172	0.347015	0.469227	1.32066	1.01441	0.348696	14.0398	0.2646	0.089914	0.109742	0.1348	1.35218	0.529542	0.154431
86	2013	0	Inner Mongoria	0	0	1	1	0	0.6947	2.0374	5.11087	0.435832	0.344807	0.64431	0.470842	0.19557	14.343	0.49	0.165912	0.223935	0.098	0.791147	0.503316	0.18763
86	2014	0	Inner Mongoria	0	0	1	1	0	0.76684	2.20004	5.12713	0.420206	0.362077	0.657859	0.481643	0.183612	14.3989	0.53	0.166477	0.228115	0.098	0.861665	0.518122	0.211942
86	2015	0	Inner Mongoria	0	0	1	1	0	0.82821	2.36893	5.12713	0.422778	0.377833	0.69661	0.481109	0.201569	14.4624	0.56	0.16464	0.235503	0.098	0.893691	0.471612	0.197671
86	2016	0	Inner Mongoria	0	0	1	1	0	0.88631	2.54459	5.11839	0.417233	0.380773	0.681996	0.487737	0.193361	14.4342	0.61	0.167904	0.243683	0.098	0.912616	0.484125	0.201593
86	2017	0	Inner Mongoria	0	0	1	1	0	0.9472	2.71936	4.97893	0.312414	0.41931	1.02369	0.74184	0.260993	14.2101	0.42	0.169998	0.258681	0.098	1.34216	0.858719	0.134694
86	2018	0	Inner Mongoria	0	0	1	1	0	1.02431	2.87922	5.10363	0.28847	0.449297	1.06088	0.740312	0.286257	13.9208	0.44	0.158802	0.262444	0.098	1.55752	0.909046	0.11891
86	2019	1	Inner Mongoria	0	0	1	1	0	1.11338	2.99469	5.10363	0.216868	0.51415	1.17184	0.780351	0.272291	13.512	0.434	0.148297	0.27934	0.0744	2.3708	1.2403	0.122233
86	2020	1	Inner Mongoria	0	0	1	1	0	1.19904	3.10034	5.09284	0.223459	0.495674	1.31757	0.922131	0.320564	13.2233	0.4349	0.14959	0.329164	0.1347	2.21819	1.2569	0.111327
87	2013	0	Inner Mongoria	0	0	1	1	0	0.7186	1.8814	5.11087	0.485695	0.256395	0.417356	0.236658	0.188895	13.5849	0.7	0.173638	0.142176	0.0948	0.527893	0.53101	0.16155
87	2014	0	Inner Mongoria	0	0	1	1	0	0.78791	2.02956	5.11087	0.431064	0.310694	0.42967	0.29064	0.190295	13.6309	0.83	0.158369	0.145354	0.0948	0.720761	0.599082	0.290038
87	2015	0	Inner Mongoria	0	0	1	1	0	0.84593	2.17302	5.11087	0.425679	0.324548	0.479726	0.299483	0.215634	13.565	0.87	0.161785	0.161896	0.1089	0.762424	0.586764	0.223016
87	2016	0	Inner Mongoria	0	0	1	1	0	0.90343	2.32686	5.11005	0.422932	0.333064	0.506724	0.318841	0.20132	13.6081	0.88	0.158976	0.195177	0.1089	0.787512	0.576936	0.167393
87	2017	0	Inner Mongoria	0	0	1	1	0	0.9664	2.48431	4.97255	0.245517	0.399514	0.831632	0.575388	0.329645	13.3804	0.89	0.165705	0.207997	0.1088	1.62724	1.4458	0.115413
87	2018	0	Inner Mongoria	0	0	1	1	0	1.04502	2.62793	5.10347	0.197409	0.457024	0.880138	0.635104	0.349082	13.0851	0.96	0.167458	0.207997	0.1088	2.31511	1.75052	0.087506
87	2019	0	Inner Mongoria	0	0	1	1	0	1.13488	2.75126	5.10248	0.174294	0.48411	0.938892	0.624496	0.374959	12.6641	1.04	0.160605	0.26415	0.1088	2.77755	1.95988	0.083679
87	2020	1	Inner Mongoria	0	0	1	1	0	1.21008	2.87064	5.08631	0.186819	0.463465	1.05615	0.66343	0.333246	12.2605	1.12	0.157628	0.245728	0.1095	2.48082	1.87195	0.086658
88	2013	0	Inner Mongoria	0	0	1	1	0	0.7435	1.7641	4.97029	0.397017	0.34064	0.148252	0.187234	0.185816	14.5685	1.22	0.109894	0.065814	0.0563	0.858	0.660787	0.09852
88	2014	0	Inner Mongoria	0	0	1	1	0	0.81734	1.90495	4.97029	0.390011	0.351556	0.145735	0.20516	0.201685	14.4143	1.26	0.095329	0.09053	0.1099	0.9014	0.662632	0.153254
88	2015	0	Inner Mongoria	0	0	1	1	0	0.87561	2.04445	4.95124	0.387036	0.360211	0.157817	0.253234	0.245543	14.5897	1.32	0.094462	0.092576	0.0885	0.930692	0.653048	0.095743
88	2016	0	Inner Mongoria	0	0	1	1	0	0.93324	2.18847	4.96859	0.381034	0.373084	0.172988	0.239023	0.210499	14.641	1.36	0.093824	0.123493	0.0885	0.979136	0.645301	0.11398
88	2017	0	Inner Mongoria	0	0	1	1	0	0.99949	2.33397	4.89732	0.112544	0.413228	0.414777	0.410681	0.354509	14.2896	1.36	0.11198	0.110774	0.0819	3.67171	4.21371	0.177229
88	2018	0	Inner Mongoria	0	0	1	1	0	1.0818	2.48259	4.95297	0.121022	0.396314	0.405683	0.378954	0.410996	13.7432	1.43	0.109017	0.172258	0.061	3.27473	3.98823	0.084439
88	2019	0	Inner Mongoria	0	0	1	1	0	1.17587	2.60887	4.95144	0.196117	0.386485	0.426162	0.302301	0.361021	12.4447	1.49	0.106348	0.16832	0.061	1.97069	2.12832	0.086213
88	2020	1	Inner Mongoria	0	0	1	1	0	1.2711	2.72581	4.94642	0.170049	0.387855	0.497899	0.337589	0.333267	11.4159	1.56	0.104753	0.177831	0.0578	2.28084	2.59982	0.059639
89	2013	0	Inner Mongoria	0	0	1	1	0	0.7894	1.7793	4.71357	0.411232	0.360085	0.160135	0.23859	0.174875	14.5364	1.18	0.107876	0.083775	0.029	0.875626	0.556094	0.128222
89	2014	0	Inner Mongoria	0	0	1	1	0	0.86596	1.92759	4.71357	0.406424	0.375792	0.163827	0.245389	0.178035	14.5101	1.2	0.109364	0.095511	0.037	0.92463	0.535856	0.145711
89	2015	0	Inner Mongoria	0	0	1	1	0	0.92476	2.07044	4.71357	0.402981	0.384956	0.174988	0.41833	0.208279	14.513	1.04	0.110079	0.086584	0.0389	0.955269	0.526235	0.133472
89	2016	0	Inner Mongoria	0	0	1	1	0	0.98498	2.21761	4.70254	0.400553	0.402205	0.192998	0.466389	0.17917	14.5491	1.08	0.110037	0.206623	0.0336	1.00412	0.492423	0.15946
89	2017	0	Inner Mongoria	0	0	1	1	0	1.05102	2.35941	4.57543	0.149757	0.43859	0.503106	0.974922	0.384068	14.2289	1.08	0.108666	0.237344	0.0336	2.92868	2.74881	0.130485
89	2018	0	Inner Mongoria	0	0	1	1	0	1.13965	2.51203	4.69262	0.193503	0.402394	0.467699	0.735272	0.374219	13.7552	1.09	0.108022	0.238918	0.0347	2.07952	2.08836	0.105287
89	2019	1	Inner Mongoria	0	0	1	1	0	1.2399	2.63245	4.69163	0.198279	0.435068	0.443984	0.611336	0.300442	12.8237	1.08	0.106569	0.250837	0.0273	2.19421	1.84917	0.09682
89	2020	1	Inner Mongoria	0	0	1	1	0	1.25088	2.73985	4.68763	0.182936	0.424326	0.524966	0.526012	0.27465	11.9957	1.09	0.104263	0.148623	0.0444	2.31954	2.14686	0.089168
90	2013	0	Inner Mongoria	0	0	1	1	0	0.6972	1.6928	3.89037	0.39329	0.332079	0.223059	0.130822	0.242489	13.4568	0.32	0.039173	0.054025	0.017	0.844361	0.698294	0.164443
90	2014	0	Inner Mongoria	0	0	1	1	0	0.76734	1.83576	3.89037	0.390152	0.341411	0.220543	0.169984	0.230647	13.6058	0.35	0.039976	0.052133	0.033	0.875073	0.688031	0.199683
90	2015	0	Inner Mongoria	0	0	1	1	0	0.82393	1.97516	3.89037	0.385461	0.352729	0.238868	0.189013	0.277555	13.7479	0.38	0.05008	0.056905	0.0288	0.915083	0.679215	0.175032
90	2016	0	Inner Mongoria	0	0	1	1	0	0.88189	2.11682	3.88536	0.38218	0.374003	0.255557	0.216857	0.268489	13.842	0.39	0.050676	0.067326	0.0253	0.978605	0.637965	0.180528
90	2017	0	Inner Mongoria	0	0	1	1	0	0.94304	2.25918	3.79545	0.112642	0.432187	0.521383	0.458663	0.397327	13.4924	0.4	0.048852	0.071495	0.0272	3.8368	4.04084	0.070872
90	2018	0	Inner Mongoria	0	0	1	1	0	1.02162	2.40087	3.87751	0.119391	0.441343	0.532078	0.512003	0.449203	12.9503	0.43	0.048107	0.072852	0.0131	3.69662	3.67922	0.064614
90	2019	0	Inner Mongoria	0	0	1	1	0	1.11347	2.52533	3.87582	0.073425	0.576897	0.558088	0.444502	0.414793	11.6787	0.47	0.046947	0.096292	0.0284	7.85693	4.76236	0.047273
90	2020	1	Inner Mongoria	0	0	1	1	0	1.21061	2.63952	3.873	0.06537	0.56	0.653289	0.540789	0.34437	10.5304	0.51	0.045819	0.094404	0.0213	8.56657	5.73088	0.053667
91	2013	0	Inner Mongoria	0	0	1	1	0	0.7209	1.7658	4.80666	0.467011	0.331314	0.272587	0.234124	0.195467	14.6819	0.81	0.133487	0.100514	0.0196	0.709435	0.431844	0.165067
91	2014	0	Inner Mongoria	0	0	1	1	0	0.79165	1.91017	4.80666	0.453738	0.340963	0.269108	0.225413	0.195279	14.2303	0.89	0.133404	0.09796	0.0448	0.751452	0.452461	0.180588
91	2015	0	Inner Mongoria	0	0	1	1	0	0.84914	2.05263	4.80666	0.449914	0.349361	0.312871	0.284912	0.231791	14.2023	0.92	0.134742	0.107145	0.0506	0.776507	0.446142	0.131246
91	2016	0	Inner Mongoria	0	0	1	1	0	0.9068	2.20511	4.80109	0.443914	0.369177	0.330329	0.029782	0.217042	14.2137	0.99	0.131822	0.120597	0.0578	0.831642	0.421048	0.143024
91	2017	0	Inner Mongoria	0	0	1	1	0	0.97169	2.35071	4.7455	0.219065	0.376532	0.900611	0.720692	0.479197	13.9263	1.02	0.084647	0.126316	0.0495	1.71881	1.84604	0.095824
91	2018	0	Inner Mongoria	0	0	1	1	0	1.04976	2.4981	4.79616	0.199719	0.375688	0.854596	0.612997	0.530941	13.5216	1.09	0.131086	0.146388	0.0429	1.88109	2.12596	0.087371
91	2019	0	Inner Mongoria	0	0	1	1	0	1.14213	2.62274	4.79729	0.250746	0.456085	0.669086	0.400194	0.362529	12.8306	1.16	0.13262	0.166843	0.07	1.81891	1.16919	0.116674
91	2020	1	Inner Mongoria	0	0	1	1	0	1.23242	2.73932	4.79234	0.21264	0.472657	0.812274	0.4994	0.338633	12.393	1.24	0.134354	0.178213	0.0805	2.22281	1.47998	0.074745
92	2013	0	Inner Mongoria	0	0	1	1	0	0.6714	1.5914	4.49651	0.238912	0.279975	0.243245	0.243648	0.231151	12.9994	0.77	0.068653	0.083732	0.127	1.17187	2.01376	0.10873
92	2014	0	Inner Mongoria	0	0	1	1	0	0.73023	1.71833	4.49651	0.237163	0.285319	0.238874	0.345529	0.252392	12.5771	0.81	0.061658	0.087725	0.127	1.20305	2.01346	0.107922
92	2015	0	Inner Mongoria	0	0	1	1	0	0.78199	1.84008	4.46574	0.240194	0.307274	0.291971	0.399698	0.268046	12.3482	0.95	0.067604	0.092495	0.1294	1.27928	1.88403	0.107912
92	2016	0	Inner Mongoria	0	0	1	1	0	0.83457	1.95102	4.46355	0.242093	0.337971	0.316331	0.492484	0.277445	12.3958	1.04	0.054788	0.089671	0.1306	1.39604	1.73461	0.090124
92	2017	0	Inner Mongoria	0	0	1	1	0	0.89104	2.06583	4.33506	0.056669	0.390875	0.526945	0.735523	0.4067	12.0257	1.15	0.04146	0.090897	0.1165	6.8975	9.74881	0.075063
92	2018	0	Inner Mongoria	0	0	1	1	0	0.96098	2.18124	4.46449	0.0484	0.3665	0.479517	0.639803	0.36734	11.4318	1.309	0.072824	0.089584	0.1165	7.57225	12.0887	0.076618
92	2019	0	Inner Mongoria	0	0	1	1	0	1.03801	2.26867	4.45442	0.058975	0.329067	0.644077	0.682195	0.405596	9.76491	1.31	0.072369	0.097312	0.1108	5.57978	10.3766	0.089421
92	2020	1	Inner Mongoria	0	0	1	1	0	0.97693	2.37591	4.47321	0.048989	0.314486	0.767611	0.735503	0.396922	11.0131	1.314	0.072595	0.100135	0.1154	6.41946	12.9931	0.078374
93	2013	0	Inner Mongoria	0	0	1	1	0	0.6364	1.7411	4.2581	0.130544	0.480604	0.713617	0.263376	0.327618	11.0927	0.52	0.052213	0.08267	0.0277	3.68156	2.97872	0.078132
93	2014	0	Inner Mongoria	0	0	1	1	0	0.67964	1.85938	4.2581	0.129312	0.488824	0.755065	0.713727	0.348269	11.0821	0.52	0.044151	0.093837	0.0271	3.78021	2.95306	0.074337
93	2015	0	Inner Mongoria	0	0	1	1	0	0.72778	1.98742	4.2581	0.126436	0.515405	0.868328	0.737864	0.401982	11.3762	0.59	0.041708	0.092327	0.0204	4.07641	2.83272	0.066239
93	2016	0	Inner Mongoria	0	0	1	1	0	0.776	2.12298	4.23711	0.123804	0.551261	0.941337	0.978903	0.401243	8.87347	0.63	0.036437	0.087415	0.0204	4.45267	2.62458	0.068123
93	2017	0	Inner Mongoria	0	0	1	1	0	0.82854	2.25833	4.02432	0.065426	0.573846	1.17273	1.25254	0.464403	10.2817	0.64	0.035593	0.090406	0.0547	8.77092	5.51353	0.062116
93	2018	0	Inner Mongoria	0	0	1	1	0	0.89356	2.36669	4.21286	0.054846	0.585837	1.13045	1.16823	0.469589	10.8445	0.68	0.041505	0.094942	0.0536	10.6814	6.55135	0.042523
93	2019	0	Inner Mongoria	0	0	1	1	0	0.96165	2.46393	4.19867	0.049581	0.534478	1.34183	1.06274	0.506429	11.2024	0.71	0.040728	0.097891	0.0562	10.7799	8.38915	0.043738
93	2020	1	Inner Mongoria	0	0	1	1	0	0.97331	2.55721	4.18428	0.087444	0.491357	1.46704	0.951618	0.529791	10.5872	0.75	0.040207	0.097122	0.0696	5.61912	4.8168	0.047972
94	2013	0	Inner Mongoria	0	0	1	1	0	0.7021	2.1527	4.04452	0.49959	0.343563	0.438036	0.365607	0.294425	13.4896	0.098	0.024657	0.026086	0.035	0.687692	0.313952	0.146429
94	2014	0	Inner Mongoria	0	0	1	1	0	0.7755	2.18537	4.04452	0.506588	0.344256	0.477642	0.417963	0.288804	13.6178	0.0986	0.016679	0.025617	0.032	0.679558	0.294431	0.141632
94	2015	0	Inner Mongoria	0	0	1	1	0	0.83016	2.33895	4.04452	0.474422	0.384577	0.562641	0.433638	0.304963	13.5334	0.1	0.015629	0.026049	0.032	0.810623	0.297207	0.145087
94	2016	0	Inner Mongoria	0	0	1	1	0	0.88391	2.50025	4.01357	0.476406	0.390804	0.60782	0.419077	0.267195	13.535	0.1006	0.015132	0.028585	0.032	0.820317	0.278734	0.177147
94	2017	0	Inner Mongoria	0	0	1	1	0	0.942	2.66537	3.57261	0.40061	0.42832	0.863049	0.677919	0.352802	13.3584	0.1013	0.014246	0.03415	0.031	1.06917	0.427025	0.113512
94	2018	0	Inner Mongoria	0	0	1	1	0	1.0102	2.81607	3.99573	0.405385	0.472673	0.885874	0.630978	0.437391	13.1438	0.102	0.013205	0.033993	0.031	1.16598	0.300805	0.102805
94	2019	0	Inner Mongoria	0	0	1	1	0	1.09751	2.93029	3.9796	0.494174	0.332936	0.991407	0.678918	0.414498	12.8702	0.103	0.013483	0.036856	0.031	0.673722	0.349857	0.0685
94	2020	1	Inner Mongoria	0	0	1	1	0	1.15912	3.07111	3.93332	0.528129	0.297411	0.958063	0.607377	0.43169	12.636	0.1049	0.012943	0.036856	0.031	0.563142	0.330336	0.080948
95	2013	0	Inner Mongoria	0	0	1	1	0	0.5786	2.0802	3.83321	0.564101	0.251339	0.451597	0.188674	0.348512	13.2343	0.13	0.027239	0.030832	0.0449	0.445556	0.327176	0.11474
95	2014	0	Inner Mongoria	0	0	1	1	0	0.64194	3.32062	3.83321	0.580305	0.253297	0.47379	0.221432	0.3797	13.3426	0.136	0.024845	0.032839	0.0445	0.43649	0.286742	0.097279
95	2015	0	Inner Mongoria	0	0	1	1	0	0.69031	2.39228	3.83321	0.586311	0.264081	0.552301	0.234475	0.360966	13.4842	0.14	0.023202	0.032917	0.0445	0.450412	0.255168	0.099396
95	2016	0	Inner Mongoria	0	0	1	1	0	0.73677	2.55392	3.80033	0.592431	0.268389	0.677574	0.285271	0.299544	13.5528	0.149	0.021906	0.039141	0.0445	0.45303	0.23493	0.116898
95	2017	0	Inner Mongoria	0	0	1	1	0	0.78486	2.7222	3.49321	0.470375	0.32939	0.919631	0.600546	0.461506	13.5863	0.15	0.0207	0.048896	0.0445	0.700272	0.425693	0.080067
95	2018	0	Inner Mongoria	0	0	1	1	0	0.84332	2.87755	3.79178	0.412091	0.299526	0.819396	0.463412	0.456079	13.6188	0.151	0.0207	0.048896	0.0445	0.726845	0.699805	0.068447
95	2019	0	Inner Mongoria	0	0	1	1	0	0.9163	2.99478	3.78439	0.492228	0.353338	0.916098	0.592429	0.408285	13.6502	0.152	0.018678	0.046238	0.0445	0.717835	0.313745	0.079164
95	2020	1	Inner Mongoria	0	0	1	1	0	0.97172	2.90526	3.75366	0.497133	0.337647	1.00044	0.637242	0.460021	13.6804	0.1543	0.018146	0.050794	0.0445	0.679188	0.332345	0.070491
96	2013	0	Inner Mongoria	0	0	1	1	0	0.6544	1.8811	4.52636	0.458587	0.296749	0.486443	0.255143	0.330592	13.545	0.236	0.051051	0.042992	0.043	0.647094	0.533515	0.081029
96	2014	0	Inner Mongoria	0	0	1	1	0	0.72147	1.99797	4.49651	0.471832	0.309404	0.52799	0.291916	0.364274	13.4342	0.24	0.04914	0.037944	0.04	0.655749	0.463648	0.068023
96	2015	0	Inner Mongoria	0	0	1	1	0	0.77079	2.13866	4.49651	0.415864	0.364634	0.654382	0.311787	0.467564	13.3697	0.25	0.045289	0.038761	0.04	0.876811	0.527823	0.06552
96	2016	0	Inner Mongoria	0	0	1	1	0	0.82217	2.28589	4.50556	0.425825	0.370128	0.76454	0.373692	0.399041	13.4028	0.265	0.042947	0.051034	0.04	0.869201	0.479179	0.082571
96	2017	0	Inner Mongoria	0	0	1	1	0	0.87525	2.43949	3.97808	0.321333	0.410763	1.15179	0.571149	0.577286	13.2857	0.27	0.040733	0.06262	0.034	1.27831	0.833729	0.056789
96	2018	0	Inner Mongoria	0	0	1	1	0	0.94046	2.58131	4.50104	0.334163	0.408613	1.29015	0.57979	0.618084	13.1531	0.26	0.039321	0.067707	0.057	1.2228	0.769756	0.051708
96	2019	0	Inner Mongoria	0	0	1	1	0	1.02341	2.68968	4.49408	0.276037	0.506091	1.16393	0.577289	0.519699	13.0002	0.25	0.037899	0.075375	0.0504	1.83342	0.789283	0.064717
96	2020	1	Inner Mongoria	0	0	1	1	0	1.06745	2.78833	4.42849	0.269384	0.484113	1.37517	0.571612	0.608848	12.9886	0.254	0.036463	0.079994	0.0828	1.79712	0.915064	0.063735
97	2013	0	Inner Mongoria	0	0	1	1	0	0.6267	1.8143	4.49651	0.468363	0.339681	0.545903	0.687665	0.334242	13.4866	0.18	0.042666	0.040055	0.0888	0.725251	0.409844	0.14426
97	2014	0	Inner Mongoria	0	0	1	1	0	0.69194	1.97897	4.46574	0.452941	0.354633	0.642431	0.819975	0.420644	15.4077	0.19	0.043038	0.03763	0.061	0.782957	0.424838	0.12309
97	2015	0	Inner Mongoria	0	0	1	1	0	0.74033	2.11939	4.46574	0.413121	0.409749	0.68643	0.782671	0.397225	15.3373	0.2	0.034589	0.049804	1.2218	0.991836	0.428762	0.131183
97	2016	0	Inner Mongoria	0	0	1	1	0	0.78889	2.26137	4.46574	0.420702	0.410048	0.771564	0.724515	0.41775	15.5794	0.21	0.041282	0.05063	1.5284	0.974676	0.402305	0.128674
97	2017	0	Inner Mongoria	0	0	1	1	0	0.84537	2.40763	4.09104	0.310359	0.460177	1.29699	1.09571	0.498498	15.2135	0.1253	0.039245	0.063247	0.029	1.48272	0.739347	0.064249
97	2018	0	Inner Mongoria	0	0	1	1	0	0.90219	2.5462	4.46386	0.293261	0.4657	1.3894	0.956204	0.539556	14.6304	0.22	0.031716	0.075247	0.0305	1.58801	0.821926	0.058071
97	2019	0	Inner Mongoria	0	0	1	1	0	0.9806	2.6553	4.45758	0.220976	0.567151	1.40381	0.855234	0.484895	13.0624	0.23	0.031937	0.075247	0.0317	2.56658	0.95881	0.058958
97	2020	1	Inner Mongoria	0	0	1	1	0	1.03151	2.76466	4.43753	0.250732	0.534085	1.51912	0.902907	0.510962	12.4284	0.2346	0.037059	0.076073	0.0412	2.1301	0.858217	0.056184
98	2013	0	Inner Mongoria	0	0	1	1	0	0.716	2.0307	4.09104	0.620692	0.222039	0.26108	0.20307	0.212198	14.3787	0.21	0.026406	0.031157	0.0618	0.357729	0.253375	0.142041
98	2014	0	Inner Mongoria	0	0	1	1	0	0.79283	2.12946	4.09104	0.593002	0.249029	0.349259	0.26651	0.247113	13.9097	0.23	0.017264	0.032071	0.068	0.419947	0.266389	0.14368
98	2015	0	Inner Mongoria	0	0	1	1	0	0.85089	2.27404	4.09104	0.564945	0.283285	0.418992	0.305875	0.259889	13.9112	0.26	0.015574	0.029047	0.0672	0.501437	0.268646	0.163873
98	2016	0	Inner Mongoria	0	0	1	1	0	0.90785	2.42774	4.07547	0.574111	0.285323	0.464489	0.359692	0.231915	14.0756	0.22	0.013975	0.029649	0.035	0.496983	0.244841	0.193047
98	2017	0	Inner Mongoria	0	0	1	1	0	0.96782	2.58945	3.52493	0.485778	0.323777	0.701758	0.618489	0.338248	14.1574	0.18	0.013123	0.046868	0.035	0.666512	0.392041	0.129634
98	2018	0	Inner Mongoria	0	0	1	1	0	1.03917	2.73351	4.07038	0.508234	0.310955	0.717239	0.649393	0.306266	14.2331	0.19	0.01642	0.046042	0.035	0.611835	0.355763	0.180759
98	2019	0	Inner Mongoria	0	0	1	1	0	1.12708	2.84422	4.05447	0.453728	0.377597	0.778131	0.724437	0.354356	14.3034	0.18	0.016707	0.046514	0.035	0.832209	0.371754	0.180689
98	2020	1	Inner Mongoria	0	0	1	1	0	1.24046	2.95904	3.98518	0.443503	0.373325	0.869251	0.769567	0.381613	14.3573	0.1846	0.016498	0.04514	0.0259	0.841764	0.413013	0.174985
99	2013	0	Inner Mongoria	0	0	1	1	0	0.5676	1.9095	4.09104	0.379884	0.322795	0.363373	0.495543	0.347634	12.81	0.23	0.025848	0.028677	0.0883	0.849721	0.782667	0.084887
99	2014	0	Inner Mongoria	0	0	1	1	0	0.63023	2.01795	4.13549	0.402383	0.319897	0.449226	0.474299	0.363986	12.9626	0.3	0.022717	0.032353	0.0728	0.795006	0.690182	0.072375
99	2015	0	Inner Mongoria	0	0	1	1	0	0.67834	2.26129	4.13549	0.446435	0.319341	0.456797	0.408773	0.35559	12.9315	0.31	0.019136	0.034279	0.0758	0.715313	0.524654	0.071303
99	2016	0	Inner Mongoria	0	0	1	1	0	0.72205	2.41197	4.01847	0.454949	0.3234	0.510924	0.521851	0.322447	12.8171	0.31	0.017221	0.033729	0.0758	0.710848	0.487198	0.084972
99	2017	0	Inner Mongoria	0	0	1	1	0	0.76907	2.57158	3.65324	0.345982	0.357143	0.726897	0.814248	0.440214	12.6894	0.32	0.015318	0.029007	0.068	1.03226	0.858065	0.074147
99	2018	0	Inner Mongoria	0	0	1	1	0	0.82521	2.71866	4.00667	0.35	0.393182	0.859227	0.846145	0.541273	12.543	0.34	0.013446	0.032443	0.0616	1.12338	0.733766	0.051579
99	2019	0	Inner Mongoria	0	0	1	1	0	0.89807	2.82681	3.99223	0.360516	0.358745	0.785915	0.803516	0.487342	12.3715	0.36	0.014314	0.034991	0.0219	0.995088	0.778712	0.048591
99	2020	1	Inner Mongoria	0	0	1	1	0	0.93613	2.9541	4.0311	0.388304	0.32294	0.889538	0.783182	0.48662	12.2141	0.37	0.013139	0.034979	0.0219	0.831669	0.743634	0.048192
100	2013	0	Inner Mongoria	0	0	1	1	0	0.7282	1.9275	4.09104	0.642411	0.206496	0.282935	0.14463	0.223464	14.2076	0.16	0.025026	0.037932	0.2893	0.321439	0.235197	0.152794
100	2014	0	Inner Mongoria	0	0	1	1	0	0.80277	2.1394	4.13549	0.645781	0.210621	0.342086	0.233101	0.26076	14.2666	0.18	0.017049	0.035083	0.6781	0.32615	0.222364	0.13189
100	2015	0	Inner Mongoria	0	0	1	1	0	0.8577	2.28251	4.13549	0.575875	0.273373	0.363651	0.24886	0.2785	14.3164	0.17	0.017721	0.035602	0.6783	0.47471	0.261781	0.136114
100	2016	0	Inner Mongoria	0	0	1	1	0	0.91266	2.43822	4.04166	0.582223	0.276624	0.500365	0.321483	0.258496	14.2583	0.18	0.020711	0.034628	0.056	0.475116	0.242438	0.138535
100	2017	0	Inner Mongoria	0	0	1	1	0	0.97406	2.6025	3.73955	0.438325	0.351999	0.836603	0.611395	0.409925	14.0537	0.18	0.016493	0.041748	0.0104	0.803055	0.478355	0.079186
100	2018	0	Inner Mongoria	0	0	1	1	0	1.04623	2.75664	4.02917	0.41547	0.315885	0.783198	0.53452	0.375852	13.7961	0.19	0.015889	0.042054	0.04	0.760309	0.646606	0.084323
100	2019	1	Inner Mongoria	0	0	1	1	0	1.13633	2.86943	4.01896	0.457816	0.324194	0.770871	0.556214	0.340023	13.4484	0.1945	0.019281	0.042054	0.04	0.708132	0.476151	0.099211
100	2020	1	Inner Mongoria	0	0	1	1	0	1.21484	3.00046	4.03927	0.457227	0.309768	0.84599	0.622405	0.388716	13.167	0.2	0.019337	0.046442	0.04	0.677492	0.509604	0.099621
101	2013	0	Inner Mongoria	0	0	1	1	0	0.6924	1.9401	4.09104	0.354135	0.340495	0.429401	0.368849	0.43199	13.1286	0.35	0.037873	0.050081	0.0485	0.961484	0.862296	0.077119
101	2014	0	Inner Mongoria	0	0	1	1	0	0.76832	2.08714	4.09104	0.363322	0.346471	0.488703	0.487688	0.474795	13.2862	0.35	0.036433	0.039482	0.049	0.953619	0.798762	0.066313
101	2015	0	Inner Mongoria	0	0	1	1	0	0.82637	2.23092	4.09104	0.329416	0.397549	0.57252	0.603161	0.461385	13.4445	0.39	0.036079	0.040239	0.0521	1.20683	0.82884	0.071285
101	2016	0	Inner Mongoria	0	0	1	1	0	0.88083	2.38148	4.05918	0.334218	0.404574	0.592229	0.583359	0.434658	13.5482	0.41	0.034885	0.052346	0.0521	1.21051	0.781551	0.087128
101	2017	0	Inner Mongoria	0	0	1	1	0	0.93955	2.53707	3.71734	0.357579	0.358042	0.729452	0.783703	0.502496	13.2871	0.4	0.031775	0.055639	0.0422	1.00129	0.795288	0.035739
101	2018	0	Inner Mongoria	0	0	1	1	0	1.00992	2.68634	4.05589	0.375247	0.413535	0.900915	0.995291	0.591017	12.9329	0.41	0.028523	0.057012	0.0422	1.10203	0.56288	0.036877
101	2019	0	Inner Mongoria	0	0	1	1	0	1.09678	2.79597	4.04975	0.321909	0.413752	0.815641	0.737977	0.519722	12.3794	0.43	0.027156	0.061947	0.0068	1.28531	0.821162	0.039073
101	2020	1	Inner Mongoria	0	0	1	1	0	1.16239	2.9178	4.03399	0.317483	0.384989	0.944555	0.781416	0.511057	11.8379	0.44	0.027183	0.059349	0.0076	1.21263	0.937144	0.048065
102	2013	0	Inner Mongoria	0	0	1	1	0	0.6397	1.8508	2.60944	0.246463	0.573104	0.681574	0.73519	0.782871	8.78263	0.05	0.004299	0.017437	0.006	2.32532	0.732094	0.120767
102	2014	0	Inner Mongoria	0	0	1	1	0	0.71655	2.00387	2.60944	0.246891	0.58206	0.838072	0.858076	0.984163	9.58658	0.05	0.003771	0.017647	0.006	2.35756	0.69281	0.060226
102	2015	0	Inner Mongoria	0	0	1	1	0	0.76943	2.15774	2.60944	0.238293	0.599557	0.892757	0.892727	0.839112	9.15197	0.06	0.003391	0.016231	0.006	2.51605	0.680463	0.071942
102	2016	0	Inner Mongoria	0	0	1	1	0	0.82111	2.30705	2.52606	0.241529	0.602422	0.970121	1.75335	0.643254	8.78447	0.06	0.003267	0.017158	0.006	2.4942	0.646088	0.099596
102	2017	0	Inner Mongoria	0	0	1	1	0	0.87695	2.46332	2.9125	0.195413	0.621039	1.03067	2.48445	0.764074	8.54169	0.04	0.003161	0.023456	0.006	3.17808	0.939279	0.097957
102	2018	0	Inner Mongoria	0	0	1	1	0	0.96989	2.59849	2.51072	0.184361	0.616552	0.999503	2.43216	0.882073	8.2204	0.04	0.002811	0.022984	0.006	3.34426	1.07988	0.081027
102	2019	1	Inner Mongoria	0	0	1	1	0	1.05525	2.71797	2.4884	0.133325	0.674663	0.941649	2.14888	0.888294	7.74414	0.05	0.002757	0.024696	0.006	5.06027	1.44017	0.07323
102	2020	1	Inner Mongoria	0	0	1	1	0	1.12114	2.83841	2.639	0.133874	0.647059	1.06906	1.9603	0.716095	7.6367	0.053	0.001854	0.02375	0.006	4.83333	1.63636	0.131602
103	2013	0	Inner Mongoria	0	0	1	1	0	0.636	1.7558	4.52636	0.322835	0.279298	0.18337	0.33583	0.33526	13.356	0.95	0.091201	0.112564	0.0361	0.865141	1.23241	0.083145
103	2014	0	Inner Mongoria	0	0	1	1	0	0.71359	1.89412	4.52636	0.347541	0.269752	0.127244	0.314815	0.307201	13.4131	0.97	0.093916	0.113035	0.037	0.776173	1.10118	0.092428
103	2015	0	Inner Mongoria	0	0	1	1	0	0.767	2.03579	4.49651	0.36335	0.277497	0.226333	0.422348	0.360034	13.6252	1.01	0.069447	0.111763	0.073	0.76372	0.98845	0.083608
103	2016	0	Inner Mongoria	0	0	1	1	0	0.81967	2.1827	4.50496	0.372796	0.280565	0.249879	0.403154	0.306101	13.7898	1.05	0.071487	0.11144	0.0801	0.752596	0.929838	0.104077
103	2017	0	Inner Mongoria	0	0	1	1	0	0.8727	2.3284	4.52636	0.204669	0.313956	0.424176	0.593813	0.492327	13.4617	0.96	0.071809	0.125559	0.083	1.53397	2.35197	0.078015
103	2018	0	Inner Mongoria	0	0	1	1	0	0.96859	2.46077	4.50405	0.183829	0.303265	0.430881	0.575765	0.51147	12.9701	1.01	0.07389	0.125829	0.0669	1.64971	2.79012	0.070947
103	2019	0	Inner Mongoria	0	0	1	1	0	1.0576	2.58347	4.50255	0.15987	0.351913	0.434616	0.565622	0.455823	11.9626	1.05	0.07542	0.127291	0.112	2.20125	3.05384	0.072738
103	2020	1	Inner Mongoria	0	0	1	1	0	1.09509	2.69684	4.50915	0.189831	0.317378	0.517125	0.696123	0.434511	10.8452	1.11	0.076879	0.126495	0.1083	1.6719	2.59595	0.076839
104	2013	0	Inner Mongoria	0	0	1	1	0	0.5917	1.6849	4.2581	0.340011	0.339974	0.28803	0.320652	0.414089	12.6496	0.56	0.071716	0.115271	0.0496	0.999892	0.941188	0.075198
104	2014	0	Inner Mongoria	0	0	1	1	0	0.66448	1.81597	4.2581	0.357244	0.332042	0.295707	0.367301	0.381613	12.916	0.61	0.071322	0.120508	0.0656	0.929456	0.869753	0.081611
104	2015	0	Inner Mongoria	0	0	1	1	0	0.71289	1.9482	4.21888	0.378561	0.334427	0.324999	0.377276	0.438517	13.0692	0.66	0.072126	0.126032	0.067	0.883417	0.758165	0.073986
104	2016	0	Inner Mongoria	0	0	1	1	0	0.76014	2.08691	4.24064	0.385075	0.337578	0.339399	0.429474	0.430941	13.3013	0.71	0.07149	0.129611	0.067	0.876655	0.72024	0.08168
104	2017	0	Inner Mongoria	0	0	1	1	0	0.81238	2.2243	4.21406	0.238408	0.376783	0.545428	0.642913	0.615758	13.0233	0.71	0.06957	0.129014	0.041	1.58041	1.61408	0.051016
104	2018	0	Inner Mongoria	0	0	1	1	0	0.9008	2.34858	4.22922	0.219286	0.366023	0.521855	0.599464	0.553121	12.6368	0.76	0.068592	0.138336	0.0385	1.66916	1.89109	0.082562
104	2019	1	Inner Mongoria	0	0	1	1	0	0.98269	2.46339	4.22605	0.200869	0.397651	0.520687	0.635991	0.486806	11.9986	0.81	0.06706	0.140601	0.051	1.97965	1.99871	0.065065
104	2020	1	Inner Mongoria	0	0	1	1	0	1.04431	2.58	4.23159	0.198137	0.386374	0.630368	0.681904	0.505539	11.7416	0.87	0.064991	0.142477	0.1001	1.95004	2.09699	0.1115
105	2013	0	Inner Mongoria	0	0	1	1	0	0.628	1.7545	4.68888	0.289913	0.280307	0.348145	0.465771	0.332208	13.07	1.53	0.083436	0.076359	0.053	0.966865	1.48244	0.04851
105	2014	0	Inner Mongoria	0	0	1	1	0	0.70592	1.89442	4.68888	0.299265	0.278066	0.344965	0.717277	0.363001	13.3127	1.47	0.084429	0.127634	0.069	0.929161	1.41236	0.051196
105	2015	0	Inner Mongoria	0	0	1	1	0	0.75941	2.03608	4.66356	0.303891	0.291496	0.41699	0.731888	0.384801	13.4604	1.51	0.08699	0.125149	0.067	0.959213	1.33144	0.06936
105	2016	0	Inner Mongoria	0	0	1	1	0	0.81236	2.18703	4.66587	0.310702	0.298688	0.448553	0.768195	0.411783	13.5903	1.58	0.089496	0.130628	0.069	0.961333	1.25719	0.093616
105	2017	0	Inner Mongoria	0	0	1	1	0	0.8658	2.34173	4.66382	0.178068	0.339703	0.685071	0.930569	0.54864	13.2538	1.58	0.091739	0.108148	0.08	1.90771	2.70811	0.138927
105	2018	0	Inner Mongoria	0	0	1	1	0	0.96181	2.4772	4.66099	0.155281	0.329943	0.684686	0.830361	0.500274	12.7431	1.59	0.095676	0.124024	0.0787	2.12482	3.31513	0.165567
105	2019	1	Inner Mongoria	0	0	1	1	0	1.05107	2.59354	4.65325	0.092477	0.392567	0.796249	0.81564	0.507252	11.6449	1.593	0.097998	0.127863	0.0512	4.24504	5.5685	0.289484
105	2020	1	Inner Mongoria	0	0	1	1	0	1.08529	2.71388	4.65455	0.086601	0.375207	0.92287	0.882284	0.487064	11.2859	1.6	0.098368	0.123804	0.069	4.33258	6.21461	0.272265
106	2013	0	Inner Mongoria	0	0	1	1	0	0.6119	1.7108	4.43399	0.41416	0.225581	0.405521	0.384476	0.341383	13.0498	0.52	0.07266	0.073036	0.0639	0.54467	0.869854	0.0356
106	2014	0	Inner Mongoria	0	0	1	1	0	0.68663	1.84383	4.43399	0.421211	0.237217	0.408984	0.459152	0.300249	13.2262	0.55	0.063964	0.071864	0.068	0.563178	0.810929	0.046433
106	2015	0	Inner Mongoria	0	0	1	1	0	0.73595	1.98363	4.46574	0.440474	0.240958	0.425055	0.473333	0.38694	13.3128	0.57	0.06378	0.074938	0.0917	0.547042	0.723239	0.048018
106	2016	0	Inner Mongoria	0	0	1	1	0	0.78793	2.12875	4.41346	0.446501	0.246295	0.736583	0.510397	0.326309	13.503	0.62	0.064205	0.086054	0.1223	0.551611	0.688023	0.066209
106	2017	0	Inner Mongoria	0	0	1	1	0	0.83838	2.27516	4.28766	0.262915	0.316743	0.736937	0.834342	0.47763	13.2041	0.54	0.063857	0.088321	0.1058	1.20473	1.59878	0.095318
106	2018	0	Inner Mongoria	0	0	1	1	0	0.92885	2.40895	4.39986	0.252929	0.300961	0.718152	0.721774	0.506817	12.7757	0.46	0.06402	0.096431	0.1058	1.1899	1.76378	0.080606
106	2019	0	Inner Mongoria	0	0	1	1	0	1.01235	2.52443	4.39652	0.184686	0.345155	0.845839	0.705372	0.475927	12.0103	0.4726	0.064773	0.096413	0.092	1.86887	2.54571	0.09361
106	2020	1	Inner Mongoria	0	0	1	1	0	1.06718	2.64111	4.41082	0.233355	0.307346	0.899395	0.68731	0.445096	11.5303	0.474	0.062155	0.098304	0.0968	1.31707	1.96824	0.102328
107	2013	0	Inner Mongoria	0	0	1	1	0	0.691	2.4713	2.94591	0.672483	0.236039	0.359774	0.279642	0.224232	13.2288	0.057	0.014272	0.020033	0.0128	0.350996	0.136031	0.22945
107	2014	0	Inner Mongoria	0	0	1	1	0	0.76172	2.67563	2.94591	0.670824	0.239152	0.365387	0.299036	0.256774	13.4024	0.0465	0.013363	0.02023	0.0128	0.356504	0.1342	0.19527
107	2015	0	Inner Mongoria	0	0	1	1	0	0.818	2.86255	2.94591	0.669347	0.244906	0.355133	0.356362	0.23233	13.5749	0.048	0.012468	0.020912	0.0128	0.365889	0.128106	0.214044
107	2016	0	Inner Mongoria	0	0	1	1	0	0.87218	3.07199	2.91839	0.659813	0.252871	0.371944	0.322504	0.220292	13.7534	0.05	0.011908	0.021542	0.0122	0.383246	0.132338	0.233369
107	2017	0	Inner Mongoria	0	0	1	1	0	1.00365	3.286	2.91692	0.550458	0.325122	0.560834	0.350563	0.298256	13.5325	0.0395	0.011051	0.029466	0.0122	0.590639	0.226029	0.176482
107	2018	0	Inner Mongoria	0	0	1	1	0	1.08431	3.46632	2.90211	0.501588	0.370921	0.629727	0.359936	0.323754	13.2487	0.04	0.010868	0.029309	0.0147	0.739494	0.254176	0.141947
107	2019	1	Inner Mongoria	0	0	1	1	0	1.17442	3.56471	2.89762	0.429865	0.414513	0.752226	0.391637	0.402961	12.8509	0.0447	0.011308	0.029034	0.0156	0.964288	0.362025	0.128549
107	2020	1	Inner Mongoria	0	0	1	1	0	1.33345	3.67703	2.89912	0.345865	0.463763	0.941412	0.682886	0.436194	12.4838	0.0449	0.01157	0.028994	0.0156	1.34088	0.550425	0.111876
108	2013	0	Inner Mongoria	0	0	1	1	0	0.7494	2.3619	4.04452	0.401897	0.329727	0.604071	0.419917	0.300908	12.2474	0.23	0.029851	0.028817	0.0466	0.820427	0.667772	0.074895
108	2014	0	Inner Mongoria	0	0	1	1	0	0.82757	2.54089	4.04452	0.405193	0.323594	0.625167	0.468657	0.372093	12.4574	0.24	0.029318	0.030801	0.0472	0.798618	0.669343	0.06119
108	2015	0	Inner Mongoria	0	0	1	1	0	0.88291	2.73603	4.04452	0.407053	0.336144	0.562328	0.489359	0.310106	12.6733	0.27	0.027811	0.030998	0.0543	0.825799	0.630883	0.076469
108	2016	0	Inner Mongoria	0	0	1	1	0	0.93969	2.92533	4.04452	0.38772	0.364115	0.752156	0.568493	0.342037	12.7404	0.28	0.028234	0.036429	0.0543	0.939118	0.64006	0.076563
108	2017	0	Inner Mongoria	0	0	1	1	0	1.00422	3.12337	3.40694	0.252543	0.445091	1.05099	0.913993	0.403293	12.5399	0.248	0.026037	0.031486	0.0543	1.76243	1.19728	0.08234
108	2018	0	Inner Mongoria	0	0	1	1	0	1.08393	3.28551	4.03687	0.232661	0.469069	1.15721	0.938517	0.50707	12.5623	0.249	0.025477	0.031486	0.0543	2.0161	1.28199	0.079701
108	2019	0	Inner Mongoria	0	0	1	1	0	1.17506	3.40771	4.02383	0.229562	0.460391	1.24952	1.03298	0.567994	12.5598	0.25	0.025252	0.03144	0.03	2.00552	1.3506	0.074451
108	2020	1	Inner Mongoria	0	0	1	1	0	1.25715	3.54315	3.99423	0.230589	0.453277	1.13783	0.96195	0.520742	12.5601	0.2546	0.024632	0.032455	0.0462	1.96574	1.37099	0.099014
109	2013	0	Inner Mongoria	0	0	1	1	0	0.676	2.2474	2.94591	0.517834	0.310301	0.33646	0.333001	0.34173	11.8064	0.11	0.007935	0.015481	0.024	0.599229	0.331894	0.114366
109	2014	0	Inner Mongoria	0	0	1	1	0	0.74785	2.46638	2.94591	0.51537	0.315778	0.36842	0.369664	0.338731	12.0529	0.11	0.007537	0.015841	0.0293	0.612721	0.327634	0.120984
109	2015	0	Inner Mongoria	0	0	1	1	0	0.80233	2.66313	2.94591	0.502245	0.339333	0.364063	0.399763	0.341215	12.1971	0.116	0.006758	0.016195	0.0293	0.675632	0.31543	0.115594
109	2016	0	Inner Mongoria	0	0	1	1	0	0.85708	2.8632	2.97824	0.491945	0.352859	0.391936	0.363125	0.32944	12.3567	0.1185	0.008272	0.015179	0.0275	0.717273	0.315476	0.121441
109	2017	0	Inner Mongoria	0	0	1	1	0	0.95969	3.05984	2.65823	0.414668	0.386308	0.525282	0.369647	0.407006	12.1509	0.119	0.007479	0.018836	0.0275	0.931608	0.479961	0.097732
109	2018	0	Inner Mongoria	0	0	1	1	0	1.03871	3.24576	2.96291	0.350251	0.44054	0.604927	0.398788	0.476179	11.8914	0.12	0.007107	0.018836	0.0275	1.25779	0.597312	0.094798
109	2019	0	Inner Mongoria	0	0	1	1	0	1.12807	3.40762	2.95727	0.283564	0.486981	0.643988	0.450686	0.591784	11.5401	0.13	0.006884	0.020965	0.0275	1.71736	0.80918	0.08179
109	2020	1	Inner Mongoria	0	0	1	1	0	1.19718	3.57733	2.92425	0.358746	0.422183	0.630992	0.507403	0.489006	11.3309	0.1345	0.00597	0.021756	0.042	1.17683	0.610654	0.09225
110	2013	0	Jilin	0	1	0	0	1	0.5474	1.56	3.61007	0.586736	0.30994	0.368086	0.300454	0.23178	14.1	0.106	0.029603	0.051197	0.0373	0.528245	0.1761	0.283198
110	2014	0	Jilin	0	1	0	0	1	0.61206	1.58824	3.6174	0.578078	0.315419	0.421949	0.428383	0.233784	14.3273	0.107	0.028579	0.050658	0.0245	0.545633	0.184237	0.285576
110	2015	0	Jilin	0	1	0	0	1	0.66202	1.72256	3.62467	0.567171	0.325218	0.476958	0.453511	0.249713	14.4634	0.108	0.028844	0.052184	0.0241	0.573404	0.189733	0.259112
110	2016	0	Jilin	0	1	0	0	1	0.78112	1.898	3.62684	0.528722	0.371108	0.498503	0.801407	0.310797	14.5158	0.1086	0.028761	0.049927	0.0273	0.701895	0.189457	0.215637
110	2017	0	Jilin	0	1	0	0	1	0.85446	1.99876	3.61007	0.437761	0.465252	0.632665	0.740595	0.384261	14.5789	0.09	0.028427	0.048334	0.0287	1.0628	0.22155	0.124711
110	2018	0	Jilin	0	1	0	0	1	0.93978	2.04757	3.60269	0.460571	0.44402	0.619332	0.752842	0.371477	14.6347	0.0689	0.028614	0.046937	0.0289	0.964064	0.207156	0.21379
110	2019	0	Jilin	0	1	0	0	1	1.03291	2.12694	3.59376	0.29602	0.602125	0.699575	0.808862	0.384348	14.6841	0.068	0.029892	0.052096	0.0201	2.03407	0.344083	0.195048
110	2020	1	Jilin	0	1	0	0	1	1.13947	2.12203	3.59675	0.246693	0.635536	0.793916	0.92385	0.378706	14.7277	0.069	0.027931	0.051865	0.0394	2.57622	0.477402	0.175385
111	2013	0	Jilin	0	1	0	0	1	0.5769	1.74	4.3673	0.47204	0.319794	0.308363	0.68103	0.181416	13.6336	0.87	0.07164	0.07338	0.1464	0.677473	0.440993	0.243584
111	2014	0	Jilin	0	1	0	0	1	0.63804	1.68627	4.3322	0.457681	0.3373	0.340185	0.727716	0.204521	13.7063	0.94	0.067202	0.072672	0.1464	0.736975	0.447951	0.236255
111	2015	0	Jilin	0	1	0	0	1	0.69645	1.8002	4.29584	0.454586	0.33737	0.366136	0.955778	0.209882	13.6695	0.98	0.065496	0.077589	0.1864	0.742148	0.457654	0.238648
111	2016	0	Jilin	0	1	0	0	1	0.76138	1.91698	4.30322	0.434497	0.368581	0.390282	0.995961	0.267172	13.7876	1.04	0.06427	0.083124	0.1864	0.848293	0.45322	0.198529
111	2017	0	Jilin	0	1	0	0	1	0.82905	2.01717	4.28466	0.331056	0.431695	0.521133	1.22872	0.357876	13.8663	1.08	0.062751	0.084579	0.1864	1.30399	0.716646	0.140623
111	2018	0	Jilin	0	1	0	0	1	0.89879	2.07429	4.27563	0.337517	0.408514	0.603237	1.08986	0.33526	13.9415	1.1087	0.0629	0.084671	0.1919	1.21035	0.752463	0.227822
111	2019	1	Jilin	0	1	0	0	1	0.99533	2.18549	4.26881	0.098564	0.502907	1.02523	1.52604	0.467457	14.0135	1.122	0.058434	0.083715	0.1919	5.10233	4.04334	0.231048
111	2020	1	Jilin	0	1	0	0	1	1.08493	2.18778	4.27185	0.105288	0.474906	1.21633	1.31019	0.520552	14.0823	1.16	0.056991	0.081547	0.2035	4.51056	3.98723	0.161387
112	2013	0	Jilin	0	1	0	0	1	0.5823	1.59	4.61092	0.383372	0.424733	0.280163	0.288468	0.247249	13.399	1.05	0.088592	0.100571	0.09	1.10789	0.500544	0.213859
112	2014	0	Jilin	0	1	0	0	1	0.65059	1.59804	4.61092	0.35519	0.45821	0.327696	0.337034	0.260725	13.5065	1.16	0.085572	0.10065	0.1186	1.29004	0.525355	0.235431
112	2015	0	Jilin	0	1	0	0	1	0.70233	1.74184	4.61092	0.350912	0.465862	0.341025	0.44339	0.30086	13.6218	1.2	0.087004	0.104187	0.1186	1.32758	0.522141	0.140134
112	2016	0	Jilin	0	1	0	0	1	0.7722	1.88604	4.58712	0.343761	0.496204	0.368045	0.502743	0.29116	13.7325	1.23	0.085953	0.110953	0.1186	1.44346	0.465543	0.184669
112	2017	0	Jilin	0	1	0	0	1	0.83559	1.98409	4.57711	0.234508	0.590889	0.516407	0.800294	0.484758	13.8504	1.25	0.088129	0.117719	0.1186	2.51969	0.744548	0.158102
112	2018	0	Jilin	0	1	0	0	1	0.91407	2.05004	4.57403	0.221361	0.58149	1.31532	0.897021	0.566998	13.9636	1.2884	0.088797	0.124484	0.1186	2.62688	0.89062	0.11719
112	2019	0	Jilin	0	1	0	0	1	1.00723	2.17279	4.56275	0.135046	0.586978	1.10723	1.1837	0.67113	14.0721	1.356	0.087524	0.13125	0.1186	4.3465	2.05837	0.143247
112	2020	1	Jilin	0	1	0	0	1	1.10828	2.21096	4.56303	0.152156	0.536828	1.25673	1.0814	0.735816	14.1762	1.42	0.084575	0.138016	0.1186	3.52813	2.04405	0.125551
113	2013	0	Jilin	0	1	0	0	1	0.534	1.72	4.68888	0.572623	0.285327	0.42925	0.525098	0.229872	14.0438	0.6	0.068276	0.128523	0.1132	0.498281	0.248068	0.28299
113	2014	0	Jilin	0	1	0	0	1	0.56765	1.66667	4.71357	0.570935	0.288554	0.475676	0.620214	0.237592	14.2811	0.66	0.062415	0.134108	0.1132	0.505405	0.246108	0.481431
113	2015	0	Jilin	0	1	0	0	1	0.60154	1.77464	4.71357	0.565366	0.293065	0.523601	0.814869	0.255629	14.2994	0.67	0.059258	0.136601	0.1134	0.518363	0.250402	0.194204
113	2016	0	Jilin	0	1	0	0	1	0.77021	1.898	4.66151	0.547276	0.322978	0.573829	0.955539	0.290824	14.4073	0.72	0.059157	0.131715	0.1132	0.590155	0.237076	0.261451
113	2017	0	Jilin	0	1	0	0	1	0.83409	1.99661	4.65014	0.474477	0.376682	0.756584	1.21159	0.363263	14.62	0.74	0.055752	0.135853	0.1132	0.79389	0.313695	0.241006
113	2018	0	Jilin	0	1	0	0	1	0.89695	2.04729	4.64284	0.429304	0.402162	0.81663	1.17501	0.362326	14.8282	0.8162	0.049913	0.141985	0.1132	0.936775	0.392575	0.292917
113	2019	0	Jilin	0	1	0	0	1	0.87672	0.988398	4.63337	0.224983	0.545116	1.26151	1.53413	0.567412	15.0321	0.85	0.050951	0.150469	0.1135	2.42292	1.02186	0.244393
113	2020	1	Jilin	0	1	0	0	1	0.94679	1.56354	4.63257	0.192715	0.544303	1.52052	1.4326	0.570088	15.2317	0.9	0.047492	0.159731	0.0966	2.82439	1.36461	0.23822
114	2013	0	Jilin	0	1	0	0	1	0.568	1.59	3.83321	0.405011	0.471968	1.25261	0.614329	0.458517	13.104	0.15	0.019952	0.044487	0.0867	1.16532	0.30375	0.179022
114	2014	0	Jilin	0	1	0	0	1	0.65961	1.60784	3.83321	0.399562	0.471837	1.44406	0.607119	0.462403	13.2235	0.16	0.018371	0.050287	0.1027	1.18089	0.321854	0.188878
114	2015	0	Jilin	0	1	0	0	1	0.71188	1.7457	3.83321	0.387324	0.487263	1.50156	0.628637	0.508421	13.2419	0.17	0.017358	0.050877	0.104	1.25802	0.323796	0.166109
114	2016	0	Jilin	0	1	0	0	1	0.77144	1.88851	3.77571	0.346079	0.540626	1.64125	0.681366	0.589509	13.3417	0.16	0.016796	0.049294	0.1206	1.56215	0.327367	0.124363
114	2017	0	Jilin	0	1	0	0	1	0.82101	1.98634	3.75239	0.348109	0.575229	1.8043	0.646926	0.622385	13.4565	0.17	0.016147	0.044595	0.1834	1.65244	0.220222	0.095442
114	2018	0	Jilin	0	1	0	0	1	0.89256	2.07767	3.73437	0.145611	0.736653	2.74912	1.03273	0.960756	13.4564	0.1973	0.015743	0.041339	0.1397	5.05906	0.80857	0.071858
114	2019	1	Jilin	0	1	0	0	1	0.98644	2.1727	3.71536	0.248146	0.636111	2.90714	0.857791	0.982325	13.4564	0.205	0.015198	0.039573	0.1547	2.56345	0.466429	0.074706
114	2020	1	Jilin	0	1	0	0	1	1.04244	2.17907	3.69463	0.261011	0.598881	3.14662	0.858475	1.07565	13.4564	0.204	0.014845	0.039652	0.1499	2.29447	0.536794	0.079238
115	2013	0	Jilin	0	1	0	0	1	0.5657	1.63	3.94444	0.633694	0.254261	0.745115	0.621651	0.358214	13.7093	0.14	0.025385	0.062382	0.059	0.401237	0.176812	0.212272
115	2014	0	Jilin	0	1	0	0	1	0.67167	1.61765	3.89037	0.573386	0.305508	0.865931	0.774226	0.37406	13.6293	0.16	0.022812	0.06221	0.065	0.532814	0.211212	0.295532
115	2015	0	Jilin	0	1	0	0	1	0.69577	1.7457	3.89037	0.604448	0.281811	0.854445	0.768562	0.404336	13.6766	0.18	0.016643	0.067594	0.0625	0.466228	0.188174	0.21046
115	2016	0	Jilin	0	1	0	0	1	0.76679	0.768689	3.86619	0.572859	0.324612	0.929041	0.857211	0.563511	13.7694	0.19	0.01551	0.057602	0.1361	0.566653	0.178979	0.148362
115	2017	0	Jilin	0	1	0	0	1	0.8312	0.75972	3.84141	0.587566	0.339338	1.07262	1.03251	0.622531	13.8202	0.2	0.014963	0.063807	0.1302	0.577532	0.124405	0.126401
115	2018	0	Jilin	0	1	0	0	1	0.81405	0.744046	3.82019	0.583179	0.309158	1.11845	1.11581	0.661947	13.8625	0.2213	0.014919	0.061928	0.1275	0.530126	0.124709	0.025106
115	2019	1	Jilin	0	1	0	0	1	1.00279	2.1456	3.79972	0.267949	0.593146	2.10972	1.91374	0.959711	13.8975	0.228	0.018104	0.04555	0.1275	2.21366	0.518403	0.14141
115	2020	1	Jilin	0	1	0	0	1	1.06218	2.15055	3.78316	0.260597	0.582688	2.35675	2.14997	1.07712	13.9266	0.25	0.017956	0.045864	0.1473	2.23597	0.601372	0.126797
116	2013	0	Jilin	0	1	0	0	1	0.5673	1.5816	4.13549	0.514912	0.308423	0.921848	0.52654	0.377901	13.5995	0.37	0.033535	0.091036	0.0383	0.598982	0.343095	0.250353
116	2014	0	Jilin	0	1	0	0	1	0.62402	1.58863	4.13549	0.476201	0.342503	1.03181	0.641645	0.411582	13.7214	0.38	0.039003	0.092451	0.0383	0.719241	0.380713	0.387518
116	2015	0	Jilin	0	1	0	0	1	0.68921	1.74252	4.13549	0.467764	0.354398	1.07056	0.613159	0.398736	13.7691	0.4	0.034991	0.092422	0.0416	0.757643	0.380311	0.248784
116	2016	0	Jilin	0	1	0	0	1	0.80342	1.8962	4.11529	0.442455	0.397867	1.1617	0.751383	0.427829	13.8584	0.36	0.03651	0.095452	0.0246	0.899228	0.360891	0.253552
116	2017	0	Jilin	0	1	0	0	1	0.90651	1.99203	4.09829	0.430232	0.41919	1.2117	0.890069	0.568431	13.9305	0.37	0.035779	0.097296	0.114	0.974335	0.349972	0.165652
116	2018	0	Jilin	0	1	0	0	1	0.9988	2.07969	4.08603	0.125675	0.651929	1.83641	1.37216	0.933788	13.9937	0.3811	0.035132	0.101042	0.1037	5.18742	1.76962	0.149188
116	2019	0	Jilin	0	1	0	0	1	1.10523	2.20086	4.07408	0.201098	0.577836	1.97468	1.39802	0.839862	14.0489	0.394	0.034152	0.096628	0.1056	2.87341	1.0993	0.161275
116	2020	1	Jilin	0	1	0	0	1	1.1686	2.2076	4.07547	0.179053	0.563625	2.21005	1.46073	0.911193	14.0973	0.4	0.032775	0.096871	0.1045	3.14782	1.43713	0.156636
117	2013	0	Jilin	0	1	0	0	1	0.5737	1.6	4.04452	0.35297	0.529907	0.876432	0.613782	0.269819	12.9954	0.22	0.041812	0.090023	0.0957	1.50128	0.33182	0.267583
117	2014	0	Jilin	0	1	0	0	1	0.70529	1.66667	4.04452	0.354058	0.526283	0.983207	0.785564	0.259462	13.1358	0.24	0.036684	0.103286	0.1111	1.48643	0.337965	0.301502
117	2015	0	Jilin	0	1	0	0	1	0.69278	1.77464	4.04452	0.346086	0.53774	1.05162	0.923234	0.287376	13.1874	0.27	0.032586	0.096392	0.1111	1.55378	0.33568	0.245381
117	2016	0	Jilin	0	1	0	0	1	0.75284	1.87902	4.00914	0.314543	0.592768	1.08231	1.09919	0.418608	13.248	0.27	0.032463	0.09917	0.1295	1.88454	0.29468	0.173113
117	2017	0	Jilin	0	1	0	0	1	0.83316	2.02464	3.99423	0.339984	0.575882	1.32078	1.33513	0.514862	13.314	0.28	0.031872	0.097138	0.1439	1.69385	0.247467	0.121515
117	2018	0	Jilin	0	1	0	0	1	0.91553	2.06221	3.98315	0.124635	0.763793	1.23958	1.26277	0.814803	13.3724	0.2946	0.031243	0.099481	0.1569	6.12825	0.895195	0.069513
117	2019	0	Jilin	0	1	0	0	1	1.01958	2.19713	3.97093	0.315582	0.540279	1.8174	1.77945	0.829024	13.4242	0.305	0.03145	0.101487	0.1425	1.71201	0.456742	0.09477
117	2020	1	Jilin	0	1	0	0	1	1.07493	2.19932	3.96733	0.303349	0.523438	2.11341	1.84166	0.916386	13.4702	0.32	0.032526	0.076001	0.1573	1.72553	0.571	0.090018
118	2013	0	Heilongjiang	0	1	0	0	1	0.4451	1.2671	4.21808	0.27795	0.418759	0.502954	0.4562	0.279118	12.6617	0.4	0.051265	0.068813	0.0906	1.5066	1.09117	0.225366
118	2014	0	Heilongjiang	0	1	0	0	1	0.56721	1.66489	4.21848	0.254667	0.464045	0.511111	0.409064	0.277265	12.9595	0.43	0.049728	0.056708	0.0932	1.82216	1.10454	0.455534
118	2015	0	Heilongjiang	0	1	0	0	1	0.61837	1.77756	4.21888	0.258197	0.41505	0.524883	0.344337	0.246047	12.9646	0.45	0.049904	0.062198	0.0951	1.60749	1.26552	0.228181
118	2016	0	Heilongjiang	0	1	0	0	1	0.67645	1.87638	4.22922	0.270545	0.427933	0.579347	0.362958	0.229069	13.1519	0.45	0.050524	0.073279	0.0932	1.58174	1.1145	0.15607
118	2017	0	Heilongjiang	0	1	0	0	1	0.74151	1.97905	4.21246	0.235916	0.527072	0.709022	0.44535	0.313575	13.3249	0.48	0.04088	0.07807	0.125	2.23415	1.00464	0.146114
118	2018	0	Heilongjiang	0	1	0	0	1	0.72508	2.17367	4.20599	0.222073	0.556344	0.81476	0.683375	0.390468	13.4887	0.501	0.038271	0.079926	0.1385	2.50523	0.997791	0.13934
118	2019	0	Heilongjiang	0	1	0	0	1	0.70597	2.36792	4.19949	0.120207	0.609503	0.951349	0.990885	0.437529	13.6437	0.529	0.046715	0.082658	0.179	5.07046	2.24854	0.116607
118	2020	1	Heilongjiang	0	1	0	0	1	0.92745	2.05683	4.20112	0.122947	0.599615	1.15608	1.05563	0.468307	13.7904	0.57	0.045373	0.068311	0.179	4.87702	2.25657	0.061205
119	2013	0	Heilongjiang	0	1	0	0	1	0.9713	1.3239	4.717	0.256335	0.25362	0.451588	0.489675	0.26112	12.8011	1.45	0.147052	0.13725	0.126	0.989412	1.91174	0.162913
119	2014	0	Heilongjiang	0	1	0	0	1	1.05974	1.47719	4.718	0.25198	0.26079	0.580585	0.827188	0.323646	13.2589	1.65	0.140991	0.141734	0.124	1.03496	1.9336	0.157968
119	2015	0	Heilongjiang	0	1	0	0	1	1.11194	1.57316	4.719	0.304585	0.260254	0.627773	0.662944	0.374839	13.417	1.72	0.142179	0.144821	0.1358	0.854454	1.4287	0.130801
119	2016	0	Heilongjiang	0	1	0	0	1	1.22183	1.67273	4.72	0.338247	0.268412	0.726644	0.570133	0.403762	13.6106	1.76	0.141055	0.14887	0.09	0.79354	1.16288	0.11792
119	2017	0	Heilongjiang	0	1	0	0	1	1.34299	1.77423	4.721	0.237448	0.304359	0.854805	0.580656	0.487872	13.7397	1.81	0.137253	0.150508	0.09	1.28179	1.92965	0.090742
119	2018	0	Heilongjiang	0	1	0	0	1	1.41421	1.81178	4.722	0.257171	0.294998	0.857322	0.483288	0.409949	13.8484	1.78	0.132851	0.191057	0.09	1.14709	1.74138	0.103113
119	2019	1	Heilongjiang	0	1	0	0	1	1.46337	1.83177	4.723	0.261732	0.301465	0.971573	0.416235	0.399138	13.9399	1.81	0.129127	0.199546	0.091	1.15181	1.6689	0.113503
119	2020	1	Heilongjiang	0	1	0	0	1	1.5004	1.84708	4.72401	0.271229	0.269843	1.05285	0.428409	0.359177	14.017	1.85	0.121077	0.200049	0.13	0.99489	1.69203	0.136323
120	2013	0	Heilongjiang	0	1	0	0	1	0.4673	1.2332	4.3673	0.307646	0.302094	0.539241	0.525624	0.383504	12.3779	0.74	0.068807	0.07724	0.135	0.981953	1.26853	0.119198
120	2014	0	Heilongjiang	0	1	0	0	1	0.52534	1.42074	4.34709	0.269553	0.319485	0.641579	0.573431	0.40691	12.5993	0.76	0.070306	0.078459	0.1656	1.18524	1.5246	0.12864
120	2015	0	Heilongjiang	0	1	0	0	1	0.57092	1.50427	4.32647	0.183332	0.359309	0.830072	0.705709	0.469393	12.3692	0.77	0.071225	0.079757	0.1723	1.95988	2.4947	0.127337
120	2016	0	Heilongjiang	0	1	0	0	1	0.62508	1.58766	4.30542	0.195321	0.357149	0.89566	0.72902	0.458831	12.6498	0.83	0.072718	0.081516	0.1847	1.82853	2.29126	0.126202
120	2017	0	Heilongjiang	0	1	0	0	1	0.6858	1.67457	4.28391	0.201672	0.364603	0.981755	0.776174	0.492367	12.7574	0.85	0.072796	0.082893	0.1847	1.8079	2.15064	0.114723
120	2018	0	Heilongjiang	0	1	0	0	1	0.66051	1.75083	4.26194	0.202791	0.366045	1.04711	0.690998	0.462081	12.8563	0.857	0.069295	0.097254	0.2089	1.80503	2.12615	0.124774
120	2019	1	Heilongjiang	0	1	0	0	1	0.65066	1.81062	4.23946	0.159375	0.431484	1.13658	0.575541	0.442354	12.947	0.868	0.069476	0.101037	0.2125	2.70735	2.56716	0.137235
120	2020	1	Heilongjiang	0	1	0	0	1	0.89126	1.78929	4.21567	0.185093	0.358872	1.31595	0.575465	0.487772	13.0302	0.89	0.066057	0.12098	0.2337	1.93887	2.46381	0.161278
121	2013	0	Heilongjiang	0	1	0	0	1	0.4486	1.1696	4.66356	0.192665	0.317846	0.699198	0.662902	0.338567	12.713	0.7	0.084387	0.076587	0.1268	1.64973	2.54061	0.126675
121	2014	0	Heilongjiang	0	1	0	0	1	0.50938	1.37758	4.62567	0.202822	0.302555	0.755528	0.789395	0.277297	13.0711	0.68	0.073479	0.077924	0.1103	1.49172	2.4387	0.188726
121	2015	0	Heilongjiang	0	1	0	0	1	0.55494	1.45741	4.58629	0.20496	0.298544	0.824194	1.0824	0.368724	13.2759	0.72	0.076185	0.084374	0.1103	1.4566	2.4224	0.147299
121	2016	0	Heilongjiang	0	1	0	0	1	0.61144	1.55578	4.5453	0.257392	0.279227	0.910748	1.20725	0.378315	13.3358	0.73	0.08982	0.088841	0.1134	1.08483	1.80029	0.132899
121	2017	0	Heilongjiang	0	1	0	0	1	0.67443	1.6578	4.50255	0.249309	0.275089	0.956624	1.28094	0.424407	13.1557	0.74	0.090867	0.090297	0.114	1.10341	1.90768	0.084504
121	2018	1	Heilongjiang	0	1	0	0	1	0.65373	1.81605	4.45789	0.213888	0.297576	0.996245	1.18788	0.40816	13.229	0.751	0.085857	0.097049	0.1169	1.39127	2.28408	0.100043
121	2019	1	Heilongjiang	0	1	0	0	1	0.64216	1.97313	4.41115	0.195358	0.334221	1.13825	1.08587	0.446825	13.1992	0.774	0.096866	0.108545	0.2415	1.71082	2.408	0.109614
121	2020	1	Heilongjiang	0	1	0	0	1	0.8809	1.774	4.36108	0.219133	0.289055	1.25195	0.898811	0.456692	13.2113	0.81	0.091662	0.105731	0.23	1.31909	2.24436	0.119977
122	2013	0	Heilongjiang	0	1	0	0	1	0.9441	1.6159	4.3673	0.358621	0.232286	0.548446	0.451651	0.296432	12.8039	0.46	0.065107	0.111511	0.0295	0.64772	1.14074	0.187896
122	2014	0	Heilongjiang	0	1	0	0	1	0.67047	1.8176	4.33434	0.295956	0.247624	0.63409	0.480096	0.330098	12.5255	0.47	0.063807	0.113921	0.078	0.836691	1.54219	0.153962
122	2015	0	Heilongjiang	0	1	0	0	1	0.72914	1.92847	4.30027	0.269216	0.254199	0.762638	0.409206	0.316779	12.6331	0.5	0.063542	0.117123	0.079	0.944219	1.77027	0.184371
122	2016	0	Heilongjiang	0	1	0	0	1	0.80482	2.05651	4.265	0.300742	0.258533	0.763983	0.388627	0.320849	12.8343	0.5	0.062974	0.101112	0.1172	0.859651	1.46546	0.172762
122	2017	0	Heilongjiang	0	1	0	0	1	0.88541	2.17317	4.22843	0.31937	0.287586	0.871446	0.502114	0.288176	12.8781	0.5	0.058535	0.095952	0.1172	0.90048	1.23069	0.19799
122	2018	1	Heilongjiang	0	1	0	0	1	0.91657	2.30254	4.19048	0.321538	0.291133	0.959451	0.510883	0.363011	12.897	0.55	0.058231	0.100328	0.1104	0.905439	1.20462	0.165749
122	2019	1	Heilongjiang	0	1	0	0	1	0.92226	2.41699	4.15103	0.190183	0.361769	1.07386	0.456975	0.411023	12.9051	0.56	0.056944	0.10772	0.1832	1.90222	2.35588	0.111924
122	2020	1	Heilongjiang	0	1	0	0	1	0.9155	2.53193	4.10924	0.204325	0.315078	1.22151	0.478909	0.410948	12.9087	0.59	0.052883	0.107283	0.198	1.54204	2.35213	0.125342
123	2013	0	Heilongjiang	0	1	0	0	1	0.741	1.2051	4.3673	0.383456	0.223871	0.747849	0.692029	0.479937	12.8461	0.53	0.058685	0.055642	0.058	0.583825	1.02404	0.10579
123	2014	0	Heilongjiang	0	1	0	0	1	0.7952	1.30172	4.3673	0.418108	0.208097	0.780274	0.660249	0.485635	13.1605	0.53	0.053886	0.051931	0.118	0.49771	0.894014	0.118971
123	2015	0	Heilongjiang	0	1	0	0	1	0.86262	1.37655	4.3673	0.444186	0.199448	0.900671	0.741393	0.528991	13.421	0.55	0.053354	0.076491	0.1069	0.449018	0.80229	0.145492
123	2016	0	Heilongjiang	0	1	0	0	1	0.92321	1.46303	4.35096	0.481055	0.193174	0.908155	0.71215	0.534044	13.4763	0.56	0.051859	0.055438	0.064	0.401564	0.677203	0.119794
123	2017	0	Heilongjiang	0	1	0	0	1	1.01378	1.54885	4.32791	0.479373	0.200264	0.996028	0.830668	0.600477	13.6942	0.56	0.050452	0.057329	0.064	0.417762	0.668297	0.100528
123	2018	0	Heilongjiang	0	1	0	0	1	1.04228	1.63144	4.32179	0.510022	0.187797	1.03675	0.668395	0.561916	13.9117	0.59	0.048342	0.057261	0.114	0.368214	0.592485	0.171728
123	2019	1	Heilongjiang	0	1	0	0	1	1.20569	1.6717	4.31745	0.351182	0.339869	1.08869	0.595399	0.599254	14.1289	0.594	0.045472	0.057446	0.0459	0.967788	0.879742	0.158915
123	2020	1	Heilongjiang	0	1	0	0	1	1.23022	1.77005	4.316	0.355253	0.33779	1.14997	0.590677	0.51743	14.3457	0.62	0.041549	0.060559	0.114	0.950842	0.864052	0.19325
124	2013	0	Heilongjiang	0	1	0	0	1	0.4793	1.2829	4.34639	0.298565	0.325396	0.478478	0.39797	0.116594	12.9287	0.58	0.070882	0.05781	0.2655	1.08987	1.25949	0.216889
124	2014	0	Heilongjiang	0	1	0	0	1	0.53155	1.40419	4.34539	0.308104	0.31737	0.477214	0.402944	0.127261	13.1606	0.66	0.070114	0.074536	0.1152	1.03008	1.21559	0.207463
124	2015	0	Heilongjiang	0	1	0	0	1	0.57969	1.47904	4.34439	0.316003	0.320673	0.537232	0.376115	0.295725	13.3335	0.69	0.069961	0.076028	0.1603	1.01478	1.14975	0.088989
124	2016	0	Heilongjiang	0	1	0	0	1	0.6343	1.57556	4.34339	0.285341	0.376724	0.651632	0.437201	0.332267	12.9024	0.7	0.070519	0.066589	0.0836	1.32026	1.18432	0.069318
124	2017	0	Heilongjiang	0	1	0	0	1	0.69471	1.66642	4.34239	0.299043	0.39614	0.745597	0.405685	0.467989	12.7212	0.72	0.085491	0.069511	0.1153	1.32469	1.01931	0.043994
124	2018	0	Heilongjiang	0	1	0	0	1	0.72248	1.75352	4.34139	0.254836	0.432309	0.861511	0.403424	0.546667	12.7841	0.739	0.083287	0.071965	0.151	1.69642	1.22767	0.035383
124	2019	0	Heilongjiang	0	1	0	0	1	0.73517	1.82815	4.34039	0.098679	0.437757	1.42186	0.533614	0.806584	12.7623	0.785	0.079698	0.074465	0.1936	4.43618	4.6977	0.043322
124	2020	1	Heilongjiang	0	1	0	0	1	0.95257	1.77761	4.33939	0.090337	0.402683	1.65802	0.604146	0.240085	12.7698	0.82	0.075745	0.073907	0.1741	4.45757	5.61211	0.17497
125	2013	0	Heilongjiang	0	1	0	0	1	0.326	1.4909	3.56495	0.057617	0.21076	0.508826	0.552211	0.111042	10.7019	0.56	0.029451	0.032339	0.026	3.65796	12.6981	0.224711
125	2014	0	Heilongjiang	0	1	0	0	1	0.4144	1.74223	3.56495	0.05298	0.231538	0.718135	0.553455	0.176409	10.5679	0.56	0.034671	0.033616	0.026	4.37026	13.5047	0.139409
125	2015	0	Heilongjiang	0	1	0	0	1	0.46677	1.8518	3.56495	0.052891	0.250798	0.926146	0.481444	0.151692	10.6282	0.58	0.027305	0.03397	0.026	4.7418	13.165	0.171948
125	2016	0	Heilongjiang	0	1	0	0	1	0.51341	1.96741	3.58022	0.044977	0.250366	0.91357	0.449208	0.182472	10.7199	0.59	0.026207	0.037552	0.026	5.56654	15.6671	0.154337
125	2017	0	Heilongjiang	0	1	0	0	1	0.56586	2.09454	3.59525	0.046244	0.260303	0.908137	0.426473	0.187944	10.6666	0.62	0.030327	0.033755	0.026	5.62892	14.9956	0.150434
125	2018	0	Heilongjiang	0	1	0	0	1	0.62492	2.19021	3.61007	0.049242	0.274407	0.986077	0.428608	0.363691	10.6696	0.643	0.02521	0.038228	0.024	5.57264	13.7353	0.086304
125	2019	1	Heilongjiang	0	1	0	0	1	1.24555	2.26868	3.62467	0.018071	0.355973	0.892174	0.479347	0.380695	10.6694	0.668	0.032719	0.066098	0.0706	19.6981	34.6378	0.05512
125	2020	1	Heilongjiang	0	1	0	0	1	1.31814	2.22021	3.63759	0.020617	0.330233	1.03107	0.552288	0.376034	10.6694	0.69	0.031266	0.068097	0.0819	16.0177	31.4866	0.070454
126	2013	0	Heilongjiang	0	1	0	0	1	0.3948	1.696	3.07944	0.114918	0.142386	0.561834	0.426549	0.21206	10.7132	0.29	0.028377	0.035511	0.007	1.23903	6.46286	0.087179
126	2014	0	Heilongjiang	0	1	0	0	1	0.45726	1.85327	3.07944	0.076006	0.205775	0.650889	0.449885	0.246597	10.5791	0.3	0.027591	0.039645	0.0128	2.70736	9.44951	0.077724
126	2015	0	Heilongjiang	0	1	0	0	1	0.51812	1.95926	2.94591	0.089816	0.194306	0.756314	0.426909	0.251885	10.6844	0.4	0.027357	0.041421	0.012	2.16338	7.9705	0.081527
126	2016	0	Heilongjiang	0	1	0	0	1	0.5739	2.06996	3.64759	0.093366	0.21879	0.864134	0.453661	0.315064	10.2666	0.33	0.026871	0.040275	0.012	2.34336	7.36718	0.075287
126	2017	0	Heilongjiang	0	1	0	0	1	0.63189	2.19553	3.6362	0.088655	0.233305	0.76746	0.482409	0.423424	10.2215	0.33	0.026392	0.042266	0.012	2.63161	7.64812	0.054006
126	2018	1	Heilongjiang	0	1	0	0	1	0.70278	2.30179	3.63261	0.080311	0.236792	0.714436	0.421316	0.312484	10.2485	0.358	0.018082	0.04314	0.012	2.94845	8.50321	0.068035
126	2019	1	Heilongjiang	0	1	0	0	1	0.81145	2.39268	3.62031	0.036181	0.279826	0.732157	0.535379	0.308132	10.2324	0.377	0.030857	0.043971	0.012	7.73398	18.9045	0.684585
126	2020	1	Heilongjiang	0	1	0	0	1	0.93132	2.33316	3.61958	0.036771	0.261435	0.781857	0.511084	0.350416	10.242	0.39	0.02978	0.087053	0.012	7.1099	19.0858	0.057376
127	2013	0	Heilongjiang	0	1	0	0	1	0.5177	1.2776	4.29584	0.481353	0.195112	0.538414	0.642089	0.12461	12.9346	0.84	0.058782	0.053721	0.0948	0.40534	0.672138	0.487408
127	2014	0	Heilongjiang	0	1	0	0	1	0.52652	1.3029	4.2581	0.47549	0.201499	0.546063	0.972193	0.123004	12.873	0.88	0.058306	0.059976	0.046	0.423771	0.679325	0.481912
127	2015	0	Heilongjiang	0	1	0	0	1	0.59362	1.3784	4.2581	0.378424	0.276609	0.85504	2.37415	0.171441	11.7226	0.93	0.057467	0.062158	0.1287	0.730948	0.911589	0.415552
127	2016	0	Heilongjiang	0	1	0	0	1	0.65465	1.46591	4.26461	0.373894	0.284379	0.869955	2.67445	0.3644	11.5831	0.97	0.057633	0.068031	0.1137	0.760588	0.913969	0.117002
127	2017	0	Heilongjiang	0	1	0	0	1	0.72152	1.55918	4.25424	0.097099	0.368416	1.13129	3.55491	0.626537	11.473	1.03	0.055569	0.069277	0.1432	3.79422	5.50452	0.086207
127	2018	0	Heilongjiang	0	1	0	0	1	0.7982	1.62623	4.2581	0.105018	0.377627	1.24354	3.16585	0.499429	11.3841	1.06	0.054785	0.071584	0.1672	3.59584	4.92635	0.102848
127	2019	0	Heilongjiang	0	1	0	0	1	0.88131	1.67161	4.23317	0.134476	0.430333	1.04095	2.2954	0.408368	11.3125	1.073	0.054416	0.073569	0.1784	3.20006	3.23619	0.099314
127	2020	1	Heilongjiang	0	1	0	0	1	0.94765	1.61977	3.95093	0.157856	0.390739	1.14142	1.42374	0.420627	11.2547	1.09	0.05298	0.079276	0.2051	2.4753	2.85961	0.085219
128	2013	0	Heilongjiang	0	1	0	0	1	0.3518	1.6432	4.7612	0.313841	0.288557	0.48682	0.235904	0.226675	13.7941	0.3	0.12654	0.114935	0.0812	0.919438	1.26689	0.163668
128	2014	0	Heilongjiang	0	1	0	0	1	0.40287	1.86726	4.7612	0.285515	0.28372	0.465945	0.229821	0.219891	13.9542	0.31	0.125377	0.118656	0.094	0.993713	1.50872	0.157947
128	2015	0	Heilongjiang	0	1	0	0	1	0.45372	1.99112	4.73767	0.264247	0.308153	0.43552	0.216941	0.247326	13.8413	0.4	0.125832	0.122123	0.096	1.16615	1.61818	0.118257
128	2016	0	Heilongjiang	0	1	0	0	1	0.49997	2.11739	4.74289	0.255577	0.325389	0.633825	0.286241	0.249327	13.8451	0.4	0.126291	0.128628	0.098	1.27315	1.63956	0.08939
128	2017	0	Heilongjiang	0	1	0	0	1	0.55203	2.13849	4.84374	0.248254	0.324624	0.654038	0.320851	0.332436	13.8406	0.4	0.123522	0.131562	0.099	1.30763	1.7205	0.064707
128	2018	0	Heilongjiang	0	1	0	0	1	0.67472	2.06366	4.71625	0.245335	0.324111	0.647788	0.292702	0.276029	13.8368	1.046	0.119754	0.134391	0.1012	1.3211	1.75496	0.077387
128	2019	1	Heilongjiang	0	1	0	0	1	0.82284	2.16221	4.70893	0.099849	0.299093	0.971121	0.362256	0.380522	13.8336	1.111	0.120098	0.136692	0.1058	2.99544	6.01965	0.084367
128	2020	1	Heilongjiang	0	1	0	0	1	0.93975	2.17032	4.35639	0.170757	0.256776	1.01146	0.371918	0.355532	13.8309	1.23	0.07609	0.13834	0.1062	1.50375	3.35253	0.090046
129	2013	0	Heilongjiang	0	1	0	0	1	0.3801	1.3735	4.09104	0.365465	0.16786	0.451583	1.10555	0.357508	13.7504	0.3	0.065067	0.037452	0.035	0.459305	1.27693	0.118795
129	2014	0	Heilongjiang	0	1	0	0	1	0.43647	1.67592	4.13549	0.352101	0.186827	0.545362	1.61172	0.330596	13.8695	0.63	0.064552	0.040414	0.0348	0.530606	1.30949	0.130034
129	2015	0	Heilongjiang	0	1	0	0	1	0.4921	1.78486	4.13549	0.338768	0.203368	0.643922	2.64227	0.315745	13.8462	0.64	0.06444	0.054722	0.035	0.600315	1.35156	0.134163
129	2016	0	Heilongjiang	0	1	0	0	1	0.54125	1.87514	4.03591	0.344141	0.223063	0.729987	3.16959	0.396702	13.8751	0.65	0.064083	0.062758	0.0366	0.648175	1.25761	0.102614
129	2017	0	Heilongjiang	0	1	0	0	1	0.59807	1.97223	4.09104	0.291886	0.176477	0.610908	2.82307	0.359056	13.8657	0.65	0.044362	0.063273	0.038	0.604609	1.82139	0.081661
129	2018	0	Heilongjiang	0	1	0	0	1	0.72183	2.06766	4.01406	0.287738	0.18195	0.630653	2.28367	0.307227	13.8684	0.797	0.042621	0.077669	0.1839	0.632345	1.84304	0.093153
129	2019	1	Heilongjiang	0	1	0	0	1	0.811	2.1369	4.01062	0.097268	0.256966	0.80345	2.63467	0.353004	13.8676	0.81	0.041143	0.085102	0.1913	2.64184	6.63904	0.098245
129	2020	1	Heilongjiang	0	1	0	0	1	0.88151	2.08916	3.68017	0.087411	0.248677	0.879385	2.47784	0.395632	13.8678	0.86	0.039215	0.068214	0.1587	2.84493	7.59534	0.132441
130	2013	0	Heilongjiang	0	1	0	0	1	0.307	1.6052	4.21888	0.316888	0.229121	0.420474	0.376226	0.247573	13.3922	0.4	0.048729	0.061299	0.0675	0.723036	1.43266	0.106627
130	2014	0	Heilongjiang	0	1	0	0	1	0.33765	1.74282	4.21888	0.317297	0.231677	0.519624	0.385641	0.228398	13.5728	0.46	0.047116	0.063027	0.0675	0.730157	1.42146	0.125204
130	2015	0	Heilongjiang	0	1	0	0	1	0.67429	1.85667	4.21316	0.301921	0.252256	0.59754	0.557236	0.248763	13.4382	0.51	0.049121	0.066	0.0675	0.835502	1.47662	0.111988
130	2016	0	Heilongjiang	0	1	0	0	1	0.79897	1.95608	4.20923	0.288262	0.251345	0.611553	0.673565	0.271168	13.4175	0.56	0.047453	0.067168	0.0686	0.871932	1.59714	0.090298
130	2017	0	Heilongjiang	0	1	0	0	1	0.92889	2.05939	4.19212	0.335168	0.272956	0.700128	0.822475	0.323629	13.4372	0.57	0.042268	0.073679	0.0792	0.814386	1.16919	0.081812
130	2018	0	Heilongjiang	0	1	0	0	1	1.38894	2.15351	4.1847	0.339752	0.269198	0.712945	0.719718	0.296028	13.4547	0.578	0.032591	0.074741	0.0812	0.792336	1.15099	0.087791
130	2019	1	Heilongjiang	0	1	0	0	1	1.02348	2.22683	4.17847	0.134335	0.316024	1.02909	0.980688	0.403764	13.4703	0.61	0.041193	0.081053	0.0846	2.35251	4.09157	0.0883
130	2020	1	Heilongjiang	0	1	0	0	1	1.07352	2.23048	3.85468	0.132935	0.307734	1.14432	0.923042	0.382784	13.4842	0.65	0.039318	0.085335	0.1011	2.31491	4.20754	0.097939
131	2013	0	Heilongjiang	0	1	0	0	1	0.4939	1.6791	4.04452	0.102686	0.208229	0.244969	0.44844	0.244729	12.5941	0.48	0.038181	0.03993	0.0725	2.02782	6.7106	0.071379
131	2014	0	Heilongjiang	0	1	0	0	1	0.51243	1.8307	4.04452	0.097594	0.193057	0.268791	0.500368	0.19641	12.7614	0.49	0.038255	0.034724	0.041	1.97816	7.26835	0.107943
131	2015	0	Heilongjiang	0	1	0	0	1	0.57336	1.9464	4.05216	0.088348	0.205858	0.326428	0.624134	0.18258	10.3102	0.56	0.038418	0.035904	0.0445	2.33008	7.98879	0.124497
131	2016	0	Heilongjiang	0	1	0	0	1	0.63247	2.06976	3.87526	0.083352	0.215285	0.328293	0.625409	0.204002	12.4059	0.55	0.038257	0.035786	0.0445	2.58286	8.41452	0.106925
131	2017	0	Heilongjiang	0	1	0	0	1	0.69518	2.20301	3.8696	0.096417	0.259218	0.40111	0.741381	0.229015	11.0347	0.64	0.037554	0.037181	0.0516	2.68852	6.68314	0.097207
131	2018	0	Heilongjiang	0	1	0	0	1	0.75965	2.38644	3.86505	0.096366	0.252683	0.375759	0.749561	0.217338	12.108	0.644	0.02668	0.036984	0.0524	2.62211	6.75496	0.100768
131	2019	1	Heilongjiang	0	1	0	0	1	0.82329	2.56359	3.8622	0.057386	0.330683	0.466342	0.76137	0.271036	11.2679	0.644	0.048582	0.049732	0.0391	5.76239	10.6633	0.080081
131	2020	1	Heilongjiang	0	1	0	0	1	0.89144	2.75082	3.86854	0.050483	0.313683	0.526839	0.72961	0.287204	11.9255	0.69	0.046043	0.048916	0.0384	6.21358	12.5949	0.255951
132	2013	0	Heilongjiang	0	1	0	0	1	0.2756	1.7485	3.19722	0.07794	0.231579	0.479171	1.05039	0.350403	10.7318	0.48	0.03549	0.015363	0.003	2.97126	8.8592	0.104011
132	2014	0	Heilongjiang	0	1	0	0	1	0.34169	1.91859	3.19722	0.065776	0.233243	0.494452	0.429209	0.415404	10.8251	0.59	0.020157	0.022135	0.003	3.54603	10.6603	0.092652
132	2015	0	Heilongjiang	0	1	0	0	1	0.38649	2.03895	3.19722	0.062549	0.244062	0.621811	0.435899	0.388122	10.8811	0.66	0.020101	0.02102	0.003	3.9019	11.0886	0.105508
132	2016	0	Heilongjiang	0	1	0	0	1	0.42277	2.14408	3.12585	0.063129	0.263366	0.682515	0.469219	0.383131	10.4579	0.66	0.023127	0.020043	0.003	4.17188	10.6656	0.106555
132	2017	0	Heilongjiang	0	1	0	0	1	0.46431	2.25284	3.11986	0.042556	0.209646	0.513212	0.43402	0.286428	10.2114	0.67	0.023226	0.021741	0.003	4.92632	17.5719	0.093311
132	2018	1	Heilongjiang	0	1	0	0	1	0.51408	2.33933	3.12106	0.040513	0.204223	0.458872	0.43813	0.30078	10.1967	0.694	0.015451	0.022056	0.0008	5.04091	18.6425	0.0896
132	2019	1	Heilongjiang	0	1	0	0	1	0.54717	2.42802	3.11142	0.013613	0.25137	0.482461	0.455422	0.367927	10.1959	0.71	0.023213	0.025737	0.0008	18.4657	53.9947	0.082104
132	2020	1	Heilongjiang	0	1	0	0	1	0.58586	2.5011	3.27551	0.015656	0.240125	0.498027	0.467154	0.364234	10.1958	0.7	0.025798	0.031026	0.0008	15.3371	47.5343	0.090469
133	2013	0	Heilongjiang	0	1	0	0	1	0.7789	1.2828	4.34936	0.259057	0.172326	0.569107	0.28497	0.3057	13.1905	0.34	0.077509	0.107833	0.097	0.665208	2.19495	0.17104
133	2014	0	Heilongjiang	0	1	0	0	1	0.8554	1.44458	4.35036	0.304144	0.175569	0.721697	0.410332	0.351323	13.3993	0.36	0.076408	0.110539	0.1114	0.577255	1.71066	0.164103
133	2015	0	Heilongjiang	0	1	0	0	1	0.93462	1.53292	4.35137	0.30173	0.167459	0.788584	0.35472	0.345839	13.5337	0.36	0.077428	0.108841	0.1932	0.554996	1.75922	0.134769
133	2016	0	Heilongjiang	0	1	0	0	1	1.01136	1.63019	4.35237	0.301019	0.174101	0.86847	0.35562	0.396671	13.5347	0.4	0.077762	0.153072	0.105	0.578372	1.74368	0.118485
133	2017	0	Heilongjiang	0	1	0	0	1	1.11657	1.72743	4.35337	0.321502	0.186027	0.968477	0.372711	0.502817	13.6064	0.43	0.076408	0.136127	0.105	0.578618	1.53178	0.098866
133	2018	1	Heilongjiang	0	1	0	0	1	1.19438	1.81029	4.35437	0.34753	0.200392	1.07438	0.678107	0.479025	13.666	0.47	0.074298	0.146244	0.0714	0.576618	1.30083	0.113388
133	2019	1	Heilongjiang	0	1	0	0	1	1.24528	1.87289	4.35537	0.083284	0.417043	1.4029	0.93693	0.54108	13.7154	0.5	0.092218	0.150989	0.2574	5.00748	5.99963	0.116738
133	2020	1	Heilongjiang	0	1	0	0	1	1.39904	1.82539	4.35637	0.084864	0.379919	1.57331	1.10896	0.547709	13.7565	0.54	0.08496	0.152822	0.2712	4.47678	6.30672	0.097158
134	2013	0	Heilongjiang	0	1	0	0	1	0.5877	1.0237	4.43043	0.253528	0.249233	0.783911	0.674784	0.436894	12.6784	0.43	0.093095	0.054379	0.2	0.983058	1.96128	0.086813
134	2014	0	Heilongjiang	0	1	0	0	1	0.59037	1.27985	4.43033	0.292768	0.222076	0.786191	0.520453	0.401255	12.9085	0.44	0.101815	0.085271	0.2	0.758537	1.65713	0.09846
134	2015	0	Heilongjiang	0	1	0	0	1	0.655	1.37129	4.43023	0.297915	0.222263	0.898657	0.496627	0.420722	13.0333	0.47	0.099585	0.088353	0.2	0.746062	1.61061	0.098551
134	2016	0	Heilongjiang	0	1	0	0	1	0.70746	1.44469	4.43013	0.319202	0.236627	0.980522	0.553134	0.483589	13.1276	0.34	0.099236	0.097477	0.12	0.741308	1.39151	0.086831
134	2017	0	Heilongjiang	0	1	0	0	1	0.78035	1.52659	4.43003	0.310121	0.229568	0.979071	0.551728	0.501745	13.0841	0.48	0.098016	0.116018	0.12	0.740252	1.4843	0.088014
134	2018	0	Heilongjiang	0	1	0	0	1	0.85562	1.59632	4.42993	0.32027	0.230034	1.02746	0.452327	0.497284	13.079	0.475	0.095771	0.110758	0.12	0.718252	1.40411	0.092417
134	2019	1	Heilongjiang	0	1	0	0	1	0.94304	1.65444	4.42983	0.064114	0.400507	1.28383	0.572012	0.507092	13.0783	0.55	0.090939	0.102979	0.1962	6.24684	8.35048	0.099285
134	2020	1	Heilongjiang	0	1	0	0	1	1.00712	1.59851	4.42973	0.065115	0.373279	1.43532	0.710231	0.508776	13.0783	0.58	0.086452	0.112694	0.2253	5.7326	8.62482	0.105913
135	2013	0	Heilongjiang	0	1	0	0	1	0.7255	1.102	4.35954	0.35889	0.156891	0.746119	0.537387	0.43294	12.9615	0.56	0.099015	0.112076	0.092	0.437155	1.34922	0.05691
135	2014	0	Heilongjiang	0	1	0	0	1	0.74318	1.33532	4.35944	0.351185	0.152761	0.802928	0.497211	0.435649	13.0237	0.56	0.096165	0.116535	0.102	0.434988	1.41251	0.064914
135	2015	0	Heilongjiang	0	1	0	0	1	0.79842	1.42146	4.35934	0.345076	0.153473	0.868346	0.493067	0.473289	13.1522	0.63	0.09811	0.118895	0.1836	0.44475	1.45316	0.072674
135	2016	0	Heilongjiang	0	1	0	0	1	0.86339	1.4998	4.35924	0.333738	0.151325	0.969889	0.514191	0.491204	13.1844	0.65	0.098466	0.122632	0.2036	0.453425	1.54294	0.081227
135	2017	0	Heilongjiang	0	1	0	0	1	0.93619	1.58192	4.35914	0.322188	0.13758	0.976166	0.522271	0.570964	13.3474	0.64	0.097822	0.132023	0.2279	0.427017	1.67676	0.068425
135	2018	0	Heilongjiang	0	1	0	0	1	0.98189	1.66238	4.35904	0.332834	0.138619	0.991288	0.487884	0.504453	13.5089	0.65	0.094055	0.134068	0.238	0.416482	1.58802	0.078502
135	2019	0	Heilongjiang	0	1	0	0	1	0.99736	1.72584	4.35894	0.126338	0.311267	1.18504	0.594217	0.565845	13.6689	0.65	0.094725	0.136507	0.2833	2.46377	4.45153	0.071041
135	2020	1	Heilongjiang	0	1	0	0	1	0.99666	1.7834	4.35884	0.133054	0.287115	1.34744	0.64785	0.585462	13.8274	0.68	0.092539	0.137648	0.2807	2.15789	4.35788	0.072596
136	2013	0	Heilongjiang	0	1	0	0	1	0.5773	0.9215	3.99405	0.373625	0.128707	0.48104	0.307022	0.317796	13.1893	0.23	0.072201	0.066635	0.085	0.34448	1.332	0.111598
136	2014	0	Heilongjiang	0	1	0	0	1	0.67904	1.28665	3.99305	0.35017	0.136737	0.499915	0.36506	0.363457	12.7913	0.24	0.069701	0.069717	0.0879	0.390487	1.46527	0.100436
136	2015	0	Heilongjiang	0	1	0	0	1	0.74064	1.38054	3.99205	0.361754	0.132133	0.47131	0.344503	0.339346	12.6868	0.24	0.069229	0.071469	0.0879	0.365257	1.39905	0.101413
136	2016	0	Heilongjiang	0	1	0	0	1	0.79925	1.44632	3.99105	0.358899	0.151373	0.521905	0.347569	0.414922	12.6999	0.26	0.069574	0.077654	0.0879	0.42177	1.36453	0.091436
136	2017	0	Heilongjiang	0	1	0	0	1	0.85879	1.52119	3.99005	0.395471	0.169423	0.890839	0.375021	0.547293	12.6942	0.79	0.058379	0.084687	0.0924	0.428407	1.10022	0.078188
136	2018	0	Heilongjiang	0	1	0	0	1	0.92447	1.58591	3.98905	0.389276	0.173585	0.952651	0.43017	0.547417	12.6896	0.81	0.057051	0.111998	0.2668	0.445916	1.12295	0.07908
136	2019	1	Heilongjiang	0	1	0	0	1	0.98191	1.62877	3.98805	0.073711	0.350887	1.33854	0.553073	0.656645	12.6858	0.84	0.055041	0.130348	0.256	4.76032	7.80623	0.080456
136	2020	1	Heilongjiang	0	1	0	0	1	1.06922	1.59983	3.98705	0.077993	0.327627	1.53895	0.718073	0.616888	12.6828	0.92	0.053152	0.143755	0.2415	4.20074	7.62096	0.06783
137	2013	0	Heilongjiang	0	1	0	0	1	0.6682	1.3053	5.36945	0.259898	0.223978	0.611168	0.601953	0.282047	13.4369	0.52	0.127114	0.110607	0.1454	0.861791	1.98587	0.106559
137	2014	0	Heilongjiang	0	1	0	0	1	0.74584	1.62557	5.36945	0.250573	0.244887	0.656441	0.722157	0.274938	13.5765	0.65	0.124009	0.112495	0.3601	0.977309	2.01355	0.120368
137	2015	0	Heilongjiang	0	1	0	0	1	0.82053	1.73907	5.35671	0.24577	0.244601	0.716908	0.99808	0.310951	13.6575	0.66	0.123505	0.110135	0.3801	0.995244	2.0736	0.105551
137	2016	0	Heilongjiang	0	1	0	0	1	0.89018	1.85113	5.34925	0.252092	0.261744	0.818815	1.08033	0.332684	13.7636	0.74	0.123268	0.122457	0.3801	1.03829	1.92851	0.107072
137	2017	0	Heilongjiang	0	1	0	0	1	0.96613	1.95973	5.33244	0.205682	0.23585	0.821098	0.976722	0.382418	13.8462	0.96	0.119912	0.120097	0.3801	1.14667	2.7152	0.086036
137	2018	0	Heilongjiang	0	1	0	0	1	1.01199	2.0606	5.32625	0.209895	0.239736	0.944476	0.852476	0.42829	13.9149	0.98	0.114313	0.122457	0.3253	1.14217	2.62211	0.080782
137	2019	0	Heilongjiang	0	1	0	0	1	1.04129	2.1406	5.32121	0.033179	0.332315	1.39509	1.25901	0.541712	13.972	1.24	0.110756	0.120097	0.3253	10.0158	19.1237	0.081999
137	2020	1	Heilongjiang	0	1	0	0	1	1.06166	2.21318	5.44265	0.038111	0.309669	1.61524	1.29886	0.601608	14.0194	1.38	0.101797	0.122457	0.3253	8.12538	17.1136	0.073576
138	2013	0	Anhui	0	1	0	0	1	0.7148	1.5581	5.93447	0.289053	0.358818	1.02132	0.57242	0.333262	13.5978	2.19	0.385784	0.179887	0.6354	1.24136	1.21821	0.199448
138	2014	0	Anhui	0	1	0	0	1	0.76889	1.76021	5.62595	0.296783	0.362995	1.11169	0.622876	0.352474	13.7608	1.95	0.395698	0.220058	0.7048	1.2231	1.14664	0.207584
138	2015	0	Anhui	0	1	0	0	1	0.8283	1.88378	5.63861	0.275484	0.400475	1.20524	0.702189	0.344708	13.8698	2.11	0.352327	0.20639	0.7047	1.45371	1.17654	0.237362
138	2016	0	Anhui	0	1	0	0	1	0.88184	1.99225	5.64727	0.282485	0.406388	1.21441	0.768653	0.359038	14.0845	1.92	0.362552	0.256701	0.7497	1.43862	1.10139	0.243487
138	2017	0	Anhui	0	1	0	0	1	0.94902	2.13488	5.6606	0.331196	0.393917	1.15176	1.12373	0.351568	14.1806	2.46	0.372597	0.222577	0.7801	1.18938	0.829983	0.279223
138	2018	0	Anhui	0	1	0	0	1	1.02253	2.2809	5.65776	0.350233	0.394608	1.1882	1.29354	0.358271	14.2304	2.33	0.379578	0.302865	0.9684	1.1267	0.728608	0.198866
138	2019	1	Anhui	0	1	0	0	1	1.09819	2.42738	5.65681	0.2804	0.485003	1.14471	1.36353	0.36124	14.2563	2.41	0.378458	0.311004	1.0668	1.72968	0.836654	0.306652
138	2020	1	Anhui	0	1	0	0	1	1.15279	2.51616	5.54116	0.253089	0.497925	1.26382	1.44841	0.374895	14.2697	2.36	0.370002	0.377201	1.0591	1.96739	0.983789	0.207745
139	2013	0	Anhui	0	1	0	0	1	0.5974	1.9581	5.04305	0.459306	0.291342	0.770139	0.46104	0.25951	14.2361	0.24	0.159452	0.100771	0.3385	0.634309	0.542886	0.156014
139	2014	0	Anhui	0	1	0	0	1	0.78837	2.00637	4.95124	0.463167	0.292072	0.827706	0.561522	0.270416	14.3856	0.26	0.147741	0.10234	0.3835	0.630597	0.528218	0.160407
139	2015	0	Anhui	0	1	0	0	1	0.85113	2.05034	4.957	0.448703	0.314441	0.93385	0.626306	0.293267	14.4565	0.29	0.140646	0.114518	0.365	0.700777	0.528095	0.241343
139	2016	0	Anhui	0	1	0	0	1	0.90905	2.17519	4.96272	0.439187	0.326592	0.971237	0.655126	0.301493	14.5626	0.3	0.137575	0.113458	0.365	0.743628	0.533305	0.24297
139	2017	0	Anhui	0	1	0	0	1	0.98203	2.32408	4.96651	0.446675	0.336027	0.999152	0.813627	0.309851	14.6562	0.3	0.139033	0.120009	0.41	0.752285	0.486481	0.23242
139	2018	0	Anhui	0	1	0	0	1	1.06359	2.47447	4.97406	0.446823	0.346448	1.00723	0.909069	0.361265	14.7433	0.32	0.140303	0.153257	0.455	0.775358	0.462746	0.115672
139	2019	0	Anhui	0	1	0	0	1	1.14572	2.6193	4.97968	0.389261	0.460848	0.774697	0.738143	0.276152	14.8242	0.34	0.141922	0.149649	0.478	1.18391	0.385067	0.212005
139	2020	1	Anhui	0	1	0	0	1	1.20826	2.68422	4.7612	0.378053	0.462909	0.842001	0.84029	0.266495	14.8996	0.36	0.143802	0.163346	0.478	1.22446	0.420674	0.132805
140	2013	0	Anhui	0	1	0	0	1	0.6995	1.7581	5.00733	0.431207	0.267415	0.77658	0.450512	0.225619	14.3805	0.36	0.282283	0.144424	0.2618	0.620154	0.698917	0.184573
140	2014	0	Anhui	0	1	0	0	1	0.79467	1.79279	5.05352	0.434949	0.271713	0.824404	0.516815	0.234391	14.5882	0.36	0.27847	0.165554	0.2688	0.624699	0.674419	0.197699
140	2015	0	Anhui	0	1	0	0	1	0.85949	1.92975	5.09767	0.420881	0.335881	0.915103	0.572938	0.242389	14.7149	0.44	0.278457	0.150197	0.3088	0.798044	0.577926	0.265865
140	2016	0	Anhui	0	1	0	0	1	0.91802	2.10281	5.10594	0.40924	0.355776	0.963861	0.602179	0.253064	14.8618	0.47	0.279039	0.215314	0.3488	0.869359	0.574197	0.256089
140	2017	0	Anhui	0	1	0	0	1	0.98939	2.25277	5.11578	0.410976	0.366229	0.987983	0.699452	0.256189	14.9996	0.46	0.280753	0.178371	0.32	0.89112	0.54211	0.249976
140	2018	0	Anhui	0	1	0	0	1	1.07534	2.40279	5.12713	0.438191	0.343977	1.01215	0.721717	0.268192	15.1222	0.49	0.284613	0.192643	0.6278	0.784993	0.497143	0.143853
140	2019	1	Anhui	0	1	0	0	1	1.15769	2.55044	5.13357	0.411528	0.395154	0.938175	0.699196	0.242352	15.2313	0.52	0.284201	0.199864	0.7038	0.960212	0.469754	0.241265
140	2020	1	Anhui	0	1	0	0	1	1.21954	2.61117	5.11578	0.396745	0.397069	1.01338	0.776734	0.236275	15.3285	0.55	0.28275	0.22364	0.337	1.00082	0.519692	0.1561
141	2013	0	Anhui	0	1	0	0	1	0.6752	1.9581	5.14313	0.442683	0.266138	1.06297	0.599287	0.233725	14.2853	0.31	0.205696	0.105282	0.2799	0.601194	0.658018	0.195089
141	2014	0	Anhui	0	1	0	0	1	0.80481	2.10479	5.5326	0.44377	0.271885	1.15832	0.676102	0.240755	14.3728	0.26	0.186846	0.112402	0.3529	0.612671	0.640749	0.202845
141	2015	0	Anhui	0	1	0	0	1	0.86804	2.11301	5.14313	0.432227	0.307544	1.31855	0.736431	0.257956	14.4796	0.26	0.179683	0.116155	0.3529	0.711534	0.602067	0.279067
141	2016	0	Anhui	0	1	0	0	1	0.92719	2.26303	5.15888	0.419712	0.315799	1.37701	0.722001	0.263439	14.5854	0.25	0.162425	0.119263	0.3529	0.752419	0.630167	0.274572
141	2017	0	Anhui	0	1	0	0	1	1.00014	2.41547	5.00003	0.440379	0.328898	1.45023	0.83135	0.274754	14.6693	0.26	0.155831	0.121491	0.2849	0.746853	0.52392	0.272404
141	2018	0	Anhui	0	1	0	0	1	1.08616	2.56843	5.00915	0.466061	0.331976	1.51263	0.935026	0.301651	14.7374	0.25	0.157766	0.123222	0.2849	0.7123	0.433416	0.161817
141	2019	0	Anhui	0	1	0	0	1	1.17084	2.71626	5.01458	0.427962	0.410996	1.19028	0.772201	0.234337	14.7926	0.26	0.158598	0.125453	0.3039	0.960356	0.3763	0.248612
141	2020	1	Anhui	0	1	0	0	1	1.23625	2.77835	4.83377	0.418635	0.407643	1.30156	0.865348	0.241614	14.8373	0.26	0.156997	0.160221	0.3239	0.973742	0.414971	0.162636
142	2013	0	Anhui	0	1	0	0	1	0.5612	1.7581	4.47816	0.553125	0.233036	0.724063	0.661122	0.295696	14.0608	0.12	0.10407	0.105179	0.2637	0.421308	0.386602	0.160925
142	2014	0	Anhui	0	1	0	0	1	0.78749	1.82389	4.48124	0.558856	0.233243	0.79821	0.722199	0.303559	14.2293	0.12	0.100676	0.117281	0.2917	0.417357	0.372014	0.177262
142	2015	0	Anhui	0	1	0	0	1	0.85483	1.96453	4.49043	0.546719	0.253801	0.926689	0.794868	0.325926	14.305	0.13	0.099762	0.130259	0.3277	0.464226	0.364868	0.169003
142	2016	0	Anhui	0	1	0	0	1	0.9164	2.11561	4.49043	0.541031	0.268821	1.01902	0.797963	0.331939	14.3968	0.14	0.068004	0.109024	0.3667	0.496868	0.351678	0.263677
142	2017	0	Anhui	0	1	0	0	1	0.99533	2.25815	4.49651	0.526674	0.291361	1.07374	0.843819	0.338176	14.4823	0.12	0.10143	0.14646	0.3227	0.553209	0.345499	0.265112
142	2018	1	Anhui	0	1	0	0	1	1.07987	2.40344	4.50556	0.543342	0.311188	1.1503	0.944801	0.373821	14.5622	0.122	0.113411	0.146055	0.3227	0.57273	0.267709	0.136939
142	2019	1	Anhui	0	1	0	0	1	1.15778	2.54873	4.51155	0.39962	0.472283	1.04548	0.89521	0.337792	14.6367	0.123	0.114702	0.159068	0.3327	1.18183	0.320547	0.22852
142	2020	1	Anhui	0	1	0	0	1	1.21867	2.61685	4.47816	0.366982	0.492778	1.18357	1.05309	0.346525	14.7062	0.124	0.107423	0.172585	0.3369	1.34278	0.382143	0.146167
143	2013	0	Anhui	0	1	0	0	1	0.6193	1.9581	4.918	0.548776	0.259938	0.825817	0.624426	0.198334	14.3615	0.35	0.185946	0.153418	0.305	0.473668	0.348569	0.247541
143	2014	0	Anhui	0	1	0	0	1	0.8178	2.10479	4.92197	0.551592	0.260474	0.880719	0.638268	0.212582	14.4756	0.36	0.163584	0.171792	0.3504	0.472222	0.340856	0.3755
143	2015	0	Anhui	0	1	0	0	1	0.88126	2.24468	4.92593	0.537014	0.284387	0.981566	0.67411	0.220379	14.558	0.38	0.155278	0.174003	0.386	0.52957	0.332577	0.350199
143	2016	0	Anhui	0	1	0	0	1	0.94275	2.3819	4.93183	0.543983	0.30248	1.06268	0.712595	0.239824	14.6537	0.4	0.148855	0.187747	0.388	0.556047	0.282113	0.334816
143	2017	0	Anhui	0	1	0	0	1	1.01976	2.52498	4.93769	0.550217	0.30545	1.06578	0.712696	0.241428	14.7392	0.38	0.143313	0.189915	0.423	0.555144	0.262321	0.324187
143	2018	0	Anhui	0	1	0	0	1	1.10946	2.66915	4.94932	0.520638	0.34545	1.06938	0.703529	0.249556	14.8163	0.38	0.141571	0.194045	0.423	0.663513	0.25721	0.202022
143	2019	1	Anhui	0	1	0	0	1	1.19163	2.80376	4.95508	0.448042	0.425138	0.962859	0.67262	0.233992	14.8856	0.39	0.142844	0.196377	0.479	0.94888	0.283056	0.296569
143	2020	1	Anhui	0	1	0	0	1	1.26171	3.0562	4.78646	0.432992	0.431716	1.05958	0.750876	0.229495	14.9481	0.39	0.14244	0.197634	0.476	0.997053	0.31246	0.197872
144	2013	0	Anhui	0	1	0	0	1	0.7106	1.9581	4.95124	0.562789	0.275602	0.482848	0.492421	0.152893	14.325	0.28	0.246335	0.176321	0.0831	0.489709	0.287159	0.363887
144	2014	0	Anhui	0	1	0	0	1	0.76465	2.03619	4.98341	0.559752	0.282375	0.557036	0.573173	0.188591	14.4895	0.29	0.210664	0.204763	0.092	0.504465	0.282041	0.296032
144	2015	0	Anhui	0	1	0	0	1	0.82519	2.24468	4.99452	0.530098	0.32224	0.62547	0.672955	0.209785	14.5539	0.3	0.215193	0.224204	0.0973	0.607888	0.278556	0.259527
144	2016	0	Anhui	0	1	0	0	1	0.8784	2.29749	5.00003	0.46169	0.393611	0.664767	0.845324	0.18477	14.6061	0.29	0.221371	0.228842	0.1001	0.852544	0.313414	0.288386
144	2017	0	Anhui	0	1	0	0	1	0.95402	2.46593	5.01998	0.298584	0.549064	0.719152	1.74783	0.217546	14.6212	0.29	0.226967	0.267517	0.1055	1.83889	0.510249	0.24319
144	2018	0	Anhui	0	1	0	0	1	1.03002	2.62356	5.0413	0.460106	0.422132	0.675489	0.674618	0.179503	14.625	0.29	0.236053	0.288763	0.1032	0.917466	0.255945	0.257017
144	2019	0	Anhui	0	1	0	0	1	1.10935	2.78477	5.0483	0.458769	0.435887	0.610616	0.65313	0.186929	14.6259	0.29	0.247848	0.281178	0.1011	0.950122	0.229622	0.215358
144	2020	1	Anhui	0	1	0	0	1	1.17457	2.85647	4.98527	0.477352	0.430815	0.649482	1.03676	0.161192	14.6262	0.3	0.258005	0.271248	0.113	0.90251	0.241748	0.227717
145	2013	0	Anhui	0	1	0	0	1	0.5721	1.9581	6.04019	0.207603	0.297338	1.60185	0.575397	0.36728	13.9017	1.62	0.694553	0.257603	1.1668	1.43225	2.38503	0.159564
145	2014	0	Anhui	0	1	0	0	1	0.77026	2.00637	6.06196	0.209263	0.300037	1.74391	0.617094	0.35023	14.0647	1.64	0.68707	0.304507	1.7344	1.43378	2.34525	0.216389
145	2015	0	Anhui	0	1	0	0	1	0.83491	2.09698	6.07079	0.247718	0.327938	1.74155	0.730969	0.393314	14.1174	1.65	0.689682	0.32111	1.6486	1.32384	1.71275	0.198674
145	2016	0	Anhui	0	1	0	0	1	0.89215	2.23142	6.08203	0.246033	0.34965	1.80374	0.838528	0.365925	14.3061	1.68	0.703445	0.404298	0.8618	1.42115	1.64335	0.245982
145	2017	0	Anhui	0	1	0	0	1	0.97072	2.39331	6.09436	0.258685	0.364056	1.86209	1.06113	0.388012	14.4469	1.38	0.71905	0.481043	0.627	1.40733	1.45858	0.270311
145	2018	0	Anhui	0	1	0	0	1	1.04898	2.55354	6.10595	0.265761	0.390569	1.84669	1.27477	0.398885	14.5788	1.26	0.73848	0.559885	1.0064	1.46963	1.29314	0.184502
145	2019	0	Anhui	0	1	0	0	1	1.13186	2.71293	6.11139	0.240561	0.539263	1.17484	0.870027	0.266339	14.7023	1.16	0.751887	0.604739	1.0209	2.24169	0.915262	0.290637
145	2020	1	Anhui	0	1	0	0	1	1.20056	2.77494	6.11078	0.241826	0.527962	1.25026	0.991967	0.234965	14.818	1.08	0.765464	0.668	1.0158	2.18323	0.951976	0.20999
146	2013	0	Anhui	0	1	0	0	1	0.5589	1.9581	5.76303	0.330494	0.297169	1.25688	0.561069	0.348071	14.0221	1.2	0.557221	0.274806	0.4827	0.899166	1.12686	0.105837
146	2014	0	Anhui	0	1	0	0	1	0.77194	2.10479	5.74145	0.328015	0.308772	1.35148	0.624652	0.364291	14.2635	1.24	0.552669	0.270861	1.0634	0.941335	1.10731	0.197386
146	2015	0	Anhui	0	1	0	0	1	0.83481	1.95025	5.751	0.323887	0.341655	1.42881	0.747704	0.415073	14.3945	1.21	0.550232	0.28396	0.5077	1.05486	1.03241	0.191156
146	2016	0	Anhui	0	1	0	0	1	0.89062	2.24336	5.76132	0.313942	0.358654	1.51295	0.845448	0.382749	14.4922	1.28	0.551684	0.330911	0.5647	1.14242	1.0431	0.147331
146	2017	0	Anhui	0	1	0	0	1	0.96732	2.40604	5.77322	0.325462	0.370155	1.52661	1.00701	0.38907	14.5833	0.86	0.502965	0.362495	0.4699	1.13732	0.935233	0.144609
146	2018	0	Anhui	0	1	0	0	1	1.0426	2.56344	5.78832	0.331699	0.391647	1.54285	1.26947	0.412209	14.6638	0.76	0.570358	0.424137	0.6031	1.18073	0.834088	0.146026
146	2019	0	Anhui	0	1	0	0	1	1.12087	2.71176	5.79414	0.284325	0.490242	1.13264	1.06362	0.300494	14.7349	0.69	0.568232	0.427198	0.9306	1.72423	0.725672	0.156723
146	2020	1	Anhui	0	1	0	0	1	1.18673	2.771	5.77407	0.292616	0.490543	1.27246	1.24442	0.279777	14.7976	0.64	0.567652	0.482721	0.9306	1.6764	0.74104	0.172316
147	2013	0	Anhui	0	1	0	0	1	0.6795	1.9581	5.80402	0.53666	0.215946	0.827279	0.452771	0.257953	14.2704	1	0.451794	0.309929	0.48	0.40239	0.460883	0.298771
147	2014	0	Anhui	0	1	0	0	1	0.81111	2.10479	5.81218	0.536903	0.218058	0.894341	0.494363	0.230705	14.5819	1.05	0.468293	0.350072	2.079	0.40614	0.456394	0.570432
147	2015	0	Anhui	0	1	0	0	1	0.87795	2.23477	5.8227	0.536559	0.238876	0.942334	0.585163	0.265055	14.6944	1.11	0.482765	0.384311	1.1168	0.445201	0.418527	0.441199
147	2016	0	Anhui	0	1	0	0	1	0.93817	2.38906	5.83231	0.506969	0.275891	0.9539	0.671925	0.242855	14.8893	1.13	0.504484	0.410727	0.513	0.544197	0.42831	0.458643
147	2017	0	Anhui	0	1	0	0	1	1.02089	2.5677	5.8434	0.508647	0.293006	0.962057	0.786174	0.261325	14.9995	1.17	0.533934	0.330493	0.513	0.576049	0.390028	0.464917
147	2018	0	Anhui	0	1	0	0	1	1.10438	2.74268	5.85748	0.518434	0.303372	0.975036	0.945679	0.277644	15.0922	1.21	0.563989	0.352029	0.51	0.585171	0.343704	0.285004
147	2019	1	Anhui	0	1	0	0	1	1.18947	2.92196	5.86368	0.413704	0.447237	0.757683	0.789253	0.214871	15.1701	1.25	0.566122	0.402042	1.2633	1.08106	0.336133	0.478301
147	2020	1	Anhui	0	1	0	0	1	1.25943	2.99435	5.78666	0.389926	0.453956	0.859656	0.9073	0.20885	15.2356	1.29	0.576275	0.563972	0.5184	1.16421	0.40038	0.321252
148	2013	0	Anhui	0	1	0	0	1	0.7193	2.1591	5.39568	0.443948	0.251232	0.873405	0.377916	0.206809	14.4775	1.08	0.279416	0.244957	0.281	0.565904	0.686611	0.203363
148	2014	0	Anhui	0	1	0	0	1	0.83601	2.2605	5.40305	0.447879	0.254679	0.946106	0.415724	0.200658	14.7039	1.08	0.271719	0.247142	0.2708	0.568634	0.664267	0.216051
148	2015	0	Anhui	0	1	0	0	1	0.9071	2.40356	5.41037	0.44009	0.292369	0.967331	0.448638	0.20355	14.8517	1.2	0.268519	0.293753	0.349	0.66434	0.607921	0.212982
148	2016	0	Anhui	0	1	0	0	1	0.967	2.6204	5.42125	0.447232	0.32421	0.984063	0.510443	0.197148	14.9656	1.22	0.270459	0.305965	0.3358	0.724927	0.511051	0.33356
148	2017	0	Anhui	0	1	0	0	1	1.04655	2.80604	5.43201	0.452902	0.340629	0.962636	0.684472	0.219095	15.0683	0.63	0.277677	0.336687	0.3996	0.752104	0.455879	0.210843
148	2018	0	Anhui	0	1	0	0	1	1.13037	2.68904	5.43675	0.457028	0.37969	1.0291	0.927333	0.238466	15.1559	0.71	0.275762	0.317209	0.41	0.830779	0.357289	0.216845
148	2019	1	Anhui	0	1	0	0	1	1.21585	2.8359	5.4403	0.326008	0.515844	1.00098	0.951296	0.220764	15.2307	0.77	0.292134	0.336179	0.2331	1.5823	0.485105	0.229939
148	2020	1	Anhui	0	1	0	0	1	1.28437	2.90065	5.3386	0.311328	0.519095	1.10793	1.17859	0.203879	15.2945	0.81	0.305057	0.393647	0.2331	1.66736	0.544689	0.262765
149	2013	0	Anhui	0	1	0	0	1	0.798	1.5581	5.74145	0.405249	0.313778	0.790632	0.355787	0.203372	14.6226	1.55	0.413389	0.261377	0.3526	0.774286	0.693333	0.226325
149	2014	0	Anhui	0	1	0	0	1	0.81593	1.65254	5.751	0.407252	0.319866	0.843554	0.359041	0.191941	14.857	1.55	0.415475	0.215256	0.349	0.785426	0.670055	0.247787
149	2015	0	Anhui	0	1	0	0	1	0.88398	1.76854	5.76132	0.413652	0.332833	0.890231	0.403088	0.206025	14.9774	1.63	0.406141	0.249609	0.327	0.80462	0.612981	0.250206
149	2016	0	Anhui	0	1	0	0	1	0.94103	1.96017	5.77407	0.387393	0.392258	0.913277	0.461666	0.204114	15.0555	1.7	0.398572	0.162005	0.3266	1.01256	0.568905	0.403961
149	2017	0	Anhui	0	1	0	0	1	1.01759	2.10309	5.78499	0.394377	0.407712	0.901338	0.566143	0.222112	15.1624	1.3	0.401741	0.204126	0.332	1.03381	0.501832	0.27952
149	2018	0	Anhui	0	1	0	0	1	1.09809	2.63244	5.78582	0.383776	0.430455	0.895437	0.659824	0.234428	15.2599	0.88	0.409409	0.1787	0.352	1.12163	0.484069	0.295621
149	2019	0	Anhui	0	1	0	0	1	1.18479	2.7763	5.78916	0.429246	0.403725	0.789459	0.642729	0.213536	15.3489	0.69	0.404482	0.281646	0.4492	0.940544	0.38912	0.275079
149	2020	1	Anhui	0	1	0	0	1	1.25086	2.85	5.65871	0.42031	0.401806	0.857124	0.781201	0.212047	15.4301	0.6	0.408079	0.404852	0.4479	0.955975	0.423219	0.268406
150	2013	0	Anhui	0	1	0	0	1	0.6358	1.9581	5.59512	0.317678	0.331017	0.785456	0.297514	0.234062	14.4404	1.63	0.350854	0.213144	0.318	1.04199	1.10608	0.155037
150	2014	0	Anhui	0	1	0	0	1	0.82666	1.90795	5.60717	0.317784	0.338232	0.835853	0.338803	0.227252	14.6028	1.63	0.365733	0.226631	0.2843	1.06435	1.08245	0.17035
150	2015	0	Anhui	0	1	0	0	1	0.89311	1.86066	5.61809	0.324461	0.381524	0.860398	0.357763	0.23555	14.7451	1.72	0.374035	0.233424	0.3325	1.17587	0.906345	0.176805
150	2016	0	Anhui	0	1	0	0	1	0.95173	2.02452	5.63376	0.335902	0.387917	0.880108	0.426505	0.224243	14.8928	1.78	0.390889	0.227619	0.37	1.15485	0.822208	0.250414
150	2017	0	Anhui	0	1	0	0	1	1.029	2.16676	5.64535	0.347801	0.400793	0.889012	0.591729	0.233993	15.02	1.61	0.415279	0.229203	0.4251	1.15236	0.722988	0.176367
150	2018	0	Anhui	0	1	0	0	1	1.10743	2.51794	5.64823	0.332813	0.432513	0.903762	0.71688	0.246284	15.1333	1.6	0.437847	0.313916	0.8055	1.29957	0.705113	0.182784
150	2019	1	Anhui	0	1	0	0	1	1.19118	2.65216	5.6511	0.244669	0.545466	0.812472	0.678557	0.218539	15.234	1.59	0.466819	0.327425	0.7976	2.2294	0.857749	0.272696
150	2020	1	Anhui	0	1	0	0	1	1.26066	2.71169	5.57985	0.234658	0.547552	0.920055	0.822506	0.205519	15.3238	1.58	0.485984	0.423309	0.5782	2.3334	0.928115	0.217254
151	2013	0	Anhui	0	1	0	0	1	0.7451	1.5581	5.39568	0.38545	0.265401	0.572844	0.393743	0.213846	13.6635	1.68	0.286963	0.193804	0.135	0.68855	0.906018	0.200835
151	2014	0	Anhui	0	1	0	0	1	0.78237	1.61267	5.4055	0.389297	0.268885	0.602817	0.396919	0.21095	13.8978	1.68	0.295251	0.199253	0.207	0.690694	0.87804	0.202755
151	2015	0	Anhui	0	1	0	0	1	0.85045	1.74395	5.41522	0.353459	0.32422	0.653432	0.457753	0.218092	14.1634	1.77	0.302178	0.273204	0.28	0.917278	0.911907	0.212752
151	2016	0	Anhui	0	1	0	0	1	0.90676	1.93907	5.42963	0.323119	0.393918	0.696724	0.515403	0.243159	14.3367	1.81	0.309432	0.280003	0.3653	1.21911	0.875723	0.276055
151	2017	0	Anhui	0	1	0	0	1	0.98081	2.07216	5.44147	0.327947	0.420458	0.730581	0.640375	0.250402	14.5605	1.58	0.319529	0.331503	0.3593	1.28209	0.767182	0.195095
151	2018	0	Anhui	0	1	0	0	1	1.05943	2.5172	5.44383	0.305203	0.455259	0.770925	0.781904	0.272512	14.7842	1.34	0.33063	0.360649	0.3593	1.49166	0.784876	0.189694
151	2019	1	Anhui	0	1	0	0	1	1.14104	2.67107	5.44735	0.300067	0.482903	0.70398	0.759019	0.243155	15.0079	1.2	0.347499	0.365763	0.35	1.60932	0.723273	0.192316
151	2020	1	Anhui	0	1	0	0	1	1.20528	2.72673	5.33467	0.291555	0.484856	0.782399	0.914389	0.236511	15.2315	1.12	0.364242	0.37852	0.3115	1.663	0.766883	0.205368
152	2013	0	Anhui	0	1	0	0	1	0.8038	2.3581	5.4721	0.464642	0.302447	0.58321	0.429723	0.180019	14.2715	0.28	0.12245	0.184336	0.0831	0.650925	0.317605	0.311833
152	2014	0	Anhui	0	1	0	0	1	0.88532	2.37369	5.47961	0.448045	0.321894	0.607494	0.472851	0.179992	14.4725	0.29	0.120718	0.255588	0.092	0.718442	0.3197	0.314734
152	2015	0	Anhui	0	1	0	0	1	0.9624	2.5223	5.48717	0.4247	0.349185	0.657519	0.516922	0.196172	14.545	0.3	0.121542	0.267252	0.0973	0.822191	0.339226	0.278326
152	2016	0	Anhui	0	1	0	0	1	1.02219	2.68657	5.49536	0.41136	0.365124	0.705958	0.556027	0.200771	14.6658	0.29	0.122717	0.282266	0.1001	0.887601	0.345489	0.269626
152	2017	0	Anhui	0	1	0	0	1	1.10116	2.87301	5.50535	0.399598	0.389553	0.736779	0.605651	0.204691	14.7916	0.29	0.123202	0.294263	0.1055	0.974861	0.334449	0.264798
152	2018	0	Anhui	0	1	0	0	1	1.19187	3.05556	5.51525	0.389689	0.41454	0.767365	0.643509	0.213628	14.9121	0.29	0.125828	0.269816	0.1032	1.06377	0.332795	0.245335
152	2019	1	Anhui	0	1	0	0	1	1.28193	3.24928	5.52504	0.335905	0.444809	0.832324	0.690286	0.222448	15.0274	0.29	0.128107	0.245568	0.1011	1.32421	0.415328	0.246681
152	2020	1	Anhui	0	1	0	0	1	1.35786	3.34245	5.52537	0.325173	0.440462	0.905222	0.760194	0.225051	15.1378	0.3	0.13017	0.274062	0.113	1.35455	0.457069	0.227324
153	2013	0	Anhui	0	1	0	0	1	0.7526	1.6889	5.83628	0.525448	0.264354	0.646187	0.531238	0.228648	14.9295	1.61	0.469805	0.279495	0.7042	0.503102	0.399947	0.450786
153	2014	0	Anhui	0	1	0	0	1	0.77775	1.83875	5.84182	0.528405	0.266722	0.681024	0.562466	0.217041	14.8843	1.51	0.423291	0.244103	0.6934	0.504767	0.387802	0.432368
153	2015	0	Anhui	0	1	0	0	1	0.83695	1.94879	5.84733	0.490872	0.295347	0.81077	0.623019	0.232537	14.5871	1.61	0.416382	0.255709	0.6825	0.601677	0.435421	0.316807
153	2016	0	Anhui	0	1	0	0	1	0.89053	2.08143	5.77576	0.424541	0.3604	0.838285	0.665916	0.251886	14.4477	1.65	0.39621	0.274725	0.8446	0.848916	0.506678	0.308755
153	2017	0	Anhui	0	1	0	0	1	0.95845	2.23004	5.7808	0.421493	0.367931	0.847435	0.798367	0.236805	14.325	1.67	0.40467	0.28542	0.7996	0.872923	0.499595	0.352492
153	2018	0	Anhui	0	1	0	0	1	1.03261	2.37791	5.78582	0.346632	0.426429	0.990782	0.980952	0.275263	14.2239	1.65	0.414441	0.315699	0.005	1.23021	0.654744	0.234426
153	2019	0	Anhui	0	1	0	0	1	1.11646	2.51821	5.79165	0.241472	0.496374	1.22287	1.22015	0.367925	14.1405	1.67	0.421494	0.352641	1.1894	2.05562	1.08565	0.363386
153	2020	1	Anhui	0	1	0	0	1	1.18481	2.58667	5.5486	0.243104	0.482604	1.38812	1.41876	0.410915	14.0719	1.65	0.420153	0.489252	0.6749	1.98518	1.12829	0.205237
154	2013	0	Anhui	0	1	0	0	1	0.7605	1.8411	5.32281	0.474527	0.317347	1.01584	0.87298	0.217446	14.4505	0.78	0.248853	0.148091	0.3914	0.668766	0.438447	0.246866
154	2014	0	Anhui	0	1	0	0	1	0.82774	1.94476	5.32942	0.478232	0.317194	1.12589	0.923708	0.218238	14.53	0.8	0.232	0.181557	0.4514	0.663264	0.427633	0.405748
154	2015	0	Anhui	0	1	0	0	1	0.89651	2.07939	5.33598	0.463256	0.347127	1.26421	0.965654	0.240848	14.6323	0.83	0.213817	0.191981	0.4514	0.749319	0.409314	0.392901
154	2016	0	Anhui	0	1	0	0	1	0.9566	2.19438	5.3399	0.449658	0.377824	1.31085	1.00688	0.247606	14.7831	0.85	0.20396	0.180571	0.5756	0.840247	0.383664	0.387387
154	2017	0	Anhui	0	1	0	0	1	1.02957	2.34455	5.3412	0.462077	0.382446	1.31203	1.15345	0.235607	14.9026	0.86	0.191791	0.201643	0.5986	0.827667	0.336587	0.462593
154	2018	0	Anhui	0	1	0	0	1	1.10937	2.50915	5.3464	0.417931	0.426676	1.40428	1.23458	0.255928	15.009	0.89	0.200991	0.232688	0.5896	1.02092	0.371841	0.308086
154	2019	1	Anhui	0	1	0	0	1	1.19433	2.67431	5.35414	0.452886	0.436111	1.06189	0.983607	0.189554	15.1036	0.93	0.201196	0.216901	0.4594	0.962959	0.245103	0.451504
154	2020	1	Anhui	0	1	0	0	1	1.26748	2.74703	5.2442	0.455881	0.425631	1.19271	1.17012	0.207579	15.1878	0.96	0.201962	0.177169	0.61	0.933647	0.259909	0.315389
155	2013	0	Anhui	0	1	0	0	1	0.7146	2.1275	4.94158	0.416542	0.369511	0.954905	0.803896	0.379316	13.8217	0.42	0.213477	0.232136	0.323	0.887092	0.513327	0.1421
155	2014	0	Anhui	0	1	0	0	1	0.76397	1.81405	4.95124	0.399473	0.383667	1.11236	1.03222	0.413808	13.8533	0.42	0.198646	0.158243	0.3643	0.960432	0.542866	0.157913
155	2015	0	Anhui	0	1	0	0	1	0.82626	1.93393	4.96081	0.389708	0.404684	1.23856	1.12083	0.469898	13.785	0.46	0.187145	0.154244	0.3693	1.03843	0.527593	0.175342
155	2016	0	Anhui	0	1	0	0	1	0.88499	2.04839	4.9684	0.387932	0.409696	1.31693	1.37921	0.444326	13.3725	0.46	0.183277	0.164887	0.3713	1.0561	0.52167	0.192739
155	2017	0	Anhui	0	1	0	0	1	0.95242	2.17836	4.97218	0.406522	0.411432	1.39092	1.65123	0.423562	13.1678	0.46	0.18283	0.202012	0.3713	1.01208	0.447584	0.199507
155	2018	0	Anhui	0	1	0	0	1	1.02632	2.32825	4.98155	0.359434	0.474735	1.44623	1.83191	0.468743	12.9962	0.46	0.182035	0.16237	0.58	1.32079	0.46142	0.214862
155	2019	0	Anhui	0	1	0	0	1	1.11187	2.47023	4.99083	0.430395	0.458608	0.999185	1.30759	0.355367	12.8523	0.46	0.182459	0.20736	0.5811	1.06555	0.257896	0.342051
155	2020	1	Anhui	0	1	0	0	1	1.18315	2.53742	4.90399	0.430611	0.440866	1.09148	1.57824	0.328469	12.7317	0.47	0.18308	0.214579	0.5836	1.02382	0.298464	0.247758
156	2013	0	Anhui	0	1	0	0	1	0.5824	1.9581	5.76217	0.279975	0.401128	0.984084	0.45264	0.302259	13.6876	1.8	0.522556	0.232783	0.5235	1.43273	1.13877	0.261262
156	2014	0	Anhui	0	1	0	0	1	0.82085	2.10479	5.76217	0.283659	0.411006	1.06488	0.530341	0.300265	13.839	1.87	0.543582	0.247934	0.6275	1.44894	1.07619	0.294115
156	2015	0	Anhui	0	1	0	0	1	0.87523	2.2062	5.77068	0.275965	0.469014	1.08707	0.650448	0.367613	13.9572	1.96	0.565666	0.277612	0.5592	1.69954	0.923895	0.240034
156	2016	0	Anhui	0	1	0	0	1	0.93559	2.34772	5.77068	0.276123	0.481685	1.10117	0.806881	0.282659	14.1337	2.25	0.590879	0.30111	0.5849	1.74446	0.877302	0.315808
156	2017	0	Anhui	0	1	0	0	1	1.01297	2.5163	5.77912	0.305296	0.475473	1.1136	0.884947	0.297155	14.2653	2.26	0.612063	0.323197	0.5118	1.55742	0.718246	0.313057
156	2018	0	Anhui	0	1	0	0	1	1.09393	1.76464	5.77912	0.288988	0.497395	1.17288	1.0342	0.293577	14.3792	2.42	0.619519	0.350202	0.806	1.72116	0.739259	0.199001
156	2019	1	Anhui	0	1	0	0	1	1.17768	2.85877	5.77912	0.300959	0.53755	0.958774	0.878129	0.221915	14.4778	2.58	0.622432	0.347032	0.8192	1.78612	0.536586	0.344659
156	2020	1	Anhui	0	1	0	0	1	1.2429	2.92323	5.77912	0.296256	0.543074	1.08348	1.05811	0.203642	14.5631	2.76	0.627132	0.403209	0.816	1.83313	0.542336	0.23557
157	2013	0	Anhui	0	1	0	0	1	0.5053	1.8581	3.24071	0.421369	0.383063	1.22249	0.766608	0.460303	11.8615	0.13	0.027608	0.024121	0.1031	0.909093	0.464113	0.16293
157	2014	0	Anhui	0	1	0	0	1	0.72932	1.93836	3.25129	0.410307	0.39915	1.31953	0.874586	0.456295	11.8865	0.12	0.025643	0.030271	0.1141	0.972807	0.464404	0.220725
157	2015	0	Anhui	0	1	0	0	1	0.78554	2.08095	3.26176	0.369686	0.452386	1.36611	0.936485	0.452848	11.6941	0.13	0.024004	0.02956	0.1141	1.22371	0.481295	0.220472
157	2016	0	Anhui	0	1	0	0	1	0.83629	2.20727	3.26176	0.355297	0.472262	1.37078	0.983019	0.466971	11.6941	0.13	0.022417	0.025908	0.1061	1.3292	0.485344	0.217076
157	2017	0	Anhui	0	1	0	0	1	0.90007	2.35369	3.27213	0.347793	0.484726	1.36907	1.02542	0.447769	11.6909	0.13	0.021378	0.034346	0.1051	1.39372	0.481554	0.22337
157	2018	0	Anhui	0	1	0	0	1	0.97231	2.50749	3.29253	0.267752	0.561039	1.48748	1.21575	0.500332	11.6879	0.13	0.020839	0.039441	0.1051	2.09537	0.639264	0.138067
157	2019	0	Anhui	0	1	0	0	1	1.04391	2.66288	3.30259	0.232856	0.597556	1.61121	1.27243	0.576289	11.685	0.14	0.020253	0.045378	0.1186	2.5662	0.728295	0.186134
157	2020	1	Anhui	0	1	0	0	1	1.09461	2.71589	3.09186	0.221696	0.59569	1.85005	1.44731	0.562553	11.6822	0.14	0.019614	0.045547	0.1237	2.68697	0.823713	0.141694
158	2013	0	Jiangxi	0	1	0	0	1	0.5376	1.6676	4.29584	0.477717	0.365862	0.874162	0.487596	0.289318	13.6236	0.2	0.098679	0.054461	0.1314	0.765855	0.327433	0.468491
158	2014	0	Jiangxi	0	1	0	0	1	0.66946	1.78743	4.3322	0.474442	0.37307	0.942334	0.543527	0.287033	13.6857	0.19	0.099874	0.0549	0.1357	0.786333	0.321406	0.475682
158	2015	0	Jiangxi	0	1	0	0	1	0.73611	1.91125	4.3322	0.456456	0.388925	1.02042	0.599235	0.348302	13.7148	0.2	0.103562	0.070525	0.1413	0.852055	0.338738	0.336981
158	2016	0	Jiangxi	0	1	0	0	1	0.80449	2.02822	4.34357	0.423781	0.419685	1.07433	0.568726	0.349854	13.722	0.14	0.104797	0.066774	0.1238	0.990334	0.376949	0.309501
158	2017	0	Jiangxi	0	1	0	0	1	0.88816	2.14774	4.35515	0.387261	0.457333	1.1538	0.830678	0.363383	13.7295	0.14	0.106381	0.080098	0.1235	1.18094	0.401295	0.27102
158	2018	0	Jiangxi	0	1	0	0	1	0.96771	2.27387	4.36661	0.359929	0.461118	1.24298	0.966428	0.075642	13.736	0.13	0.109314	0.089349	0.1065	1.28114	0.497191	0.635928
158	2019	1	Jiangxi	0	1	0	0	1	1.03923	2.38602	4.37827	0.276499	0.556274	1.47064	1.17792	0.440716	13.7415	0.133	0.109493	0.093612	0.118	2.01185	0.604804	0.229627
158	2020	1	Jiangxi	0	1	0	0	1	1.10919	2.49515	4.3898	0.299379	0.528312	1.60122	1.48428	0.447252	13.7461	0.1346	0.1088	0.092664	0.11	1.76469	0.575552	0.215392
159	2013	0	Jiangxi	0	1	0	0	1	0.5126	1.8317	5.31615	0.508894	0.343974	0.735834	0.55223	0.305017	14.5871	0.2	0.295704	0.160857	0.43	0.675924	0.289122	0.548763
159	2014	0	Jiangxi	0	1	0	0	1	0.65391	1.97327	5.31882	0.506857	0.356986	0.720695	0.609725	0.315695	14.9571	0.19	0.31335	0.219162	0.4439	0.704314	0.26863	0.545699
159	2015	0	Jiangxi	0	1	0	0	1	0.73178	2.14016	5.32281	0.48906	0.377346	0.767859	0.706478	0.349866	14.95	0.22	0.329435	0.22073	0.4464	0.771574	0.273164	0.508475
159	2016	0	Jiangxi	0	1	0	0	1	0.79948	2.28284	5.32546	0.478785	0.390491	0.780647	0.805253	0.325104	15.1108	0.24	0.338138	0.201032	0.4486	0.815588	0.280286	0.460731
159	2017	0	Jiangxi	0	1	0	0	1	0.87186	2.43231	5.33073	0.481931	0.386666	0.757025	0.784719	0.305546	15.2851	0.249	0.334999	0.27438	0.4593	0.802326	0.27266	0.464932
159	2018	0	Jiangxi	0	1	0	0	1	0.94649	2.59046	5.33467	0.485277	0.406	0.708612	0.944245	0.27678	15.4535	0.25	0.30596	0.270895	0.462	0.836637	0.224044	0.453119
159	2019	0	Jiangxi	0	1	0	0	1	1.01966	2.72576	5.33729	0.41477	0.481709	0.672824	0.871115	0.274784	15.6163	0.251	0.309796	0.271603	0.482	1.16139	0.249586	0.384052
159	2020	1	Jiangxi	0	1	0	0	1	1.09858	2.8588	5.29592	0.394161	0.491	0.738878	0.944188	0.272798	15.7737	0.2546	0.303886	0.306302	0.405	1.24568	0.291351	0.383309
160	2013	0	Jiangxi	0	1	0	0	1	0.629	1.9301	5.41884	0.526012	0.307241	1.0968	1.01939	0.245396	14.6354	0.28	0.400225	0.269312	0.22	0.584094	0.317003	0.401074
160	2014	0	Jiangxi	0	1	0	0	1	0.71149	2.11571	5.45435	0.532438	0.317287	1.20376	1.28608	0.25059	14.8044	0.29	0.409148	0.280571	0.36	0.595913	0.282239	0.462064
160	2015	0	Jiangxi	0	1	0	0	1	0.79322	2.27999	5.45435	0.50913	0.353621	1.11706	1.20434	0.231598	14.9218	0.3	0.417799	0.315177	0.1809	0.694558	0.269576	0.467404
160	2016	0	Jiangxi	0	1	0	0	1	0.86569	2.42914	5.45435	0.496987	0.367543	1.46657	1.48073	0.255554	14.9932	0.31	0.39933	0.344715	0.1851	0.739543	0.281624	0.391299
160	2017	0	Jiangxi	0	1	0	0	1	0.94131	2.59603	5.45435	0.512391	0.37066	1.49722	1.57304	0.274358	15.1599	0.25	0.406347	0.362668	0.1968	0.723393	0.228243	0.327289
160	2018	0	Jiangxi	0	1	0	0	1	1.02548	2.778	5.45435	0.516105	0.381836	1.4497	1.67071	0.292026	15.3243	0.26	0.435303	0.377068	0.2078	0.739842	0.19775	0.305871
160	2019	1	Jiangxi	0	1	0	0	1	1.09796	2.94311	5.45435	0.435242	0.495538	1.15053	1.48766	0.236351	15.4864	0.2645	0.433801	0.373643	0.204	1.13853	0.159039	0.291614
160	2020	1	Jiangxi	0	1	0	0	1	1.17982	3.09893	5.48692	0.41926	0.508074	1.2264	1.71045	0.211168	15.6462	0.2649	0.445592	0.354967	0.2133	1.21183	0.17332	0.320326
161	2013	0	Jiangxi	0	1	0	0	1	0.5359	1.8563	5.00186	0.579645	0.255999	0.785538	0.657982	0.234559	14.7224	0.2	0.279797	0.143448	0.155	0.441647	0.283546	0.365321
161	2014	0	Jiangxi	0	1	0	0	1	0.67337	2.00123	5.00948	0.587593	0.26176	0.820461	0.707808	0.251875	14.8032	0.21	0.287421	0.160007	0.27	0.445478	0.25638	0.446368
161	2015	0	Jiangxi	0	1	0	0	1	0.74603	2.16847	5.01703	0.567452	0.282941	0.886661	0.811802	0.270532	14.8879	0.22	0.292849	0.174984	0.28	0.498617	0.263648	0.484687
161	2016	0	Jiangxi	0	1	0	0	1	0.8111	2.30749	5.02453	0.557658	0.294021	0.943554	0.990202	0.281396	15.0649	0.21	0.296327	0.178094	0.28	0.527241	0.275518	0.5173
161	2017	0	Jiangxi	0	1	0	0	1	0.88362	2.4763	5.03197	0.565813	0.295756	1.03647	1.09682	0.269525	15.2317	0.22	0.300198	0.183244	0.0851	0.522711	0.244658	0.339299
161	2018	0	Jiangxi	0	1	0	0	1	0.95638	2.64233	5.03936	0.57663	0.310304	1.02382	1.0894	0.284141	15.3679	0.223	0.300737	0.183638	0.1525	0.538134	0.19608	0.295959
161	2019	0	Jiangxi	0	1	0	0	1	1.03641	2.78263	5.04669	0.321885	0.564321	1.08399	1.24611	0.340488	15.4791	0.224	0.247584	0.198754	0.1566	1.75317	0.353524	0.256151
161	2020	1	Jiangxi	0	1	0	0	1	1.11014	2.93885	5.05404	0.307552	0.57355	1.15392	1.36383	0.296783	15.57	0.2243	0.294312	0.224953	0.1569	1.86489	0.386595	0.288474
162	2013	0	Jiangxi	0	1	0	0	1	0.5311	1.7327	4.43399	0.403082	0.378135	0.995332	0.915408	0.378154	13.217	0.1	0.122496	0.059652	0.14	0.93811	0.542774	0.251957
162	2014	0	Jiangxi	0	1	0	0	1	0.66819	1.85479	4.46574	0.40601	0.388461	1.01399	1.00697	0.370122	13.353	0.11	0.127087	0.085582	0.269	0.956778	0.506217	0.322847
162	2015	0	Jiangxi	0	1	0	0	1	0.73515	1.98791	4.46574	0.391803	0.409486	1.05554	1.17233	0.408339	13.4024	0.11	0.130061	0.095221	0.269	1.04513	0.507171	0.302062
162	2016	0	Jiangxi	0	1	0	0	1	0.80222	2.10972	4.47197	0.377593	0.426076	1.10355	1.38816	0.411877	13.4803	0.12	0.135584	0.102102	0.269	1.1284	0.529742	0.256058
162	2017	0	Jiangxi	0	1	0	0	1	0.87112	2.25886	4.47816	0.381036	0.432731	1.12195	1.43701	0.394957	13.5575	0.121	0.138183	0.11251	0.0866	1.13567	0.488755	0.235136
162	2018	0	Jiangxi	0	1	0	0	1	0.94368	2.39965	4.48401	0.388338	0.448667	1.13323	1.44224	0.397551	13.6276	0.122	0.142747	0.119474	0.0667	1.15535	0.419724	0.225282
162	2019	1	Jiangxi	0	1	0	0	1	1.01207	2.52436	4.48982	0.375449	0.468072	1.04242	1.44862	0.398431	13.6912	0.124	0.145946	0.120064	0.0446	1.2467	0.416777	0.195877
162	2020	1	Jiangxi	0	1	0	0	1	1.07863	2.66319	4.49529	0.36724	0.468227	1.10599	1.59873	0.351415	13.7489	0.1248	0.145454	0.131056	0.162	1.27499	0.448026	0.222571
163	2013	0	Jiangxi	0	1	0	0	1	0.5306	1.6415	4.63759	0.244157	0.443037	0.856896	0.744418	0.381912	12.3437	0.1	0.171086	0.088108	0.22	1.81456	1.28117	0.221165
163	2014	0	Jiangxi	0	1	0	0	1	0.6589	1.76788	4.66356	0.243637	0.461359	0.913254	0.866154	0.386066	12.4507	0.11	0.167029	0.078214	0.2198	1.89363	1.21084	0.243013
163	2015	0	Jiangxi	0	1	0	0	1	0.72581	1.89469	4.66356	0.230519	0.485139	1.20944	1.07513	0.455725	12.577	0.116	0.178704	0.121029	0.28	2.10455	1.23334	0.22343
163	2016	0	Jiangxi	0	1	0	0	1	0.7906	2.00706	4.67275	0.220761	0.499871	1.1404	1.05622	0.436822	12.7051	0.118	0.178728	0.137499	0.28	2.2643	1.31138	0.201883
163	2017	0	Jiangxi	0	1	0	0	1	0.85445	2.14015	4.68185	0.22285	0.514847	1.09695	1.21196	0.424411	12.816	0.119	0.170512	0.157331	0.0906	2.31029	1.17704	0.185235
163	2018	0	Jiangxi	0	1	0	0	1	0.93842	2.27668	4.69088	0.225368	0.535326	1.10346	1.46059	0.451841	12.9197	0.12	0.150381	0.132762	0.0822	2.37534	1.06185	0.172334
163	2019	1	Jiangxi	0	1	0	0	1	1.00352	2.37367	4.69957	0.255807	0.51948	1.05726	1.49463	0.439116	13.0167	0.124	0.194615	0.133368	0.0852	2.03075	0.878449	0.257324
163	2020	1	Jiangxi	0	1	0	0	1	1.0681	2.45474	4.70844	0.247877	0.516671	1.1491	1.71002	0.386733	13.1074	0.1245	0.195556	0.157237	0.0876	2.08439	0.949871	0.186003
164	2013	0	Jiangxi	0	1	0	0	1	0.5112	1.6325	5.38203	0.402183	0.361163	0.971772	0.697103	0.269249	13.5948	0.29	0.345825	0.126484	0.3	0.898007	0.588425	0.198436
164	2014	0	Jiangxi	0	1	0	0	1	0.66281	1.72731	5.40672	0.404588	0.372885	1.02833	0.778407	0.249844	13.7094	0.32	0.355769	0.134344	0.33	0.921641	0.550011	0.223652
164	2015	0	Jiangxi	0	1	0	0	1	0.74102	1.84789	5.43082	0.400611	0.374358	1.17082	0.832305	0.282393	13.7976	0.34	0.353516	0.140806	0.345	0.934467	0.549341	0.203719
164	2016	0	Jiangxi	0	1	0	0	1	0.81308	1.96305	5.44406	0.396759	0.382086	1.22949	0.897154	0.305519	13.875	0.37	0.362947	0.149756	0.3607	0.963018	0.571061	0.239633
164	2017	0	Jiangxi	0	1	0	0	1	0.88519	2.10125	5.45725	0.406314	0.389643	1.22537	0.911075	0.271197	13.9545	0.36	0.376182	0.153086	0.3615	0.958971	0.502182	0.178051
164	2018	0	Jiangxi	0	1	0	0	1	0.95357	2.23805	5.47038	0.412431	0.402811	1.27627	0.978403	0.277072	14.0264	0.361	0.37628	0.195028	0.3822	0.976675	0.447971	0.16297
164	2019	0	Jiangxi	0	1	0	0	1	1.02442	2.33946	5.48323	0.281973	0.521492	1.22968	0.948882	0.290419	14.0916	0.362	0.376982	0.203015	0.3822	1.84944	0.696998	0.145805
164	2020	1	Jiangxi	0	1	0	0	1	1.0925	2.42983	5.49614	0.269304	0.523457	1.31263	0.992805	0.267732	14.1507	0.3649	0.371724	0.209662	0.3162	1.94374	0.769536	0.153298
165	2013	0	Jiangxi	0	1	0	0	1	0.5313	1.8357	5.65396	0.512577	0.330387	0.905687	0.51222	0.242791	14.4951	0.22	0.562944	0.210662	0.27	0.64456	0.306365	0.255999
165	2014	0	Jiangxi	0	1	0	0	1	0.67239	1.99018	5.69135	0.520791	0.333658	0.960231	0.586817	0.245085	14.6228	0.24	0.546574	0.248722	0.37	0.640677	0.279481	0.286667
165	2015	0	Jiangxi	0	1	0	0	1	0.75711	2.15846	5.70048	0.500142	0.359025	1.04849	0.686236	0.262572	14.6855	0.25	0.529977	0.255386	0.3986	0.717847	0.281586	0.296184
165	2016	0	Jiangxi	0	1	0	0	1	0.83103	2.29181	5.71761	0.482917	0.375295	1.09163	0.763688	0.26204	14.798	0.2	0.5191	0.294155	0.3986	0.777142	0.300298	0.352006
165	2017	0	Jiangxi	0	1	0	0	1	0.90686	2.45518	5.73471	0.483122	0.384053	1.09926	0.831302	0.26522	14.8873	0.21	0.512102	0.27497	0.2049	0.794939	0.27493	0.344563
165	2018	0	Jiangxi	0	1	0	0	1	0.97715	2.61857	5.75178	0.49055	0.396043	1.09744	0.944613	0.273007	14.9664	0.21	0.512501	0.305291	0.2033	0.807345	0.231184	0.216064
165	2019	0	Jiangxi	0	1	0	0	1	1.05193	2.76632	5.76882	0.397159	0.493083	1.06774	0.973881	0.275918	15.0365	0.2006	0.501828	0.315239	0.3144	1.24152	0.276357	0.200736
165	2020	1	Jiangxi	0	1	0	0	1	1.12126	2.93611	5.78591	0.381528	0.503181	1.14471	1.15121	0.269343	15.0985	0.2042	0.493186	0.380196	0.3144	1.31886	0.302181	0.189138
166	2013	0	Jiangxi	0	1	0	0	1	0.5378	1.8337	5.39445	0.475907	0.285996	0.775411	0.591488	0.274731	14.1815	0.27	0.403384	0.134605	0.107	0.600951	0.500301	0.207333
166	2014	0	Jiangxi	0	1	0	0	1	0.66887	1.97708	5.41884	0.482132	0.294243	0.855637	0.59629	0.256927	14.3279	0.29	0.398965	0.142059	0.34	0.610295	0.463826	0.257882
166	2015	0	Jiangxi	0	1	0	0	1	0.75585	2.1209	5.43082	0.468213	0.310438	0.982687	0.693392	0.285008	14.4555	0.32	0.403134	0.159442	0.34	0.663027	0.472754	0.218026
166	2016	0	Jiangxi	0	1	0	0	1	0.83055	2.2546	5.44277	0.461873	0.316333	1.05062	0.887766	0.285882	14.5134	0.32	0.408803	0.178766	0.34	0.684891	0.491522	0.187754
166	2017	0	Jiangxi	0	1	0	0	1	0.90093	2.41175	5.4533	0.481991	0.326528	1.12181	0.9445	0.28151	14.6248	0.28	0.415468	0.22678	0.2861	0.677457	0.39727	0.175733
166	2018	0	Jiangxi	0	1	0	0	1	0.97143	2.55482	5.46268	0.498352	0.347073	1.12186	0.925237	0.309472	14.7307	0.281	0.425486	0.259349	0.3678	0.696443	0.310173	0.157749
166	2019	0	Jiangxi	0	1	0	0	1	1.05008	2.66712	5.47107	0.318235	0.516609	1.15666	0.980636	0.340437	14.8315	0.282	0.431058	0.329752	0.226	1.62336	0.518974	0.13801
166	2020	1	Jiangxi	0	1	0	0	1	1.12332	2.77953	5.47847	0.305344	0.521274	1.22198	1.07106	0.302576	14.9273	0.2846	0.420513	0.370285	0.2252	1.70717	0.567824	0.150103
167	2013	0	Jiangxi	0	1	0	0	1	0.5074	1.8143	4.95124	0.425077	0.356132	0.81297	0.516695	0.307949	13.8001	0.1	0.254875	0.174847	0.15	0.837805	0.514707	0.30315
167	2014	0	Jiangxi	0	1	0	0	1	0.66398	1.91374	4.97029	0.427041	0.367269	0.870192	0.55942	0.311079	13.893	0.1	0.241137	0.181485	0.3	0.860033	0.481664	0.326449
167	2015	0	Jiangxi	0	1	0	0	1	0.74767	2.05667	4.97029	0.402893	0.399564	0.972776	0.686968	0.353705	13.9834	0.1	0.231802	0.209972	0.3	0.991738	0.490313	0.306724
167	2016	0	Jiangxi	0	1	0	0	1	0.82309	2.1833	4.9849	0.386394	0.419458	0.994638	0.783136	0.32564	14.1143	0.11	0.217761	0.213433	0.1658	1.08557	0.514573	0.304299
167	2017	0	Jiangxi	0	1	0	0	1	0.8901	2.33637	4.99948	0.393811	0.42026	0.991643	0.861994	0.322502	14.2258	0.09	0.214393	0.206825	0.2126	1.06716	0.472128	0.276535
167	2018	0	Jiangxi	0	1	0	0	1	0.97497	2.4596	5.01386	0.407341	0.419126	1.07656	1.10554	0.350257	14.3306	0.09	0.206849	0.198863	0.2368	1.02893	0.426015	0.244332
167	2019	1	Jiangxi	0	1	0	0	1	1.04302	2.58644	5.02838	0.362403	0.454991	1.05864	1.1959	0.383431	14.429	0.08	0.207168	0.212615	0.2374	1.25549	0.503875	0.20929
167	2020	1	Jiangxi	0	1	0	0	1	1.11339	2.71567	5.04288	0.350956	0.457023	1.14428	1.25608	0.355853	14.5214	0.084	0.206229	0.216115	0.2534	1.30222	0.547135	0.216449
168	2013	0	Jiangxi	0	1	0	0	1	0.5288	1.6621	4.43399	0.330727	0.405595	0.778228	0.771224	0.358865	12.7029	0.14	0.132027	0.041857	0.15	1.22638	0.79727	0.230492
168	2014	0	Jiangxi	0	1	0	0	1	0.65518	1.79633	4.49651	0.31437	0.38572	0.791192	0.778729	0.340566	12.8296	0.146	0.128578	0.051896	0.17	1.22696	0.954001	0.26543
168	2015	0	Jiangxi	0	1	0	0	1	0.73159	1.95526	4.49651	0.30418	0.401121	0.885716	0.857985	0.417124	12.9382	0.147	0.129163	0.077339	0.1076	1.3187	0.968835	0.212018
168	2016	0	Jiangxi	0	1	0	0	1	0.7975	2.08007	4.49195	0.297288	0.411736	0.866259	0.899951	0.38596	13.0639	0.148	0.127809	0.091713	0.2046	1.38497	1.00323	0.285595
168	2017	0	Jiangxi	0	1	0	0	1	0.87269	2.22877	4.49165	0.300662	0.399792	0.909427	0.997943	0.368561	13.3144	0.149	0.127031	0.09368	0.1074	1.32971	0.996285	0.187169
168	2018	0	Jiangxi	0	1	0	0	1	0.96118	2.37934	4.49165	0.307146	0.424389	0.453268	0.489434	0.409337	13.5648	0.15	0.135693	0.097543	0.073	1.38172	0.874065	0.176901
168	2019	1	Jiangxi	0	1	0	0	1	1.04681	2.51237	4.49165	0.312818	0.45978	0.767673	1.00363	0.394575	13.8152	0.154	0.127362	0.119653	0.1246	1.4698	0.726947	0.150273
168	2020	1	Jiangxi	0	1	0	0	1	1.1306	2.65035	4.49165	0.300373	0.461492	0.828244	1.15095	0.322355	14.0655	0.1543	0.125434	0.112542	0.1498	1.5364	0.792798	0.198112
169	2013	0	Jiangxi	0	1	0	0	1	0.4371	1.6231	4.46574	0.312741	0.378148	1.03977	1.19876	0.411813	11.9239	0.13	0.119686	0.098398	0.15	1.20914	0.988392	0.261987
169	2014	0	Jiangxi	0	1	0	0	1	0.56876	1.75019	4.49651	0.313931	0.39098	1.10492	1.31144	0.379317	12.1242	0.14	0.121538	0.102427	0.13	1.24543	0.939979	0.306267
169	2015	0	Jiangxi	0	1	0	0	1	0.64155	1.87919	4.49651	0.304328	0.406362	1.27477	1.50054	0.428763	12.3696	0.15	0.123083	0.104534	0.1478	1.33528	0.950654	0.269197
169	2016	0	Jiangxi	0	1	0	0	1	0.69871	1.991	4.4956	0.284114	0.428114	1.35939	1.76592	0.420053	12.4579	0.14	0.124154	0.106098	0.1426	1.50684	1.03663	0.256346
169	2017	0	Jiangxi	0	1	0	0	1	0.78111	2.12533	4.4956	0.292353	0.44899	1.43981	1.83108	0.406996	12.538	0.146	0.124512	0.111828	0.1426	1.53578	0.88474	0.228757
169	2018	0	Jiangxi	0	1	0	0	1	0.86814	2.27224	4.4956	0.292181	0.467544	1.47805	1.8374	0.453681	12.5993	0.15	0.126362	0.136029	0.2264	1.60019	0.82235	0.201423
169	2019	1	Jiangxi	0	1	0	0	1	0.94682	2.40965	4.4956	0.296545	0.497628	1.27772	1.43544	0.420659	12.6461	0.1546	0.125553	0.152061	0.1893	1.67809	0.694082	0.174996
169	2020	1	Jiangxi	0	1	0	0	1	1.02239	2.55627	4.4956	0.281568	0.503676	1.38182	1.66807	0.411967	12.6819	0.1549	0.124059	0.147368	0.2087	1.78883	0.762713	0.183057
170	2013	0	Jiangxi	0	1	0	0	1	0.6194	1.9039	5.21951	0.348894	0.487674	0.86446	0.74864	0.279837	13.5065	0.16	0.299621	0.12951	0.32	1.39777	0.468429	0.326952
170	2014	0	Jiangxi	0	1	0	0	1	0.69957	2.07152	5.23411	0.347864	0.49057	0.903006	0.848366	0.276242	13.7569	0.166	0.300774	0.146719	0.36	1.41024	0.464452	0.342188
170	2015	0	Jiangxi	0	1	0	0	1	0.79457	2.24464	5.2485	0.335668	0.509182	1.00101	0.940626	0.303373	13.9201	0.169	0.30344	0.165638	0.5135	1.51692	0.46221	0.316004
170	2016	0	Jiangxi	0	1	0	0	1	0.86994	2.38985	5.25929	0.32388	0.516369	1.08172	1.06499	0.321986	14.1431	0.17	0.305206	0.184022	0.5135	1.59432	0.50386	0.287635
170	2017	0	Jiangxi	0	1	0	0	1	0.9539	2.55556	5.27012	0.343449	0.503651	1.13761	1.33835	0.33534	14.3665	0.18	0.307483	0.205816	0.2541	1.46645	0.445187	0.247904
170	2018	1	Jiangxi	0	1	0	0	1	1.02974	2.7244	5.28096	0.337975	0.516445	1.16166	1.49657	0.344284	14.5898	0.1836	0.316044	0.227338	0.3095	1.52806	0.430739	0.239529
170	2019	1	Jiangxi	0	1	0	0	1	1.10307	2.87971	5.29169	0.374029	0.476079	1.25885	1.62872	0.402686	14.8131	0.184	0.308871	0.240978	0.3095	1.27284	0.400751	0.209749
170	2020	1	Jiangxi	0	1	0	0	1	1.17682	3.05253	5.30244	0.359842	0.483133	1.3504	1.77631	0.366081	15.0364	0.1849	0.303381	0.277725	0.3095	1.34262	0.436369	0.227332
171	2013	0	Jiangxi	0	1	0	0	1	0.6072	2.1095	4.91202	0.563297	0.243656	0.757964	0.425099	0.239515	14.6921	0.25	0.184021	0.112368	0.1261	0.432552	0.342709	0.524927
171	2014	0	Jiangxi	0	1	0	0	1	0.70719	2.28288	4.93183	0.562021	0.254645	0.795341	0.484056	0.233353	14.9281	0.84	0.191742	0.124289	0.1261	0.453088	0.326205	0.560331
171	2015	0	Jiangxi	0	1	0	0	1	0.79765	2.45121	4.95124	0.544825	0.269257	0.837375	0.535402	0.243633	15.0301	0.88	0.195671	0.133225	0.1261	0.494208	0.341244	0.727282
171	2016	0	Jiangxi	0	1	0	0	1	0.87995	2.59631	4.95355	0.514254	0.303201	0.871296	0.620268	0.241215	15.1601	0.86	0.197566	0.133937	0.1621	0.589595	0.354971	0.67004
171	2017	1	Jiangxi	0	1	0	0	1	0.95613	2.77476	4.9547	0.528469	0.308721	0.83888	0.629325	0.241237	15.2485	0.876	0.213212	0.142935	0.1109	0.584179	0.30808	0.426109
171	2018	1	Jiangxi	0	1	0	0	1	1.03482	2.94286	4.95527	0.503071	0.356444	0.900534	0.762423	0.238575	15.3161	0.872	0.223779	0.162068	0.1109	0.708536	0.279256	0.432345
171	2019	1	Jiangxi	0	1	0	0	1	1.10792	3.10747	4.95566	0.553749	0.314883	0.836532	0.895667	0.22024	15.3678	0.873	0.216244	0.173024	0.1211	0.568638	0.237233	0.42652
171	2020	1	Jiangxi	0	1	0	0	1	1.16835	3.27442	4.95585	0.542564	0.315068	1.02256	1.05808	0.226055	15.4073	0.874	0.223159	0.181868	0.1208	0.580702	0.262399	0.402695
172	2013	0	Jiangxi	0	1	0	0	1	0.5305	1.8032	5.06044	0.49832	0.331008	0.74844	0.503598	0.258504	14.0424	0.18	0.228469	0.110015	0.255	0.664248	0.342497	0.341856
172	2014	0	Jiangxi	0	1	0	0	1	0.66007	1.93769	5.11087	0.491487	0.355053	0.784871	0.566227	0.246583	14.3167	0.19	0.218883	0.119132	0.255	0.722405	0.312236	0.394724
172	2015	0	Jiangxi	0	1	0	0	1	0.73929	2.08912	5.11087	0.479989	0.369794	0.845158	0.644511	0.284608	14.3581	0.2	0.250212	0.141898	0.255	0.770423	0.312959	0.367579
172	2016	0	Jiangxi	0	1	0	0	1	0.8094	2.21484	5.12196	0.462322	0.372591	0.890886	0.747852	0.293284	14.5612	0.136	0.261276	0.169893	0.255	0.805912	0.357082	0.308989
172	2017	0	Jiangxi	0	1	0	0	1	0.88028	2.36712	5.13308	0.490027	0.391844	0.921198	0.917606	0.317745	14.7186	0.138	0.271963	0.196875	0.1682	0.799639	0.241066	0.252842
172	2018	0	Jiangxi	0	1	0	0	1	0.96563	2.50585	5.14409	0.455502	0.435569	1.00073	1.06495	0.34929	14.8644	0.14	0.283769	0.223897	0.1682	0.956241	0.239141	0.237583
172	2019	1	Jiangxi	0	1	0	0	1	1.04082	2.6307	5.15513	0.429455	0.482171	0.910064	0.991185	0.326398	14.9993	0.144	0.264012	0.222649	0.1449	1.12275	0.205782	0.208319
172	2020	1	Jiangxi	0	1	0	0	1	1.11339	2.78484	5.1662	0.421961	0.485279	0.995727	1.0878	0.295716	15.1243	0.1448	0.249493	0.223227	0.1468	1.15006	0.219831	0.215448
173	2013	0	Jiangxi	0	1	0	0	1	0.518	1.7507	4.43399	0.47525	0.304444	0.995853	0.566279	0.309052	13.6014	0.13	0.107472	0.063041	0.1986	0.640597	0.463559	0.367151
173	2014	0	Jiangxi	0	1	0	0	1	0.65997	1.88265	4.46574	0.479496	0.313978	1.02188	0.592978	0.320616	13.8258	0.25	0.120887	0.06377	0.1986	0.654808	0.430715	0.369343
173	2015	0	Jiangxi	0	1	0	0	1	0.73659	2.02142	4.46574	0.467337	0.328259	1.11199	0.655611	0.381482	13.9294	0.26	0.111611	0.074823	0.1959	0.702404	0.43738	0.325439
173	2016	0	Jiangxi	0	1	0	0	1	0.80184	2.1391	4.46761	0.431024	0.340385	1.14962	0.797642	0.346938	14.0291	0.3	0.11485	0.079409	0.1959	0.789711	0.530344	0.325439
173	2017	0	Jiangxi	0	1	0	0	1	0.88251	2.29035	4.46823	0.453821	0.353237	1.16652	0.926573	0.372615	14.0995	0.27	0.119051	0.089181	0.1818	0.778361	0.425151	0.265273
173	2018	1	Jiangxi	0	1	0	0	1	0.95992	2.44037	4.46854	0.398976	0.444141	1.22206	1.10347	0.400092	14.148	0.2835	0.120952	0.109213	0.0785	1.1132	0.393214	0.26071
173	2019	1	Jiangxi	0	1	0	0	1	1.03253	2.57304	4.46886	0.350167	0.508922	1.21759	1.14077	0.425912	14.1815	0.2836	0.123787	0.111416	0.1043	1.45337	0.402411	0.220147
173	2020	1	Jiangxi	0	1	0	0	1	1.10363	2.71019	4.46886	0.343283	0.510665	1.34817	1.35997	0.42056	14.2045	0.284	0.138141	0.126246	0.1445	1.48759	0.425455	0.215589
174	2013	0	Jiangxi	0	1	0	0	1	0.5125	1.6337	4.95124	0.46893	0.317385	1.13207	0.423666	0.284062	13.9944	0.17	0.194098	0.130909	0.2409	0.676828	0.455686	0.275111
174	2014	0	Jiangxi	0	1	0	0	1	0.65176	1.75361	4.97029	0.471356	0.328211	1.17283	0.49808	0.284575	14.1791	0.16	0.1923	0.138665	0.2509	0.696312	0.425227	0.285048
174	2015	0	Jiangxi	0	1	0	0	1	0.73062	1.87948	4.97029	0.453782	0.345473	1.2502	0.559993	0.289588	14.2117	0.17	0.197614	0.158459	0.2509	0.761319	0.442381	0.293635
174	2016	0	Jiangxi	0	1	0	0	1	0.79636	1.98704	4.97987	0.419482	0.364371	1.27966	0.588586	0.306996	14.2951	0.18	0.199314	0.165332	0.201	0.868621	0.515272	0.25872
174	2017	0	Jiangxi	0	1	0	0	1	0.87538	2.12366	4.98917	0.442606	0.38086	1.2802	0.647574	0.30975	14.362	0.2	0.204138	0.166895	0.1791	0.860495	0.398851	0.218913
174	2018	1	Jiangxi	0	1	0	0	1	0.9484	2.25229	4.99875	0.313351	0.546824	1.32075	0.731727	0.308136	14.4207	0.204	0.210684	0.176453	0.1791	1.74508	0.446227	0.209826
174	2019	1	Jiangxi	0	1	0	0	1	1.02407	2.36292	5.00806	0.256951	0.595405	1.54397	0.912803	0.342882	14.4722	0.2042	0.203969	0.181646	0.004	2.31719	0.5746	0.203743
174	2020	1	Jiangxi	0	1	0	0	1	1.09575	2.4788	5.01746	0.250945	0.594586	1.64891	1.03864	0.350346	14.5175	0.207	0.201417	0.184321	0.1024	2.36939	0.615548	0.188454
175	2013	0	Jiangxi	0	1	0	0	1	0.5174	2.2643	3.77259	0.362131	0.54201	0.779163	0.792279	0.298869	12.5111	0.04	0.058089	0.047406	0.055	1.49672	0.264708	0.356573
175	2014	0	Jiangxi	0	1	0	0	1	0.66467	2.42385	3.83321	0.359627	0.555461	0.866229	0.946153	0.287491	12.6684	0.04	0.059441	0.046003	0.055	1.54455	0.236112	0.369195
175	2015	0	Jiangxi	0	1	0	0	1	0.74025	2.59537	3.83321	0.331725	0.583082	0.836546	1.04999	0.283194	12.6051	0.049	0.061871	0.053294	0.055	1.75773	0.256815	0.343417
175	2016	0	Jiangxi	0	1	0	0	1	0.81006	2.75922	3.8338	0.27525	0.599578	0.839065	0.990083	0.296834	12.5355	0.05	0.064947	0.05575	0.055	2.1783	0.454757	0.396043
175	2017	1	Jiangxi	0	1	0	0	1	0.88491	2.94459	3.83321	0.281792	0.618778	0.838453	1.0241	0.287747	12.5108	0.054	0.067291	0.060197	0.055	2.19587	0.352847	0.408847
175	2018	1	Jiangxi	0	1	0	0	1	0.95973	3.12587	3.83321	0.252002	0.677685	0.800026	1.13826	0.292897	12.4896	0.0541	0.070141	0.055611	0.055	2.68921	0.279021	0.270805
175	2019	1	Jiangxi	0	1	0	0	1	1.02662	3.28849	3.83321	0.172362	0.746518	1.00653	1.40522	0.360364	12.4713	0.0543	0.072893	0.060186	0.055	4.33112	0.470641	0.278263
175	2020	1	Jiangxi	0	1	0	0	1	1.08582	3.45505	3.83321	0.162098	0.726987	1.19399	1.53924	0.315709	12.4555	0.0547	0.081328	0.066468	0.055	4.48485	0.684243	0.289223
176	2013	0	Jiangxi	0	1	0	0	1	0.4812	1.6183	4.63759	0.408816	0.401468	1.37365	0.612806	0.390244	12.1215	0.21	0.137694	0.074015	0.102	0.982026	0.464061	0.245101
176	2014	0	Jiangxi	0	1	0	0	1	0.60797	1.73259	4.66356	0.412701	0.402278	1.50981	0.660611	0.384605	12.0409	0.228	0.143848	0.068855	0.1012	0.974746	0.448319	0.266176
176	2015	0	Jiangxi	0	1	0	0	1	0.68209	1.84153	4.66356	0.389684	0.426359	1.61149	0.768527	0.40864	12.0324	0.23	0.131728	0.094466	0.1252	1.09411	0.472069	0.255046
176	2016	0	Jiangxi	0	1	0	0	1	0.74593	1.95238	4.66228	0.34181	0.453973	1.63289	0.913443	0.406304	12.0468	0.236	0.134991	0.095981	0.1252	1.32814	0.602792	0.229715
176	2017	0	Jiangxi	0	1	0	0	1	0.81435	2.07125	4.66254	0.350333	0.478958	1.67819	1.10187	0.433132	11.9863	0.239	0.136773	0.104159	0.13	1.36715	0.487279	0.278173
176	2018	0	Jiangxi	0	1	0	0	1	0.88873	2.20277	4.66254	0.332398	0.511641	1.67334	1.29868	0.081517	11.9782	0.24	0.141238	0.110156	0.17	1.53924	0.469199	1.56179
176	2019	1	Jiangxi	0	1	0	0	1	0.95264	2.3131	4.66254	0.301514	0.540905	1.70389	1.70364	0.513859	11.9771	0.244	0.141727	0.106646	0.18	1.79396	0.522635	0.150073
176	2020	1	Jiangxi	0	1	0	0	1	1.02248	2.39996	4.66254	0.294838	0.554152	1.96691	1.97453	0.472222	11.977	0.2448	0.164401	0.11176	0.1467	1.87951	0.512177	0.174829
177	2013	0	Jiangxi	0	1	0	0	1	0.5047	1.7662	4.21888	0.497103	0.31177	0.902943	0.69482	0.339999	13.254	0.24	0.101535	0.040864	0.0621	0.627173	0.384483	0.353171
177	2014	0	Jiangxi	0	1	0	0	1	0.64062	1.89272	4.21888	0.482193	0.344369	0.925425	0.716721	0.333176	13.368	0.31	0.069563	0.042054	0.059	0.714173	0.359684	0.3698
177	2015	0	Jiangxi	0	1	0	0	1	0.7155	2.00987	4.21888	0.462753	0.360734	1.00165	0.812332	0.341572	13.538	0.32	0.081288	0.053846	0.059	0.779539	0.38144	0.376347
177	2016	0	Jiangxi	0	1	0	0	1	0.78428	2.1289	4.22167	0.394626	0.409	0.955392	0.831191	0.332144	13.6526	0.35	0.087917	0.057111	0.088	1.03642	0.501856	0.310908
177	2017	0	Jiangxi	0	1	0	0	1	0.86713	2.25849	4.22446	0.399884	0.430926	1.00799	0.923496	0.38982	13.7385	0.13	0.084646	0.063128	0.0803	1.07763	0.423098	0.21245
177	2018	1	Jiangxi	0	1	0	0	1	0.94305	2.40419	4.22645	0.381455	0.453931	1.01818	0.964861	0.421487	13.8124	0.15	0.090728	0.06508	0.0803	1.19	0.431544	0.190891
177	2019	1	Jiangxi	0	1	0	0	1	1.01234	2.51881	4.22883	0.324235	0.522464	1.03568	1.08013	0.456369	13.876	0.134	0.096615	0.069746	0.0831	1.61137	0.472809	0.169543
177	2020	1	Jiangxi	0	1	0	0	1	1.09173	2.59822	4.2308	0.331447	0.522267	1.12175	1.16884	0.458852	13.9306	0.15	0.097081	0.0721	0.088	1.57572	0.441356	0.158945
178	2013	0	Jiangxi	0	1	0	0	1	0.5222	1.6269	3.92316	0.658793	0.24992	0.508152	0.491919	0.246262	14.4161	0.049	0.073495	0.04673	0.0679	0.379361	0.138567	0.556343
178	2014	0	Jiangxi	0	1	0	0	1	0.66388	1.74109	3.92316	0.662815	0.252988	0.505659	0.480563	0.227608	14.5699	0.05	0.071279	0.061486	0.0679	0.381688	0.12703	0.59636
178	2015	0	Jiangxi	0	1	0	0	1	0.73448	1.89296	3.92316	0.60278	0.300871	0.630703	0.626989	0.263361	14.3915	0.06	0.085846	0.062262	0.0767	0.499139	0.159842	0.504274
178	2016	0	Jiangxi	0	1	0	0	1	0.79551	2.00952	3.92852	0.591768	0.311324	0.652811	0.699933	0.285194	14.5604	0.062	0.086145	0.06008	0.0767	0.526092	0.165704	0.438783
178	2017	0	Jiangxi	0	1	0	0	1	0.87686	2.14959	3.92852	0.596014	0.324146	0.843587	1.06581	0.346004	14.6409	0.08	0.089807	0.08272	0.08	0.543857	0.133956	0.276127
178	2018	1	Jiangxi	0	1	0	0	1	0.94949	2.28212	3.92852	0.593566	0.333256	0.830968	1.47029	0.341199	14.7072	0.084	0.093486	0.074136	0.08	0.561448	0.123285	0.265406
178	2019	1	Jiangxi	0	1	0	0	1	1.01772	2.40559	3.92852	0.55225	0.368026	0.905058	1.31851	0.392447	14.7618	0.0846	0.093399	0.080848	0.08	0.666411	0.144363	0.239785
178	2020	1	Jiangxi	0	1	0	0	1	1.07949	2.45012	3.92852	0.520051	0.397561	0.947563	1.35116	0.329985	14.8067	0.0849	0.082878	0.093417	0.08	0.764464	0.158426	0.264169
179	2013	0	Jiangxi	0	1	0	0	1	0.5155	1.6029	5.47164	0.358078	0.297895	1.12547	0.541258	0.301618	14.0145	0.376	0.565453	0.160504	0.2581	0.831929	0.96076	0.272752
179	2014	0	Jiangxi	0	1	0	0	1	0.6674	1.71773	5.46706	0.365373	0.328877	1.23189	0.632566	0.285311	14.1713	0.378	0.565618	0.169948	0.2581	0.900114	0.836816	0.299957
179	2015	0	Jiangxi	0	1	0	0	1	0.74497	1.86349	5.4613	0.35775	0.342177	1.35935	0.646809	0.336678	14.342	0.38	0.565697	0.265947	0.2578	0.956468	0.838777	0.26215
179	2016	0	Jiangxi	0	1	0	0	1	0.81006	2.00744	5.45551	0.364087	0.34295	1.38984	0.811983	0.323812	14.3234	0.39	0.384153	0.272264	0.2578	0.941946	0.805426	0.248684
179	2017	0	Jiangxi	0	1	0	0	1	0.87714	2.15107	5.44969	0.379869	0.338954	1.40696	1.02311	0.338755	14.4451	0.55	0.364106	0.370427	0.22	0.892291	0.740194	0.224024
179	2018	0	Jiangxi	0	1	0	0	1	0.95638	2.28249	5.44383	0.380639	0.351763	1.41224	1.12189	0.359682	14.561	0.52	0.382765	0.363677	0.095	0.924137	0.703023	0.18401
179	2019	1	Jiangxi	0	1	0	0	1	1.02821	2.39281	5.43793	0.285385	0.490242	1.27543	1.00824	0.343012	14.6714	0.5	0.37879	0.399287	0.15	1.71783	0.786212	0.176146
179	2020	1	Jiangxi	0	1	0	0	1	1.09832	2.5008	5.43082	0.290325	0.483633	1.36544	1.12375	0.300604	14.7766	0.48	0.456597	0.374598	0.15	1.66584	0.778583	0.19274
180	2013	0	Jiangxi	0	1	0	0	1	0.5385	1.5786	5.84419	0.406101	0.254768	0.916936	0.457711	0.31382	12.0648	0.64	0.631077	0.412706	0.33	0.627352	0.835088	0.19962
180	2014	0	Jiangxi	0	1	0	0	1	0.67122	1.69094	5.83708	0.422965	0.256833	1.00691	0.47111	0.281167	14.5516	0.84	0.62245	0.246945	0.345	0.60722	0.75704	0.240313
180	2015	0	Jiangxi	0	1	0	0	1	0.74449	1.81341	5.82831	0.427241	0.259678	1.13312	0.522122	0.314436	14.7283	0.842	0.565858	0.255247	0.4041	0.607803	0.732796	0.237688
180	2016	0	Jiangxi	0	1	0	0	1	0.80978	1.93292	5.81381	0.430158	0.255255	1.23348	0.616071	0.311458	14.8162	0.843	0.528857	0.429174	0.4141	0.593399	0.732399	0.284506
180	2017	0	Jiangxi	0	1	0	0	1	0.87815	2.06588	5.80484	0.452064	0.274532	1.29284	0.770895	0.351184	14.7742	0.846	0.537399	0.441186	0.4291	0.607286	0.604791	0.245615
180	2018	0	Jiangxi	0	1	0	0	1	0.94921	2.19833	5.79579	0.434134	0.301735	1.36861	0.904697	0.387154	14.7965	0.847	0.55179	0.497403	0.4391	0.695029	0.608409	0.152643
180	2019	0	Jiangxi	0	1	0	0	1	1.02274	2.30895	5.78415	0.286091	0.457394	1.38299	0.944285	0.405346	14.7846	0.85	0.568165	0.476818	0.4391	1.59877	0.896622	0.137058
180	2020	1	Jiangxi	0	1	0	0	1	1.09969	2.41614	5.77407	0.29552	0.442691	1.48759	1.07658	0.37971	14.7909	0.854	0.561086	0.476818	0.348	1.498	0.885858	0.139008
181	2013	0	Henan	0	1	0	0	1	0.6756	1.6538	5.25419	0.48084	0.337528	0.460894	0.232144	0.147308	14.7904	0.97	0.343202	0.345077	0.1608	0.701954	0.377656	0.323387
181	2014	0	Henan	0	1	0	0	1	0.74043	1.80147	5.2669	0.461136	0.369543	0.462214	0.289758	0.165407	15.0622	0.98	0.330042	0.369593	0.1602	0.801376	0.367119	0.319126
181	2015	0	Henan	0	1	0	0	1	0.87886	1.90371	5.28359	0.440314	0.393041	0.487504	0.365811	0.186989	15.1691	0.99	0.297914	0.387011	0.1566	0.892637	0.378486	0.290265
181	2016	0	Henan	0	1	0	0	1	0.94509	2.00786	5.3	0.436116	0.411208	0.523386	0.451825	0.202762	15.2313	0.71	0.305213	0.41124	0.1499	0.942887	0.350111	0.26825
181	2017	1	Henan	0	1	0	0	1	1.02271	2.163	5.31482	0.424209	0.437309	0.577262	0.530058	0.206031	15.3059	0.72	0.312701	0.451217	0.1387	1.03088	0.326466	0.300361
181	2018	1	Henan	0	1	0	0	1	1.09228	2.29524	5.32942	0.409616	0.458258	0.597716	0.594513	0.216446	15.3735	0.732	0.321937	0.488226	0.1258	1.11875	0.324007	0.326972
181	2019	1	Henan	0	1	0	0	1	1.16852	2.4242	5.34251	0.452534	0.398169	0.56577	0.558931	0.201418	15.4348	0.7579	0.404672	0.51158	0.1297	0.879866	0.329914	0.320911
181	2020	1	Henan	0	1	0	0	1	1.20462	2.3914	5.35157	0.440847	0.424852	0.598407	0.638343	0.215212	15.4905	0.76	0.415372	0.53218	0.1528	0.963718	0.304642	0.317912
182	2013	0	Henan	0	1	0	0	1	0.7317	2.1041	4.54096	0.669169	0.226058	0.49544	0.305279	0.14069	14.904	0.28	0.127917	0.119487	0.1863	0.337819	0.156572	0.745001
182	2014	0	Henan	0	1	0	0	1	0.80137	2.26811	4.55249	0.566667	0.330125	0.499733	0.354677	0.17452	14.4822	0.28	0.128758	0.142753	0.126	0.582574	0.182131	0.651329
182	2015	0	Henan	0	1	0	0	1	0.88884	2.41987	4.53223	0.566381	0.337402	0.502858	0.416487	0.179622	14.4059	0.28	0.131216	0.147245	0.1313	0.595715	0.169879	0.629193
182	2016	0	Henan	0	1	0	0	1	0.9315	2.55041	4.53252	0.566198	0.346654	0.530572	0.424807	0.180564	14.3978	0.28	0.134159	0.151053	0.136	0.612249	0.153918	0.609373
182	2017	0	Henan	0	1	0	0	1	1.01783	2.71144	4.52046	0.58295	0.345595	0.526402	0.430231	0.159338	14.3628	0.29	0.137495	0.159401	0.1407	0.592839	0.122574	0.628001
182	2018	0	Henan	0	1	0	0	1	1.09145	2.88516	4.50556	0.573897	0.351263	0.553165	0.46962	0.141926	14.3354	0.31	0.14248	0.16557	0.1527	0.612066	0.130403	0.712575
182	2019	1	Henan	0	1	0	0	1	1.16763	3.04728	4.52342	0.5328	0.413235	0.463846	0.398925	0.115861	14.3138	0.3334	0.151991	0.170978	0.1535	0.775592	0.101284	0.710205
182	2020	1	Henan	0	1	0	0	1	1.20832	3.01189	4.48738	0.513528	0.431549	0.524699	0.457825	0.121257	14.2969	0.343	0.14713	0.172359	0.1732	0.840362	0.106953	0.698292
183	2013	0	Henan	0	1	0	0	1	0.7323	1.9817	4.93378	0.461631	0.32684	0.416985	0.160322	0.140559	14.4857	0.57	0.214422	0.152917	0.1305	0.708011	0.458222	0.303919
183	2014	0	Henan	0	1	0	0	1	0.78911	2.10098	4.94158	0.356649	0.426013	0.513976	0.235446	0.161545	14.0607	0.59	0.251635	0.15439	0.1288	1.19449	0.609386	0.243128
183	2015	0	Henan	0	1	0	0	1	0.87993	2.24181	4.97029	0.349004	0.447544	0.543384	0.271209	0.183892	14.0236	0.59	0.253797	0.160038	0.1305	1.28235	0.582952	0.215846
183	2016	0	Henan	0	1	0	0	1	0.92931	2.37447	4.97406	0.347507	0.46389	0.599745	0.286224	0.183974	14.0768	0.601	0.259381	0.171069	0.1305	1.33491	0.542733	0.224505
183	2017	0	Henan	0	1	0	0	1	1.01774	2.55701	4.99636	0.358952	0.482367	0.640418	0.308649	0.185317	14.1035	0.602	0.259865	0.204723	0.1525	1.34382	0.442069	0.233316
183	2018	0	Henan	0	1	0	0	1	1.08925	2.71652	4.98341	0.347975	0.491631	0.66716	0.330463	0.187324	14.1228	0.603	0.255905	0.251077	0.135	1.41283	0.460967	0.236571
183	2019	0	Henan	0	1	0	0	1	1.16737	2.84546	4.99083	0.340876	0.508269	0.736701	0.39331	0.200539	14.1367	0.6046	0.260015	0.281525	0.1565	1.49107	0.44255	0.231738
183	2020	1	Henan	0	1	0	0	1	1.2035	2.80687	4.99452	0.329219	0.520044	0.776551	0.443858	0.216126	14.1468	0.61	0.262941	0.30028	0.1793	1.57963	0.457862	0.224843
184	2013	0	Henan	0	1	0	0	1	0.6653	1.8421	4.72328	0.601915	0.262622	0.43851	0.233516	0.151782	14.2204	0.41	0.218971	0.134055	0.1415	0.436311	0.225053	0.323472
184	2014	0	Henan	0	1	0	0	1	0.72934	1.96281	4.7281	0.547031	0.336316	0.447637	0.255549	0.159393	14.0261	0.42	0.223768	0.138507	0.1425	0.614803	0.213247	0.348237
184	2015	0	Henan	0	1	0	0	1	0.81473	2.10192	4.7542	0.522209	0.363776	0.501494	0.2954	0.168461	14.1075	0.43	0.225755	0.142872	0.1363	0.696611	0.218333	0.355154
184	2016	0	Henan	0	1	0	0	1	0.86487	2.20956	4.7542	0.521982	0.376426	0.533684	0.407868	0.171049	14.1394	0.44	0.233563	0.145965	0.142	0.721148	0.194628	0.345835
184	2017	0	Henan	0	1	0	0	1	0.94667	2.36629	4.74715	0.533812	0.380879	0.585129	0.430917	0.157796	14.1751	0.43	0.2365	0.151988	0.1566	0.713508	0.159811	0.37214
184	2018	0	Henan	0	1	0	0	1	1.01488	2.50579	4.75654	0.516267	0.39567	0.59834	0.429127	0.162517	14.2061	0.46	0.236844	0.155012	0.1566	0.766405	0.170534	0.386581
184	2019	0	Henan	0	1	0	0	1	1.08867	2.63688	4.73767	0.438258	0.483376	0.635179	0.42501	0.172418	14.2332	0.4822	0.241252	0.187172	0.154	1.10295	0.178812	0.378474
184	2020	1	Henan	0	1	0	0	1	1.12447	2.60107	4.77276	0.425107	0.495123	0.690142	0.492931	0.203389	14.2567	0.5	0.246305	0.208191	0.0962	1.1647	0.187647	0.344189
185	2013	0	Henan	0	1	0	0	1	0.6869	1.9566	5.10429	0.500356	0.330841	0.321226	0.236733	0.113192	14.7721	0.58	0.269124	0.19453	0.1512	0.661211	0.337367	0.328656
185	2014	0	Henan	0	1	0	0	1	0.75025	2.10334	5.11087	0.459134	0.385594	0.33252	0.256845	0.114405	14.8727	0.59	0.264887	0.20455	0.157	0.839829	0.338183	0.36253
185	2015	0	Henan	0	1	0	0	1	0.83885	2.21555	5.05352	0.444546	0.402173	0.364601	0.263238	0.127127	14.9502	0.6	0.260267	0.212142	0.1458	0.904682	0.344804	0.341627
185	2016	0	Henan	0	1	0	0	1	0.88226	2.33122	5.05526	0.437652	0.417657	0.400842	0.293488	0.124588	15.0638	0.62	0.259896	0.249611	0.157	0.954312	0.330608	0.335942
185	2017	0	Henan	0	1	0	0	1	0.96654	2.51707	5.06903	0.442236	0.436863	0.419011	0.324226	0.119637	15.1576	0.64	0.259519	0.280297	0.157	0.98785	0.273386	0.349333
185	2018	0	Henan	0	1	0	0	1	1.03524	2.67902	5.07754	0.426387	0.451914	0.438513	0.336531	0.120551	15.242	0.65	0.265599	0.292358	0.2202	1.05987	0.285392	0.351407
185	2019	1	Henan	0	1	0	0	1	1.10745	2.8192	5.06732	0.406081	0.469714	0.489106	0.403935	0.130694	15.3179	0.6557	0.265456	0.34884	0.2954	1.1567	0.305863	0.346628
185	2020	1	Henan	0	1	0	0	1	1.14395	2.7755	5.05352	0.387854	0.488918	0.539424	0.524924	0.137728	15.3863	0.68	0.264964	0.362072	0.3774	1.26057	0.317717	0.331684
186	2013	0	Henan	0	1	0	0	1	0.6644	1.897	4.74479	0.473694	0.307947	0.336433	0.145742	0.14915	14.4576	0.42	0.186683	0.143148	0.1168	0.650097	0.46097	0.317728
186	2014	0	Henan	0	1	0	0	1	0.72041	2.03189	4.7542	0.410031	0.395275	0.355678	0.171145	0.15247	14.5177	0.45	0.183973	0.146227	0.1079	0.964011	0.474828	0.302178
186	2015	0	Henan	0	1	0	0	1	0.8063	2.1739	4.78646	0.39785	0.419646	0.381614	0.20195	0.154933	14.8416	0.46	0.181327	0.177768	0.1282	1.05478	0.458724	0.302535
186	2016	0	Henan	0	1	0	0	1	0.85736	2.31088	4.78191	0.40007	0.435724	0.434313	0.236242	0.163775	15.0334	0.47	0.186586	0.177393	0.1213	1.08912	0.410445	0.299512
186	2017	0	Henan	0	1	0	0	1	0.9401	2.48181	4.76584	0.407776	0.455217	0.444149	0.258238	0.158847	15.2133	0.48	0.185109	0.16989	0.1305	1.11634	0.335988	0.318202
186	2018	0	Henan	0	1	0	0	1	1.00928	2.63665	4.74005	0.398326	0.452149	0.460268	0.279041	0.154697	15.379	0.44	0.182425	0.188067	0.1405	1.13512	0.37535	0.335222
186	2019	1	Henan	0	1	0	0	1	1.08164	2.76178	4.72328	0.370337	0.477364	0.529067	0.334606	0.167137	15.5316	0.3947	0.189709	0.219569	0.1349	1.289	0.411245	0.343681
186	2020	1	Henan	0	1	0	0	1	1.11516	2.73508	4.65325	0.358808	0.484799	0.584758	0.369532	0.169368	15.6721	0.3849	0.179285	0.236726	0.1563	1.35114	0.435869	0.368557
187	2013	0	Henan	0	1	0	0	1	0.5714	1.5512	5.36564	0.397089	0.399832	0.937223	0.593379	0.218635	14.3352	0.39	0.366978	0.212414	0.1966	1.00691	0.511418	0.246876
187	2014	0	Henan	0	1	0	0	1	0.62473	1.66271	5.3631	0.358674	0.431914	0.937796	0.589439	0.203861	14.2865	0.41	0.375185	0.230265	0.1986	1.20419	0.583851	0.267315
187	2015	0	Henan	0	1	0	0	1	0.70506	1.76227	5.3631	0.346882	0.456105	0.980386	0.590463	0.216579	14.3183	0.43	0.400771	0.241742	0.235	1.31487	0.567954	0.232382
187	2016	0	Henan	0	1	0	0	1	0.74986	1.87602	5.36564	0.339889	0.476076	1.02758	0.526319	0.211696	14.2674	0.36	0.42685	0.231439	0.1155	1.40068	0.541455	0.204078
187	2017	0	Henan	0	1	0	0	1	0.81296	2.05058	5.36564	0.367616	0.467168	1.03812	0.412243	0.210064	14.2698	0.36	0.45089	0.24679	0.1189	1.2708	0.449427	0.194624
187	2018	0	Henan	0	1	0	0	1	0.86669	2.26333	5.36691	0.376142	0.497082	1.09349	0.41627	0.239358	14.2718	0.38	0.47222	0.296222	0.1189	1.32153	0.337041	0.173204
187	2019	0	Henan	0	1	0	0	1	0.92665	2.81314	5.36564	0.296832	0.536293	1.40007	0.545213	0.292817	14.2735	0.3937	0.492649	0.316325	0.1212	1.80672	0.562188	0.173446
187	2020	1	Henan	0	1	0	0	1	0.96116	2.77093	5.37071	0.288547	0.515036	1.48006	0.613324	0.286542	14.2749	0.4043	0.49703	0.345712	0.146	1.78493	0.680711	0.184524
188	2013	0	Henan	0	1	0	0	1	0.6839	1.7588	5.80074	0.403704	0.242747	0.738897	0.435536	0.207682	14.6504	2.55	0.497336	0.347828	0.2076	0.601299	0.875897	0.166894
188	2014	0	Henan	0	1	0	0	1	0.74563	1.90893	5.79496	0.379416	0.297735	0.789633	0.462506	0.212137	14.7841	2.6	0.518753	0.370008	0.231	0.784719	0.850909	0.189938
188	2015	0	Henan	0	1	0	0	1	0.87954	2.00989	5.79082	0.368907	0.320492	0.847526	0.466632	0.239137	14.843	2.68	0.548039	0.369795	0.2311	0.868762	0.841822	0.185186
188	2016	0	Henan	0	1	0	0	1	0.945	2.10861	5.78415	0.368076	0.342871	0.904421	0.463702	0.222035	15.1162	2.77	0.591973	0.484971	0.1155	0.931521	0.785307	0.199956
188	2017	1	Henan	0	1	0	0	1	1.02262	2.26315	5.76388	0.386049	0.379094	0.961315	0.485509	0.235929	15.2824	2.83	0.62457	0.532268	0.1059	0.981984	0.608359	0.183345
188	2018	1	Henan	0	1	0	0	1	1.09108	2.40372	5.76046	0.379412	0.398066	1.03051	0.530569	0.249179	15.4422	2.149	0.651716	0.534935	0.1485	1.04917	0.586496	0.18514
188	2019	1	Henan	0	1	0	0	1	1.16407	2.50851	5.76217	0.385888	0.433218	0.841283	0.455157	0.191311	15.5957	2.2261	0.673725	0.555485	0.8136	1.12265	0.468774	0.193881
188	2020	1	Henan	0	1	0	0	1	1.20686	2.47206	5.76132	0.370549	0.432206	0.92959	0.563019	0.188993	15.7431	2.25	0.686259	0.5635	0.8798	1.1664	0.532305	0.198349
189	2013	0	Henan	0	1	0	0	1	0.6601	1.581	5.29046	0.418248	0.231085	0.746702	0.255966	0.214163	13.8706	1.1	0.307468	0.212533	0.2643	0.552506	0.838417	0.142557
189	2014	0	Henan	0	1	0	0	1	0.72552	1.71138	5.29183	0.40425	0.263439	0.798384	0.339161	0.219244	14.0707	1.13	0.316942	0.213592	0.2633	0.651672	0.822043	0.154531
189	2015	0	Henan	0	1	0	0	1	0.81492	1.83454	5.28634	0.401812	0.274477	0.854909	0.243724	0.246774	14.1973	1.16	0.326951	0.231857	0.2498	0.683098	0.805626	0.134161
189	2016	0	Henan	0	1	0	0	1	0.88749	1.94398	5.28082	0.402901	0.274055	0.881609	0.247306	0.248814	14.306	1.2	0.30455	0.242015	0.256	0.680206	0.801795	0.130402
189	2017	0	Henan	0	1	0	0	1	0.96917	2.11903	5.27528	0.438953	0.276538	0.925141	0.220389	0.348092	14.4632	1.24	0.339814	0.253132	0.1597	0.629996	0.648154	0.094164
189	2018	0	Henan	0	1	0	0	1	1.0445	2.25993	5.27249	0.446312	0.283018	0.989057	0.256623	0.296744	14.6173	1.26	0.347023	0.276288	0.1771	0.634126	0.606445	0.129737
189	2019	1	Henan	0	1	0	0	1	1.11947	2.38699	5.27528	0.36251	0.428952	0.773642	0.240858	0.187911	14.7681	1.2858	0.354362	0.295284	0.145	1.18328	0.575263	0.160057
189	2020	1	Henan	0	1	0	0	1	1.15955	2.3708	5.26409	0.352486	0.422807	0.881075	0.297773	0.18272	14.9159	1.32	0.355384	0.303882	0.1275	1.1995	0.637492	0.173124
190	2013	0	Henan	0	1	0	0	1	0.6081	1.4891	4.85227	0.66181	0.216246	0.480243	0.21595	0.152545	15.0433	0.69	0.232016	0.138464	0.1177	0.326749	0.184259	0.194655
190	2014	0	Henan	0	1	0	0	1	0.66781	1.60893	4.83298	0.653461	0.23654	0.46174	0.223569	0.136911	15.3006	0.7	0.212437	0.138843	0.1177	0.36198	0.168332	0.232146
190	2015	0	Henan	0	1	0	0	1	0.75612	1.70822	4.83298	0.649922	0.249032	0.482823	0.219801	0.158334	15.4619	0.71	0.193015	0.159922	0.084	0.383172	0.155474	0.21584
190	2016	0	Henan	0	1	0	0	1	0.80499	1.82859	4.84374	0.654091	0.253322	0.528556	0.204816	0.128711	15.5773	0.72	0.194827	0.14458	0.037	0.387289	0.14155	0.226306
190	2017	0	Henan	0	1	0	0	1	0.87193	1.97969	4.8416	0.633477	0.286549	0.566342	0.225825	0.164014	15.8404	0.58	0.192335	0.181092	0.055	0.452344	0.126246	0.187202
190	2018	0	Henan	0	1	0	0	1	0.93079	2.08322	4.80221	0.643602	0.276845	0.621491	0.267483	0.170139	16.1035	0.54	0.201306	0.152839	0.055	0.43015	0.123583	0.203522
190	2019	0	Henan	0	1	0	0	1	1.00392	2.17209	4.81991	0.457686	0.443222	0.69746	0.332066	0.175603	16.3667	0.5039	0.2386	0.161079	0.0408	0.968398	0.216506	0.217697
190	2020	1	Henan	0	1	0	0	1	1.04794	2.117	4.80221	0.449713	0.440915	0.738646	0.420799	0.180173	16.6298	0.47	0.238767	0.155066	0.0491	0.980437	0.243204	0.2292
191	2013	0	Henan	0	1	0	0	1	0.5722	1.4491	4.68888	0.608185	0.267322	0.634029	0.338137	0.224236	14.3466	0.39	0.153459	0.103145	0.0817	0.43954	0.204697	0.146282
191	2014	0	Henan	0	1	0	0	1	0.62885	1.57144	4.71357	0.588048	0.298568	0.638707	0.389555	0.199345	14.4544	0.41	0.155533	0.113307	0.0575	0.507728	0.192815	0.173263
191	2015	0	Henan	0	1	0	0	1	0.72018	1.66065	4.73767	0.579132	0.316886	0.674571	0.383194	0.199583	14.7667	0.42	0.161182	0.1272	0.0341	0.547174	0.179548	0.181031
191	2016	0	Henan	0	1	0	0	1	0.76687	1.77517	4.64257	0.580084	0.322822	0.71636	0.404729	0.19779	14.9001	0.38	0.167497	0.119497	0.0279	0.55651	0.167378	0.150336
191	2017	0	Henan	0	1	0	0	1	0.82908	1.9044	4.64884	0.586443	0.330224	0.755068	0.36455	0.21152	15.0909	0.35	0.171833	0.134463	0.03	0.563096	0.142099	0.140157
191	2018	0	Henan	0	1	0	0	1	0.88191	1.99784	4.65455	0.547432	0.365732	0.837332	0.441448	0.314295	15.2788	0.32	0.175626	0.17238	0.031	0.668086	0.158587	0.111198
191	2019	0	Henan	0	1	0	0	1	0.9505	2.08493	4.66048	0.52945	0.368412	0.957722	0.54197	0.374045	15.4638	0.2814	0.180235	0.182539	0.0192	0.695838	0.192914	0.10769
191	2020	1	Henan	0	1	0	0	1	0.99055	2.03505	4.47542	0.364947	0.522891	1.09177	0.592283	0.304632	15.6459	0.26	0.181872	0.179707	0.0464	1.43279	0.307338	0.13934
192	2013	0	Henan	0	1	0	0	1	0.5866	1.8709	4.56953	0.387731	0.367463	0.825291	0.410503	0.252363	13.2472	0.23	0.118627	0.11342	0.1214	0.947725	0.63138	0.291414
192	2014	0	Henan	0	1	0	0	1	0.64642	1.99342	4.56953	0.35844	0.376707	0.828162	0.43378	0.278737	13.3463	0.23	0.097073	0.113584	0.1316	1.05096	0.738905	0.290014
192	2015	0	Henan	0	1	0	0	1	0.71775	2.06191	4.56953	0.342673	0.396039	0.891917	0.450829	0.266337	13.2283	0.23	0.099103	0.135021	0.1332	1.15574	0.762498	0.267517
192	2016	0	Henan	0	1	0	0	1	0.76193	2.14445	4.57515	0.315211	0.425203	0.98731	0.503832	0.28863	13.3155	0.2	0.097423	0.136122	0.161	1.34895	0.823528	0.235108
192	2017	0	Henan	0	1	0	0	1	0.82683	2.30797	4.58074	0.323075	0.44627	0.982922	0.645444	0.335008	13.4049	0.18	0.099849	0.144324	0.171	1.38132	0.713937	0.210168
192	2018	0	Henan	0	1	0	0	1	0.8842	2.43884	4.58352	0.306666	0.465399	0.977571	0.710544	0.368424	13.4253	0.18	0.123782	0.145352	0.1157	1.51761	0.743169	0.205045
192	2019	0	Henan	0	1	0	0	1	0.95424	2.55462	4.58352	0.296816	0.47289	0.945729	0.715865	0.372646	13.43	0.1811	0.125719	0.163457	0.2319	1.59321	0.77588	0.188668
192	2020	1	Henan	0	1	0	0	1	0.98926	2.51507	4.45632	0.283718	0.483199	1.07769	0.820163	0.345843	13.431	0.1849	0.128005	0.164077	0.198	1.70309	0.821529	0.201016
193	2013	0	Henan	0	1	0	0	1	0.6701	1.8871	5.00551	0.537303	0.311534	0.583407	0.272475	0.204289	13.9155	0.33	0.267619	0.171731	0.4023	0.579811	0.281335	0.187036
193	2014	0	Henan	0	1	0	0	1	0.73876	2.02414	4.99268	0.508219	0.342478	0.618653	0.367282	0.201925	14.1056	0.35	0.261655	0.171889	0.4083	0.67388	0.293776	0.217195
193	2015	0	Henan	0	1	0	0	1	0.85144	2.13205	4.99268	0.490197	0.35899	0.65937	0.444563	0.212923	14.4636	0.39	0.264598	0.186829	0.4065	0.732337	0.307657	0.216247
193	2016	0	Henan	0	1	0	0	1	0.92066	2.23532	4.99268	0.49099	0.364722	0.694362	0.484618	0.217063	14.7024	0.4	0.25879	0.191116	0.4065	0.742829	0.29387	0.200951
193	2017	0	Henan	0	1	0	0	1	1.00264	2.40858	4.98527	0.48575	0.382011	0.761374	0.497913	0.21002	14.8811	0.42	0.29217	0.211054	0.1534	0.786436	0.272237	0.201149
193	2018	0	Henan	0	1	0	0	1	1.06687	2.53229	4.99636	0.465546	0.403975	0.811442	0.542327	0.229696	15.0599	0.43	0.279132	0.227029	0.1259	0.867743	0.28027	0.184703
193	2019	0	Henan	0	1	0	0	1	1.13719	2.62539	5.00003	0.406502	0.465169	0.822323	0.529231	0.23575	15.2386	0.4365	0.284295	0.257683	0.1378	1.14432	0.315692	0.200078
193	2020	1	Henan	0	1	0	0	1	1.15817	2.57462	5.23541	0.398832	0.447006	0.926734	0.591008	0.240997	15.4174	0.46	0.308414	0.258465	0.438	1.12079	0.386534	0.191567
194	2013	0	Henan	0	1	0	0	1	0.906	1.9352	5.69135	0.534386	0.318081	0.725007	0.361229	0.150726	14.6766	0.98	0.365495	0.192026	0.2943	0.595226	0.276079	0.221814
194	2014	0	Henan	0	1	0	0	1	0.98047	2.0739	5.68213	0.494219	0.362649	0.760483	0.407836	0.140198	14.8115	0.98	0.351971	0.193284	0.3043	0.733782	0.289614	0.256308
194	2015	0	Henan	0	1	0	0	1	1.07339	2.18049	5.68213	0.481857	0.376993	0.787713	0.414403	0.154287	15.0651	1.06	0.412598	0.191897	0.3706	0.782376	0.292929	0.23978
194	2016	0	Henan	0	1	0	0	1	1.14537	2.28531	5.64333	0.48492	0.384006	0.811594	0.40269	0.149222	15.2779	1.02	0.429234	0.244239	0.1409	0.791894	0.270301	0.234187
194	2017	0	Henan	0	1	0	0	1	1.23725	2.46315	5.64727	0.493713	0.386973	0.827289	0.396192	0.151309	15.4421	1.04	0.440122	0.248644	0.1554	0.7838	0.241667	0.220132
194	2018	0	Henan	0	1	0	0	1	1.31887	2.62335	5.65167	0.470156	0.412365	0.877679	0.435419	0.169916	15.6063	1.06	0.448284	0.258476	0.1654	0.877081	0.249838	0.196362
194	2019	1	Henan	0	1	0	0	1	1.40461	2.77077	5.65339	0.315807	0.545699	1.06891	0.520836	0.186906	15.7705	1.07	0.455316	0.246731	0.203	1.72795	0.438538	0.209006
194	2020	1	Henan	0	1	0	0	1	1.42903	2.73051	5.68721	0.30573	0.534833	1.16052	0.565254	0.185472	15.9346	1.09	0.44808	0.278096	0.2355	1.74937	0.521499	0.206513
195	2013	0	Henan	0	1	0	0	1	0.841	1.9845	5.03247	0.460579	0.291019	0.609707	0.588429	0.176287	13.8649	0.73	0.283822	0.138209	0.2312	0.631854	0.539325	0.227538
195	2014	0	Henan	0	1	0	0	1	0.921	2.13248	5.01638	0.424936	0.331883	0.646975	0.615882	0.189232	14.1274	0.76	0.293367	0.148898	0.27	0.78102	0.572275	0.240105
195	2015	0	Henan	0	1	0	0	1	1.01158	2.24617	5.01638	0.413385	0.348242	0.693382	0.634911	0.209937	14.4557	0.8	0.309121	0.164576	0.27	0.842416	0.576639	0.234714
195	2016	0	Henan	0	1	0	0	1	1.0793	2.37647	5.01998	0.422259	0.356284	0.742296	0.663015	0.198666	14.8996	0.8	0.323919	0.166278	0.27	0.843757	0.524459	0.253744
195	2017	0	Henan	0	1	0	0	1	1.1823	2.54323	5.03954	0.477222	0.336104	0.733142	0.700738	0.172266	15.1221	0.78	0.332695	0.166281	0.2243	0.704293	0.391167	0.299328
195	2018	0	Henan	0	1	0	0	1	1.26385	2.68874	5.0413	0.465048	0.352919	0.769357	0.734362	0.195868	15.3447	0.8	0.349642	0.263404	0.223	0.758888	0.391414	0.263587
195	2019	1	Henan	0	1	0	0	1	1.34595	2.82943	5.03777	0.445781	0.384319	0.766566	0.650298	0.166402	15.5673	0.81	0.343296	0.273832	0.223	0.862126	0.38113	0.289004
195	2020	1	Henan	0	1	0	0	1	1.38499	2.78834	5.00551	0.437365	0.36212	0.834578	0.704919	0.167932	15.7898	0.84	0.346259	0.272639	0.238	0.827959	0.458461	0.293829
196	2013	0	Henan	0	1	0	0	1	0.7259	2.0581	5.20916	0.578232	0.239649	0.545777	0.418201	0.229609	14.9225	0.58	0.311497	0.165692	0.3694	0.414452	0.314958	0.408668
196	2014	0	Henan	0	1	0	0	1	0.80383	2.22581	5.19117	0.526337	0.2912	0.560429	0.441491	0.188309	15.017	0.58	0.313623	0.170727	0.3694	0.553258	0.346666	0.206026
196	2015	0	Henan	0	1	0	0	1	0.88448	2.35089	5.19268	0.50776	0.309651	0.581997	0.459764	0.192651	15.0539	0.59	0.315551	0.168286	0.3694	0.609838	0.359595	0.207527
196	2016	0	Henan	0	1	0	0	1	0.94966	2.46581	5.19419	0.510837	0.317852	0.610398	0.466146	0.18787	15.1375	0.59	0.325319	0.192414	0.3694	0.622219	0.335354	0.211338
196	2017	0	Henan	0	1	0	0	1	1.04025	2.62977	5.18052	0.4857	0.345201	0.690123	0.54054	0.20647	15.2328	0.59	0.329416	0.201817	0.3694	0.710729	0.348156	0.192874
196	2018	0	Henan	0	1	0	0	1	1.11089	2.80593	5.13677	0.466438	0.36692	0.737986	0.589808	0.219561	15.3241	0.55	0.328822	0.215789	0.111	0.786642	0.357247	0.183855
196	2019	0	Henan	0	1	0	0	1	1.1874	2.95825	5.13677	0.359983	0.462676	0.834925	0.636295	0.259833	15.4116	0.5136	0.259416	0.227542	0.209	1.28527	0.492637	0.165444
196	2020	1	Henan	0	1	0	0	1	1.21961	2.90667	4.98713	0.350257	0.451146	0.906542	0.648354	0.247361	15.4954	0.5043	0.25819	0.249272	0.217	1.28804	0.567007	0.177239
197	2013	0	Henan	0	1	0	0	1	0.6793	1.7831	5.13517	0.449303	0.279365	0.492821	0.398146	0.189201	14.1821	0.72	0.267029	0.136304	0.4274	0.621774	0.603896	0.177538
197	2014	0	Henan	0	1	0	0	1	0.75162	1.92659	5.12228	0.429725	0.315288	0.481287	0.367902	0.180422	14.3701	0.75	0.263174	0.135974	0.4279	0.733697	0.593374	0.213404
197	2015	0	Henan	0	1	0	0	1	0.86394	2.03856	5.12228	0.417697	0.3328	0.49009	0.339427	0.105031	14.6275	1.02	0.265275	0.150818	0.4279	0.796751	0.59733	0.332682
197	2016	0	Henan	0	1	0	0	1	0.93064	2.14825	5.12066	0.423077	0.345734	0.578629	0.426392	0.180906	14.7968	1.16	0.271124	0.152216	0.4281	0.817188	0.546447	0.192173
197	2017	0	Henan	0	1	0	0	1	1.0199	2.31988	5.11904	0.439907	0.349378	0.523254	0.390903	0.182629	15.0183	1.23	0.274628	0.173871	0.4281	0.794209	0.478997	0.176535
197	2018	0	Henan	0	1	0	0	1	1.08531	2.43224	5.15418	0.420313	0.37249	0.655512	0.452265	0.186127	15.2398	1.08	0.274459	0.207556	0.4282	0.886222	0.492918	0.181761
197	2019	0	Henan	0	1	0	0	1	1.15784	2.51937	5.14946	0.26498	0.499166	0.793495	0.531037	0.223193	15.4614	0.9304	0.273526	0.214873	0.4426	1.88378	0.890079	0.171429
197	2020	1	Henan	0	1	0	0	1	1.18032	2.46568	5.02892	0.24343	0.497456	0.903318	0.605391	0.235601	15.6829	0.88	0.269775	0.220388	0.3622	2.04353	1.06443	0.169222
198	2013	0	Henan	0	1	0	0	1	0.642	1.9073	4.65842	0.639254	0.224094	0.45765	0.302202	0.141438	14.0429	0.84	0.191445	0.111883	0.1726	0.350556	0.213766	0.285679
198	2014	0	Henan	0	1	0	0	1	0.71168	2.05515	4.63759	0.560563	0.290114	0.540009	0.365942	0.155659	14.1722	0.85	0.193499	0.117448	0.1726	0.51754	0.266382	0.336949
198	2015	0	Henan	0	1	0	0	1	0.83992	2.17264	4.63759	0.529378	0.318976	0.580353	0.356892	0.170043	14.2964	0.87	0.199648	0.118195	0.1726	0.602549	0.286461	0.327273
198	2016	0	Henan	0	1	0	0	1	0.90926	2.30423	4.64284	0.51494	0.339583	0.618872	0.362826	0.162874	14.4747	0.9	0.188884	0.114269	0.1726	0.659462	0.282513	0.34989
198	2017	0	Henan	0	1	0	0	1	1.00189	2.47	4.64284	0.506688	0.363799	0.507419	0.330659	0.16472	14.6561	0.85	0.220402	0.131714	0.0762	0.717993	0.255606	0.344834
198	2018	0	Henan	0	1	0	0	1	1.06706	2.59437	4.7013	0.484497	0.388838	0.705038	0.335874	0.171251	14.8375	0.86	0.214082	0.155952	0.0967	0.80256	0.261465	0.326847
198	2019	0	Henan	0	1	0	0	1	1.14048	2.68486	4.69138	0.412043	0.449727	0.788776	0.369336	0.185534	15.0189	0.8694	0.23332	0.192275	0.132	1.09146	0.335476	0.305683
198	2020	1	Henan	0	1	0	0	1	1.17256	2.65209	4.62434	0.404933	0.443612	0.893756	0.402456	0.198603	15.2002	0.873	0.231668	0.210336	0.3084	1.09552	0.374025	0.284747
199	2013	0	Henan	0	1	0	0	1	0.6689	1.7745	5.27805	0.389528	0.348835	0.573453	0.447881	0.183713	14.635	1.23	0.365643	0.24149	0.2421	0.895533	0.671674	0.181593
199	2014	0	Henan	0	1	0	0	1	0.73091	1.89814	5.27805	0.382569	0.362148	0.566885	0.492027	0.172016	14.7863	1.28	0.378969	0.280823	0.2436	0.946622	0.667289	0.218525
199	2015	0	Henan	0	1	0	0	1	0.81986	1.99952	5.2669	0.374516	0.387516	0.609058	0.471256	0.181919	14.9027	1.27	0.345664	0.288449	0.2485	1.03471	0.635403	0.23416
199	2016	0	Henan	0	1	0	0	1	0.87	2.12278	5.25135	0.366453	0.409169	0.631058	0.486156	0.183416	15.0114	1.27	0.351862	0.294031	0.2485	1.11657	0.612296	0.223034
199	2017	0	Henan	0	1	0	0	1	0.94151	2.30769	5.25277	0.376576	0.424046	0.658435	0.485095	0.176969	15.1164	0.95	0.34054	0.256867	0.2485	1.12606	0.529448	0.226579
199	2018	0	Henan	0	1	0	0	1	1.00855	2.48029	5.25561	0.371925	0.443858	0.661996	0.478142	0.183756	15.2087	0.95	0.349508	0.293944	0.2385	1.19341	0.49526	0.219569
199	2019	1	Henan	0	1	0	0	1	1.07897	2.6294	5.24992	0.381885	0.463666	0.589223	0.421623	0.144541	15.2899	0.954	0.33763	0.319034	0.1159	1.21415	0.404437	0.232786
199	2020	1	Henan	0	1	0	0	1	1.1249	2.58358	5.31214	0.279468	0.495455	0.805173	0.573204	0.178739	15.3613	0.933	0.377465	0.312368	0.1559	1.77285	0.805378	0.230285
200	2013	0	Henan	0	1	0	0	1	0.6635	1.8077	5.2017	0.403891	0.278996	0.725738	0.328103	0.194283	14.069	1.17	0.351963	0.213557	0.1936	0.690769	0.785143	0.149898
200	2014	0	Henan	0	1	0	0	1	0.72493	1.95348	5.2017	0.379708	0.312619	0.642494	0.373486	0.199289	14.3047	1.18	0.330272	0.23258	0.1946	0.823315	0.81029	0.178386
200	2015	0	Henan	0	1	0	0	1	0.81889	2.0654	5.2017	0.377012	0.333205	0.801316	0.40045	0.207834	14.4779	1.19	0.318438	0.281805	0.2387	0.883805	0.768634	0.182281
200	2016	0	Henan	0	1	0	0	1	0.8681	2.18256	5.19268	0.377823	0.347033	0.835182	0.395109	0.210944	14.606	0.95	0.318031	0.297356	0.2482	0.918505	0.728234	0.179881
200	2017	0	Henan	0	1	0	0	1	0.93916	2.35757	5.1957	0.390834	0.363624	0.876871	0.355358	0.219412	14.8233	1.12	0.32365	0.336326	0.2374	0.93038	0.628252	0.174932
200	2018	0	Henan	0	1	0	0	1	1.00626	2.50432	5.2017	0.38777	0.380545	0.902931	0.409302	0.225216	15.0406	1.03	0.331525	0.341725	0.2184	0.981366	0.597427	0.185133
200	2019	1	Henan	0	1	0	0	1	1.07852	2.65237	5.2032	0.385426	0.40795	0.86734	0.408827	0.198163	15.2579	0.93	0.344639	0.377981	0.1687	1.05844	0.536093	0.204604
200	2020	1	Henan	0	1	0	0	1	1.12542	2.6215	5.28221	0.361951	0.396947	0.946331	0.498724	0.199387	15.4752	0.94	0.362947	0.38186	0.1975	1.09669	0.666119	0.215947
201	2013	0	Henan	0	1	0	0	1	0.6268	1.6096	4.93378	0.436467	0.291561	0.687789	0.351896	0.252386	13.9899	0.98	0.234946	0.187828	0.103	0.668004	0.623121	0.130727
201	2014	0	Henan	0	1	0	0	1	0.68175	1.72012	4.93378	0.405275	0.313672	0.733688	0.489265	0.235181	14.2234	0.99	0.23227	0.203124	0.104	0.773973	0.69349	0.147594
201	2015	0	Henan	0	1	0	0	1	0.81541	1.8171	4.92395	0.399712	0.335809	0.787947	0.522516	0.261519	14.5941	1	0.235409	0.216471	0.1248	0.840129	0.661673	0.158876
201	2016	0	Henan	0	1	0	0	1	0.86439	1.91842	4.91402	0.400029	0.3506	0.913888	0.683057	0.264404	14.6952	0.61	0.240493	0.225477	0.0831	0.876437	0.623383	0.152872
201	2017	0	Henan	0	1	0	0	1	0.93635	2.06849	4.91999	0.429709	0.355404	0.869364	0.728096	0.253239	14.7963	0.64	0.24208	0.234823	0.0831	0.82708	0.500075	0.157727
201	2018	0	Henan	0	1	0	0	1	1.00305	2.20088	4.92986	0.42889	0.36719	0.904518	0.749688	0.283003	14.8703	0.64	0.246953	0.237872	0.0811	0.85614	0.475474	0.156199
201	2019	1	Henan	0	1	0	0	1	1.07211	2.32245	4.9279	0.387086	0.454437	0.757931	0.720573	0.204354	14.9244	0.645	0.22868	0.235079	0.0709	1.17399	0.409411	0.176048
201	2020	1	Henan	0	1	0	0	1	1.11465	2.29186	5.03069	0.362302	0.448779	0.827763	0.763151	0.203615	14.964	0.6443	0.259977	0.247146	0.0672	1.23869	0.521439	0.179496
202	2013	0	Henan	0	1	0	0	1	0.6889	1.7092	5.24133	0.34972	0.353332	0.672536	0.287849	0.213037	14.1781	1.17	0.380407	0.352708	0.2837	1.01033	0.8491	0.147198
202	2014	0	Henan	0	1	0	0	1	0.75378	1.8316	5.24133	0.362721	0.366333	0.674932	0.331434	0.201535	14.45	1.2	0.369417	0.358161	0.2837	1.00996	0.74698	0.173385
202	2015	0	Henan	0	1	0	0	1	0.83062	1.92774	5.22244	0.353595	0.394161	0.735965	0.339224	0.211698	14.5919	1.23	0.358555	0.37204	0.325	1.11472	0.713371	0.175468
202	2016	0	Henan	0	1	0	0	1	0.88141	2.04084	5.22244	0.353304	0.411138	0.784563	0.309792	0.208382	14.789	1.12	0.352678	0.373535	0.325	1.16369	0.66673	0.171695
202	2017	0	Henan	0	1	0	0	1	0.95557	2.21467	5.22391	0.371102	0.421895	0.815207	0.301477	0.198324	14.8935	1.12	0.34975	0.378179	0.325	1.13687	0.557804	0.175395
202	2018	0	Henan	0	1	0	0	1	1.02432	2.37814	5.22683	0.369458	0.436047	0.844126	0.376061	0.201139	14.9557	0.99	0.358394	0.387803	0.326	1.18023	0.526394	0.188326
202	2019	1	Henan	0	1	0	0	1	1.10478	2.5118	5.22244	0.414681	0.407739	0.815031	0.406004	0.187429	14.9927	0.85	0.371296	0.432625	0.326	0.983259	0.428231	0.190497
202	2020	1	Henan	0	1	0	0	1	1.15507	2.47051	5.35927	0.382998	0.400063	0.901717	0.464792	0.198678	15.0146	0.76	0.387785	0.448945	0.336	1.04456	0.566424	0.18418
203	2013	0	Henan	0	1	0	0	1	0.709	1.8611	5.48864	0.429342	0.327844	0.580562	0.366932	0.17995	14.7361	1.75	0.549352	0.265544	0.4235	0.763597	0.565551	0.173481
203	2014	0	Henan	0	1	0	0	1	0.7737	2.00726	5.48639	0.419698	0.355479	0.587044	0.408379	0.177997	15.0327	1.77	0.548721	0.3408	0.4816	0.846988	0.53568	0.197612
203	2015	0	Henan	0	1	0	0	1	0.85202	2.11635	5.46245	0.405698	0.384489	0.603944	0.391399	0.180487	15.1711	2.09	0.495698	0.355795	0.5012	0.947723	0.517164	0.203659
203	2016	0	Henan	0	1	0	0	1	0.90156	2.23845	5.43201	0.401522	0.40675	0.728213	0.37372	0.176074	15.4713	2.41	0.512473	0.373563	0.5378	1.01302	0.477501	0.198979
203	2017	0	Henan	0	1	0	0	1	0.97526	2.42021	5.41884	0.40766	0.41951	0.757769	0.356431	0.172456	15.6978	2.42	0.5177	0.38152	0.5366	1.02907	0.423956	0.189405
203	2018	0	Henan	0	1	0	0	1	1.04587	2.59419	5.41401	0.404562	0.432433	0.790194	0.38509	0.183793	15.9168	1.77	0.533725	0.335604	0.5216	1.06889	0.402893	0.188916
203	2019	1	Henan	0	1	0	0	1	1.12597	2.71005	5.40916	0.449754	0.397144	0.767543	0.374474	0.163099	16.1284	1.1192	0.548286	0.34786	0.5219	0.883026	0.340411	0.196231
203	2020	1	Henan	0	1	0	0	1	1.17282	2.66545	5.55598	0.425964	0.390909	0.861449	0.445041	0.169785	16.333	1.12	0.563686	0.359209	0.5561	0.917705	0.429913	0.192069
204	2013	0	Henan	0	1	0	0	1	0.794	1.8518	5.10099	0.388595	0.304996	0.87885	0.450404	0.191945	14.2034	0.41	0.37356	0.146981	0.4627	0.784868	0.788504	0.149626
204	2014	0	Henan	0	1	0	0	1	0.86673	1.99372	5.10264	0.400756	0.309863	0.89984	0.480218	0.184609	14.3607	0.44	0.370726	0.160334	0.4613	0.773196	0.72209	0.159869
204	2015	0	Henan	0	1	0	0	1	0.95462	2.10676	5.09434	0.390022	0.32568	0.944057	0.494514	0.139479	14.6623	0.44	0.366943	0.166261	0.4613	0.835029	0.72893	0.220662
204	2016	0	Henan	0	1	0	0	1	1.01714	2.20614	5.09767	0.393868	0.34093	0.984068	0.515042	0.200165	14.7438	0.41	0.377754	0.183493	0.159	0.865594	0.673326	0.139879
204	2017	0	Henan	0	1	0	0	1	1.10279	2.36357	5.10099	0.347113	0.380082	1.07876	0.56167	0.224453	14.5616	0.45	0.377735	0.193356	0.151	1.09498	0.785924	0.125342
204	2018	0	Henan	0	1	0	0	1	1.17985	2.50111	5.10923	0.346316	0.399398	1.10859	0.539501	0.258938	14.5183	0.47	0.388481	0.249394	0.1754	1.15328	0.734302	0.114687
204	2019	1	Henan	0	1	0	0	1	1.25826	2.61133	5.08766	0.320897	0.446173	1.08893	0.518092	0.246128	14.5081	0.4874	0.369238	0.260595	0.1754	1.39039	0.725871	0.113187
204	2020	1	Henan	0	1	0	0	1	1.3051	2.56703	5.08429	0.312707	0.436012	1.24581	0.584979	0.253767	14.5056	0.5	0.358005	0.269083	0.1685	1.39431	0.803566	0.11507
205	2013	0	Henan	0	1	0	0	1	0.7946	1.8512	4.3673	0.419241	0.323661	0.673915	0.41126	0.179216	14.4391	0.21	0.151958	0.059818	0.143	0.772018	0.613246	0.141776
205	2014	0	Henan	0	1	0	0	1	0.86899	1.99107	4.35341	0.433617	0.319118	0.689372	0.435515	0.173454	14.0358	0.23	0.147438	0.065301	0.252	0.735946	0.570238	0.15445
205	2015	0	Henan	0	1	0	0	1	0.95714	2.10405	4.3322	0.424019	0.334043	0.680468	0.452208	0.197044	14.2748	0.24	0.147801	0.067914	0.2235	0.787801	0.570582	0.178013
205	2016	0	Henan	0	1	0	0	1	1.01771	2.20328	4.33932	0.423905	0.357387	0.711899	0.451274	0.186305	14.4086	0.24	0.147336	0.073178	0.235	0.843082	0.515934	0.193361
205	2017	0	Henan	0	1	0	0	1	1.10232	2.36048	4.34639	0.423125	0.379173	0.751352	0.464388	0.183538	14.6342	0.25	0.143812	0.077903	0.1265	0.896126	0.467243	0.213454
205	2018	1	Henan	0	1	0	0	1	1.17618	2.5001	4.39786	0.417239	0.400359	0.784689	0.447785	0.193593	14.8597	0.27	0.14108	0.090423	0.1022	0.959545	0.437244	0.221954
205	2019	1	Henan	0	1	0	0	1	1.25318	2.60545	4.3673	0.39794	0.425786	0.779537	0.437424	0.18103	15.0852	0.2819	0.13688	0.094114	0.205	1.06997	0.442967	0.224769
205	2020	1	Henan	0	1	0	0	1	1.30105	2.56884	4.32863	0.395046	0.41294	0.892444	0.48047	0.184977	15.3107	0.274	0.134217	0.098044	0.1494	1.0453	0.486057	0.221918
206	2013	0	Henan	0	1	0	0	1	0.7704	1.8516	4.95124	0.404129	0.306756	0.787939	0.381621	0.198736	14.0773	0.38	0.326361	0.131785	0.2806	0.759055	0.715405	0.129434
206	2014	0	Henan	0	1	0	0	1	0.84181	1.99205	4.957	0.413953	0.314708	0.812105	0.414724	0.188014	14.1042	0.39	0.310158	0.137707	0.277	0.760251	0.655484	0.146776
206	2015	0	Henan	0	1	0	0	1	0.92458	2.10502	4.91602	0.402902	0.326668	0.868546	0.423778	0.191545	14.4097	0.4	0.305017	0.140085	0.299	0.810788	0.671207	0.153079
206	2016	0	Henan	0	1	0	0	1	0.98254	2.20642	4.95891	0.402158	0.343057	0.808135	0.394302	0.196354	14.5111	0.35	0.292856	0.149415	0.3114	0.853039	0.633546	0.171497
206	2017	0	Henan	0	1	0	0	1	1.06031	2.36601	4.96081	0.408149	0.366121	0.930392	0.408623	0.198138	14.6572	0.36	0.28353	0.151803	0.3114	0.897027	0.553058	0.166997
206	2018	0	Henan	0	1	0	0	1	1.13446	2.50597	4.96462	0.402131	0.389891	0.94887	0.392483	0.224273	14.796	0.37	0.219501	0.21107	0.006	0.969561	0.517203	0.147154
206	2019	1	Henan	0	1	0	0	1	1.20867	2.61231	4.97029	0.411051	0.39532	0.926009	0.382921	0.19378	14.9278	0.3788	0.281513	0.214297	0.0545	0.96173	0.471058	0.157519
206	2020	1	Henan	0	1	0	0	1	1.25727	2.56807	4.82864	0.412092	0.377872	1.04433	0.407464	0.193527	15.0531	0.38	0.275248	0.229701	0.1704	0.916962	0.509683	0.164275
207	2013	0	Henan	0	1	0	0	1	0.8121	1.8442	5.62399	0.345229	0.330829	0.86852	0.42813	0.199862	14.0226	1.06	0.652828	0.289675	0.533	0.958289	0.938443	0.164071
207	2014	0	Henan	0	1	0	0	1	0.88548	2.0052	5.62006	0.34317	0.359338	0.914473	0.530158	0.198224	14.6357	1.12	0.6398	0.340412	0.53	1.04711	0.86697	0.197376
207	2015	0	Henan	0	1	0	0	1	1.02059	2.10366	5.62595	0.32572	0.397316	1.00121	0.566196	0.231328	14.7633	1.18	0.635251	0.345122	0.4082	1.21981	0.850293	0.17649
207	2016	0	Henan	0	1	0	0	1	1.08548	2.20385	5.63181	0.31343	0.427242	1.0566	0.565261	0.238161	14.8828	1.2	0.63583	0.356598	0.2865	1.36312	0.827375	0.160289
207	2017	0	Henan	0	1	0	0	1	1.1672	2.35879	5.63473	0.312418	0.456584	1.11723	0.546724	0.232675	15.0953	1.24	0.659452	0.376487	0.1647	1.46145	0.739399	0.157781
207	2018	0	Henan	0	1	0	0	1	1.2534	2.50524	5.63861	0.312282	0.476856	1.1233	0.535188	0.222329	15.3079	1.337	0.533418	0.471564	0.3172	1.527	0.675226	0.173009
207	2019	1	Henan	0	1	0	0	1	1.33963	2.62664	5.64631	0.309332	0.481175	1.07204	0.510219	0.199133	15.5203	1.377	0.651546	0.559507	0.4437	1.55553	0.677244	0.190883
207	2020	1	Henan	0	1	0	0	1	1.37724	2.58091	5.64343	0.316623	0.481625	1.19853	0.57716	0.204857	15.7328	1.43	0.580209	0.612983	0.269	1.52113	0.6372	0.191964
208	2013	0	Henan	0	1	0	0	1	0.8702	1.873	5.18965	0.350106	0.34326	0.603573	0.771097	0.133473	14.4751	0.46	0.288779	0.130908	0.2145	0.980444	0.875831	0.176949
208	2014	0	Henan	0	1	0	0	1	0.95074	2.01737	5.19419	0.358287	0.354116	0.632621	0.819934	0.135575	14.5979	0.46	0.27933	0.142914	0.1721	0.988357	0.802699	0.18295
208	2015	0	Henan	0	1	0	0	1	1.03483	2.11819	5.17439	0.356735	0.363716	0.681172	0.847441	0.150482	14.7274	0.48	0.280933	0.132473	0.0021	1.01957	0.783633	0.173599
208	2016	0	Henan	0	1	0	0	1	1.09917	2.21963	5.18814	0.353849	0.411018	0.706852	0.947623	0.104554	14.8273	0.5	0.287147	0.155186	0.0539	1.16156	0.664501	0.233713
208	2017	0	Henan	0	1	0	0	1	1.18671	2.39189	5.19268	0.355288	0.440688	0.741308	1.00621	0.155101	14.9686	0.53	0.293281	0.15735	0.1212	1.24037	0.574248	0.164116
208	2018	0	Henan	0	1	0	0	1	1.27082	2.53816	5.21361	0.339225	0.465004	0.751914	0.962931	0.161531	15.1075	0.56	0.296844	0.20056	0.1204	1.37078	0.577113	0.162201
208	2019	1	Henan	0	1	0	0	1	1.35521	2.65619	5.21951	0.373993	0.437502	0.772394	0.905681	0.200842	15.2441	0.59	0.306859	0.223871	0.1154	1.16981	0.504035	0.126982
208	2020	1	Henan	0	1	0	0	1	1.41093	2.62012	5.20916	0.369475	0.433656	0.877743	0.844056	0.167518	15.3784	0.62	0.308758	0.229488	0.4732	1.17371	0.532832	0.15723
209	2013	0	Henan	0	1	0	0	1	0.6725	1.7903	5.05352	0.40635	0.307223	0.691232	0.385277	0.211951	13.7731	0.72	0.312316	0.142106	0.288	0.756056	0.704877	0.11255
209	2014	0	Henan	0	1	0	0	1	0.73553	1.92738	5.06217	0.427343	0.31557	0.706243	0.404331	0.204459	14.3059	0.74	0.305818	0.149153	0.3597	0.738446	0.601592	0.12361
209	2015	0	Henan	0	1	0	0	1	0.85609	2.04786	5.03601	0.423005	0.321986	0.771151	0.418816	0.207044	14.3534	0.77	0.292819	0.154227	0.3612	0.761187	0.602853	0.14206
209	2016	0	Henan	0	1	0	0	1	0.92732	2.15281	5.0448	0.422677	0.34387	0.815966	0.410312	0.229328	14.6387	0.77	0.292646	0.155053	0.3612	0.813553	0.552321	0.134439
209	2017	0	Henan	0	1	0	0	1	1.00077	2.31266	5.0448	0.419762	0.364384	0.837319	0.417444	0.243813	14.867	0.76	0.303436	0.165562	0.1956	0.868073	0.514227	0.134717
209	2018	0	Henan	0	1	0	0	1	1.06779	2.45856	5.06044	0.417501	0.384472	0.85479	0.404904	0.254317	15.0953	0.77	0.30594	0.200282	0.1956	0.920888	0.47428	0.142701
209	2019	0	Henan	0	1	0	0	1	1.13977	2.55978	5.04305	0.40587	0.411496	0.803387	0.366873	0.223332	15.3237	0.7721	0.308318	0.208187	0.1956	1.01386	0.449982	0.154389
209	2020	1	Henan	0	1	0	0	1	1.18669	2.51395	5.00733	0.393844	0.406666	0.900105	0.427433	0.222519	15.552	0.78	0.303954	0.222821	0.2602	1.03256	0.506521	0.166896
210	2013	0	Henan	0	1	0	0	1	0.6352	1.7412	5.59512	0.433216	0.222226	0.763845	0.214045	0.209183	14.5943	1.2	0.607407	0.273379	0.4134	0.512967	0.795349	0.135166
210	2014	0	Henan	0	1	0	0	1	0.68508	1.86418	5.59915	0.432966	0.248795	0.812745	0.241246	0.202731	14.5943	1.23	0.555571	0.305746	0.4134	0.574628	0.735022	0.160162
210	2015	0	Henan	0	1	0	0	1	0.77811	1.96765	5.59915	0.434852	0.256275	0.897678	0.268652	0.238388	14.9397	1.23	0.442335	0.315273	0.4134	0.589339	0.710293	0.147787
210	2016	0	Henan	0	1	0	0	1	0.82685	2.06574	5.60016	0.463596	0.296619	0.981962	0.275733	0.258661	15.0586	3.2	0.440761	0.290573	0.4134	0.639822	0.517227	0.145142
210	2017	0	Henan	0	1	0	0	1	0.89509	2.21101	5.59512	0.459463	0.327647	1.01918	0.248039	0.243732	15.2252	0.98	0.542907	0.32523	0.1817	0.71311	0.463345	0.153749
210	2018	0	Henan	0	1	0	0	1	0.95463	2.35466	5.58088	0.458635	0.345771	1.03971	0.308889	0.256502	15.3918	2.46	0.539095	0.41989	0.3986	0.753913	0.426461	0.147663
210	2019	1	Henan	0	1	0	0	1	1.01709	2.45847	5.57883	0.436348	0.371587	1.01055	0.34648	0.246546	15.5584	1.26	0.535083	0.411759	0.3265	0.851584	0.440166	0.149873
210	2020	1	Henan	0	1	0	0	1	1.04613	2.41803	5.63957	0.413755	0.373881	1.10329	0.447853	0.288224	15.7249	2.05	0.531995	0.426854	0.299	0.903629	0.513261	0.140232
211	2013	0	Henan	0	1	0	0	1	0.6512	1.7367	5.49758	0.400259	0.253993	0.691074	0.257742	0.19763	14.7998	1.24	0.55362	0.22197	0.3256	0.634572	0.863811	0.154058
211	2014	0	Henan	0	1	0	0	1	0.71158	1.8629	5.49424	0.421123	0.279764	0.698244	0.229354	0.178236	14.7998	1.26	0.523436	0.232055	0.3256	0.664328	0.710276	0.161318
211	2015	0	Henan	0	1	0	0	1	0.80136	1.96368	5.49424	0.408836	0.302366	0.781834	0.225125	0.200131	15.1287	1.29	0.440499	0.246656	0.3267	0.739578	0.706389	0.154553
211	2016	0	Henan	0	1	0	0	1	0.85156	2.06156	5.49536	0.409528	0.317951	0.817506	0.220594	0.206024	15.2515	0.89	0.427476	0.283271	0.3267	0.776386	0.665451	0.135736
211	2017	0	Henan	0	1	0	0	1	0.92182	2.20661	5.49088	0.420568	0.340661	0.856879	0.243437	0.198529	15.5842	0.92	0.487054	0.253501	0.3267	0.810002	0.567735	0.139568
211	2018	0	Henan	0	1	0	0	1	0.98315	2.33256	5.47734	0.420923	0.358365	0.897433	0.275441	0.21017	15.9168	0.94	0.459924	0.367747	0.3221	0.85138	0.524388	0.132937
211	2019	1	Henan	0	1	0	0	1	1.04843	2.44147	5.47392	0.429216	0.388913	0.971097	0.341001	0.200798	16.2493	0.95	0.454741	0.361276	0.2739	0.9061	0.423728	0.132986
211	2020	1	Henan	0	1	0	0	1	1.07845	2.38718	5.56539	0.408586	0.393513	0.996489	0.354176	0.224314	16.5817	0.95	0.446998	0.37894	0.3549	0.963109	0.484355	0.126322
212	2013	0	Henan	0	1	0	0	1	0.6474	1.7326	5.55808	0.490595	0.290144	0.754848	0.357533	0.201818	14.8382	0.89	0.538114	0.266912	0.4807	0.591412	0.44693	0.212927
212	2014	0	Henan	0	1	0	0	1	0.70873	1.8737	5.56226	0.466995	0.325073	0.787442	0.433202	0.18758	14.8382	0.92	0.479768	0.276353	0.4807	0.696096	0.445257	0.265506
212	2015	0	Henan	0	1	0	0	1	0.81327	1.98063	5.56226	0.455907	0.343003	0.854525	0.475703	0.202841	15.1525	0.95	0.454728	0.283709	0.4807	0.752353	0.441076	0.265661
212	2016	0	Henan	0	1	0	0	1	0.86582	2.08209	5.56435	0.451102	0.360825	0.875024	0.484597	0.212265	15.2718	0.99	0.481128	0.292586	0.4836	0.799875	0.416918	0.241994
212	2017	0	Henan	0	1	0	0	1	0.93776	2.23061	5.55913	0.445736	0.380577	0.896251	0.547457	0.20385	15.3967	1.02	0.484701	0.326272	0.4836	0.853816	0.389662	0.245736
212	2018	1	Henan	0	1	0	0	1	1.00112	2.37584	5.53582	0.44003	0.401098	0.902879	0.532102	0.231554	15.5045	0.93	0.484533	0.369622	0.0599	0.911526	0.361035	0.218198
212	2019	1	Henan	0	1	0	0	1	1.06819	2.48821	5.53367	0.421305	0.423664	0.857636	0.534634	0.19841	15.5978	0.836	0.487907	0.392101	0.0633	1.0056	0.367979	0.234047
212	2020	1	Henan	0	1	0	0	1	1.09974	2.43828	5.55913	0.401831	0.42599	0.962486	0.583348	0.193369	15.6783	0.87	0.482659	0.413518	0.3683	1.06012	0.428486	0.23931
213	2013	0	Henan	0	1	0	0	1	0.6987	1.7725	5.55703	0.545715	0.189419	0.680221	0.333844	0.193407	15.1318	1.59	0.643305	0.275602	0.2887	0.347103	0.485356	0.180468
213	2014	0	Henan	0	1	0	0	1	0.76428	1.91168	5.5486	0.484855	0.263903	0.757737	0.340381	0.199542	15.1318	1.62	0.591769	0.329499	0.2982	0.544291	0.51818	0.205112
213	2015	0	Henan	0	1	0	0	1	0.84437	2.00737	5.54966	0.478936	0.277486	0.840514	0.320116	0.226853	15.3084	1.62	0.512187	0.352391	0.302	0.579382	0.508582	0.190662
213	2016	0	Henan	0	1	0	0	1	0.89804	2.10937	5.55071	0.480101	0.290383	0.870508	0.261367	0.219618	15.4356	1.66	0.50167	0.363101	0.3015	0.604838	0.478056	0.19723
213	2017	0	Henan	0	1	0	0	1	0.97217	2.2578	5.54542	0.48125	0.310389	0.920429	0.268568	0.209754	15.5603	1.66	0.620636	0.362169	0.3026	0.644965	0.432958	0.200867
213	2018	0	Henan	0	1	0	0	1	1.0379	2.39364	5.56122	0.474226	0.334001	0.955005	0.281493	0.227638	15.6802	1.4	0.635111	0.427513	0.1532	0.704307	0.404356	0.18591
213	2019	1	Henan	0	1	0	0	1	1.10674	2.50138	5.55703	0.470293	0.3705	0.95126	0.302776	0.217136	15.7955	1.14	0.653314	0.44295	0.3439	0.787808	0.338528	0.168602
213	2020	1	Henan	0	1	0	0	1	1.13835	2.45336	5.60517	0.4343	0.375033	0.96476	0.33202	0.214994	15.9065	0.98	0.651333	0.496843	0.3199	0.863534	0.439022	0.168991
214	2013	0	Henan	0	1	0	0	1	0.6903	1.6992	5.66438	0.451142	0.251977	0.809363	0.263075	0.229379	14.7951	1.8	0.627825	0.30068	0.3078	0.558531	0.658065	0.171115
214	2014	0	Henan	0	1	0	0	1	0.75505	1.83101	5.66155	0.420345	0.311226	0.815188	0.309621	0.229592	14.7951	1.83	0.586914	0.31316	0.3078	0.740404	0.638592	0.179005
214	2015	0	Henan	0	1	0	0	1	0.85018	1.92929	5.66155	0.41256	0.322985	0.885081	0.326225	0.232797	15.2134	1.8	0.596066	0.4104	0.3078	0.78288	0.64101	0.185397
214	2016	0	Henan	0	1	0	0	1	0.90422	2.02259	5.6625	0.411352	0.339205	0.910516	0.208646	0.220522	15.3961	1.6	0.58755	0.423578	0.3078	0.824608	0.606397	0.187409
214	2017	0	Henan	0	1	0	0	1	0.97939	2.16685	5.65776	0.418496	0.363815	0.937474	0.349858	0.224862	15.6	1.63	0.58667	0.513467	0.3078	0.86934	0.520171	0.177597
214	2018	0	Henan	0	1	0	0	1	1.04367	2.29927	5.63667	0.415538	0.386292	0.94385	0.35744	0.259102	15.7889	1.67	0.586393	0.538932	0.306	0.929619	0.476874	0.153938
214	2019	1	Henan	0	1	0	0	1	1.11092	2.4007	5.63279	0.413547	0.419733	0.871105	0.358606	0.208202	15.9641	1.71	0.596042	0.576027	0.4135	1.01496	0.403147	0.157101
214	2020	1	Henan	0	1	0	0	1	1.14266	2.34839	5.74406	0.377235	0.422	0.888911	0.367833	0.199219	16.1265	1.73	0.595551	0.613795	0.4265	1.11867	0.5322	0.170783
215	2013	0	Henan	0	1	0	0	1	0.7125	1.7808	5.60717	0.394264	0.373891	0.949934	0.416451	0.21214	14.3771	1.57	0.628036	0.22343	0.5129	0.948326	0.588044	0.116517
215	2014	0	Henan	0	1	0	0	1	0.77821	1.92316	5.59512	0.405808	0.367063	1.09546	0.504588	0.223227	14.6444	1.6	0.521936	0.238895	0.526	0.904523	0.559695	0.130712
215	2015	0	Henan	0	1	0	0	1	0.859	2.03004	5.58904	0.394306	0.386459	1.16765	0.508231	0.23472	14.7971	1.63	0.50038	0.268576	0.5265	0.980099	0.556001	0.130367
215	2016	0	Henan	0	1	0	0	1	0.91781	2.14559	5.58395	0.392126	0.403856	1.18126	0.449003	0.241089	14.9151	1.63	0.505372	0.299534	0.53	1.02991	0.520288	0.128853
215	2017	0	Henan	0	1	0	0	1	0.99233	2.31125	5.57677	0.402094	0.414282	1.21984	0.465691	0.242107	15.0955	1.63	0.500246	0.369385	0.531	1.03031	0.456668	0.123507
215	2018	0	Henan	0	1	0	0	1	1.05835	2.45324	5.57985	0.393476	0.432893	1.26424	0.460868	0.256289	15.2736	1.57	0.499161	0.373583	0.531	1.10018	0.44125	0.130089
215	2019	0	Henan	0	1	0	0	1	1.12971	2.55658	5.57883	0.40895	0.407742	1.32034	0.483091	0.274085	15.4492	1.5198	0.482337	0.470154	0.4124	0.997047	0.44824	0.140618
215	2020	1	Henan	0	1	0	0	1	1.1642	2.50584	5.61016	0.400763	0.408803	1.45341	0.523191	0.275709	15.6225	1.5143	0.577647	0.436723	0.3812	1.02006	0.475178	0.143283
216	2013	0	Henan	0	1	0	0	1	0.7439	1.8178	5.27249	0.458606	0.291843	0.814483	0.252273	0.179876	14.363	1.65	0.419508	0.269072	0.2328	0.636369	0.544152	0.190541
216	2014	0	Henan	0	1	0	0	1	0.81325	1.96742	5.27249	0.4402	0.337275	0.833112	0.291103	0.178153	14.8892	1.68	0.38908	0.326993	0.2297	0.766186	0.505507	0.198831
216	2015	0	Henan	0	1	0	0	1	0.89446	2.08245	5.27249	0.430376	0.354923	0.901733	0.345227	0.190472	15.0899	1.7	0.362749	0.332335	0.2297	0.824679	0.498868	0.196099
216	2016	0	Henan	0	1	0	0	1	0.95393	2.19844	5.27528	0.422645	0.378087	0.936797	0.370749	0.180982	15.262	1.74	0.367505	0.268474	0.2494	0.894575	0.471479	0.205873
216	2017	0	Henan	0	1	0	0	1	1.03415	2.37051	5.27944	0.432996	0.389931	0.965985	0.4106	0.190114	15.4717	1.61	0.378061	0.312166	0.2512	0.900542	0.408948	0.197548
216	2018	0	Henan	0	1	0	0	1	1.10301	2.51789	5.2683	0.427957	0.406674	0.983993	0.477338	0.210894	15.6731	1.64	0.395522	0.44059	0.2652	0.950268	0.386404	0.196212
216	2019	0	Henan	0	1	0	0	1	1.17725	2.62646	5.26409	0.418014	0.408916	1.03157	0.536346	0.216048	15.8665	1.6693	0.415974	0.443688	0.2746	0.978236	0.414031	0.205741
216	2020	1	Henan	0	1	0	0	1	1.21436	2.5841	5.28772	0.408113	0.406963	1.1251	0.614368	0.197473	16.0521	1.68	0.424541	0.493449	0.2738	0.997183	0.45312	0.237845
217	2013	0	Henan	0	1	0	0	1	0.731	1.7914	4.66356	0.46394	0.273374	0.716164	0.311201	0.164194	14.2836	1.1	0.237662	0.167941	0.2234	0.589244	0.566206	0.236734
217	2014	0	Henan	0	1	0	0	1	0.78989	1.93749	4.69387	0.422785	0.335134	0.757487	0.355096	0.165773	14.3653	1.12	0.240912	0.174077	0.2367	0.792683	0.572587	0.258601
217	2015	0	Henan	0	1	0	0	1	0.86782	2.04515	4.69635	0.412661	0.357837	0.840094	0.369799	0.168537	14.5085	1.13	0.246044	0.190774	0.26	0.867145	0.556152	0.274543
217	2016	0	Henan	0	1	0	0	1	0.92561	2.15794	4.69138	0.408057	0.379282	0.892979	0.385489	0.175684	14.6342	0.94	0.206227	0.177641	0.1194	0.929482	0.521154	0.279176
217	2017	0	Henan	0	1	0	0	1	0.99983	2.32034	4.69138	0.409643	0.401913	0.919542	0.411335	0.169657	14.7553	0.97	0.247888	0.195576	0.2445	0.981131	0.460021	0.293434
217	2018	0	Henan	0	1	0	0	1	1.06532	2.44499	4.69883	0.398343	0.425401	0.950738	0.437331	0.174479	14.8701	1	0.238327	0.195247	0.2933	1.06793	0.442484	0.330539
217	2019	0	Henan	0	1	0	0	1	1.13825	2.55266	4.69635	0.380685	0.418301	1.07959	0.567121	0.196046	14.979	1.0283	0.234774	0.21196	0.2726	1.09881	0.528032	0.342093
217	2020	1	Henan	0	1	0	0	1	1.17627	2.50412	4.69635	0.360224	0.398832	1.17797	0.625276	0.209883	15.0822	1.03	0.227225	0.217698	0.3542	1.10718	0.668874	0.331138
218	2013	0	Henan	0	1	0	0	1	0.7148	1.7055	5.41763	0.382299	0.281594	0.778435	0.304997	0.241233	14.2296	1.58	0.529517	0.199262	0.2088	0.73658	0.879174	0.127366
218	2014	0	Henan	0	1	0	0	1	0.78587	1.84946	5.41401	0.382165	0.309416	0.822103	0.322107	0.292964	14.3595	1.63	0.469929	0.207398	0.2008	0.80964	0.807204	0.125806
218	2015	0	Henan	0	1	0	0	1	0.90908	1.93481	5.41884	0.349034	0.363648	0.918214	0.390115	0.296576	14.1611	1.64	0.437087	0.233068	0.2108	1.04187	0.823001	0.130364
218	2016	0	Henan	0	1	0	0	1	0.966	2.02183	5.42245	0.337405	0.387762	0.984674	0.442902	0.286887	14.5492	1.32	0.390336	0.242275	0.2529	1.14925	0.81472	0.126681
218	2017	0	Henan	0	1	0	0	1	1.04634	2.17398	5.4332	0.343518	0.416689	1.07081	0.456201	0.268451	14.702	1.35	0.393509	0.327394	0.2357	1.213	0.698052	0.136393
218	2018	1	Henan	0	1	0	0	1	1.11749	2.30688	5.43082	0.334379	0.438169	1.08694	0.567072	0.25731	14.8471	1.451	0.396829	0.340743	0.2242	1.31039	0.680222	0.185649
218	2019	1	Henan	0	1	0	0	1	1.1922	2.41414	5.42245	0.314013	0.499357	0.943581	0.579835	0.211938	14.985	1.4475	0.427356	0.34922	0.2242	1.59024	0.594339	0.209705
218	2020	1	Henan	0	1	0	0	1	1.22685	2.37442	5.41159	0.301687	0.501303	1.05509	0.648328	0.220646	15.1161	1.45	0.413037	0.403033	0.2242	1.66167	0.653029	0.213583
219	2013	0	Hubei	0	1	0	0	1	0.6362	1.483	5.40916	0.362087	0.351986	0.648429	0.318836	0.193446	14.1623	0.47	0.435179	0.251563	0.2072	0.972103	0.789712	0.25844
219	2014	0	Hubei	0	1	0	0	1	0.82147	1.7549	5.41037	0.345519	0.360239	0.750097	0.40038	0.207949	14.3254	0.52	0.435231	0.267279	0.2073	1.0426	0.834598	0.267395
219	2015	0	Hubei	0	1	0	0	1	0.89493	1.92756	5.41643	0.31371	0.389509	0.786721	0.473327	0.289786	14.2635	0.56	0.404525	0.295954	0.2098	1.24162	0.933627	0.228385
219	2016	0	Hubei	0	1	0	0	1	0.94993	2.07434	5.41956	0.297625	0.385197	0.821444	0.530206	0.265642	14.3072	0.59	0.377341	0.311568	0.212	1.29423	0.972898	0.254054
219	2017	0	Hubei	0	1	0	0	1	1.01976	2.23433	5.42161	0.39453	0.361656	0.741365	0.575158	0.224153	14.3425	0.62	0.380977	0.32455	0.2145	0.916675	0.506358	0.267953
219	2018	0	Hubei	0	1	0	0	1	1.091	2.37911	5.43367	0.473534	0.351473	0.737478	0.592085	0.217226	14.3735	0.65	0.414772	0.339821	0.2193	0.742235	0.369547	0.269581
219	2019	1	Hubei	0	1	0	0	1	1.16431	2.53071	5.443	0.374755	0.438763	0.795028	0.649003	0.220855	14.4009	0.68	0.440963	0.397932	0.2241	1.1708	0.497611	0.283143
219	2020	1	Hubei	0	1	0	0	1	1.14633	2.49895	5.50203	0.330566	0.446065	0.930552	0.810223	0.239902	14.425	0.71	0.46055	0.417152	0.25	1.3494	0.675719	0.220616
220	2013	0	Hubei	0	1	0	0	1	0.6203	1.2902	5.02892	0.335454	0.334231	0.956061	0.531106	0.400299	14.1307	0.37	0.122158	0.132392	0.3125	0.996356	0.984706	0.290268
220	2014	0	Hubei	0	1	0	0	1	0.69	1.985	5.03069	0.399518	0.291063	0.976079	0.573116	0.419278	14.4051	0.38	0.125037	0.169434	0.1854	0.728534	0.77462	0.17284
220	2015	0	Hubei	0	1	0	0	1	0.75161	2.11173	5.03247	0.391233	0.322258	1.01942	0.665315	0.416459	14.4818	0.4	0.129507	0.236625	0.1867	0.823698	0.751448	0.185954
220	2016	0	Hubei	0	1	0	0	1	0.80408	2.24051	5.03936	0.398062	0.310012	1.06158	0.796786	0.386857	14.5783	0.4	0.131858	0.247344	0.1871	0.778802	0.733464	0.20851
220	2017	0	Hubei	0	1	0	0	1	0.87	2.41946	5.05074	0.40599	0.3748	1.06654	0.862472	0.353195	14.7175	0.4153	0.092253	0.246531	0.2579	0.923175	0.576168	0.236663
220	2018	0	Hubei	0	1	0	0	1	0.93781	2.55778	5.0476	0.401745	0.378763	1.07944	0.982723	0.420837	14.8468	0.4165	0.146254	0.253411	0.4758	0.942796	0.546346	0.198535
220	2019	0	Hubei	0	1	0	0	1	1.00649	2.70562	5.04603	0.45973	0.367831	0.869169	0.804885	0.300885	14.9669	0.4169	0.155489	0.256061	0.4817	0.800102	0.375089	0.207122
220	2020	1	Hubei	0	1	0	0	1	1.00848	2.5514	4.67681	0.427816	0.378469	0.987588	0.94061	0.338539	15.0785	0.423	0.153338	0.276066	0.4583	0.884654	0.452802	0.136452
221	2013	0	Hubei	0	1	0	0	1	0.5992	1.3825	4.80888	0.286332	0.33429	1.28007	0.579381	0.266095	12.0974	0.31	0.111599	0.164664	0.2175	1.16749	1.32496	0.176973
221	2014	0	Hubei	0	1	0	0	1	0.66716	1.88167	4.80888	0.29336	0.346806	1.37999	0.571069	0.282859	12.4261	0.34	0.112457	0.171903	0.1915	1.18218	1.22659	0.179641
221	2015	0	Hubei	0	1	0	0	1	0.72515	2.0138	4.8111	0.284411	0.38222	1.50963	0.634794	0.322025	12.1064	0.36	0.099803	0.175407	0.193	1.3439	1.27192	0.173503
221	2016	0	Hubei	0	1	0	0	1	0.77696	2.12671	4.81903	0.279156	0.398543	1.64358	0.718055	0.464493	11.8174	0.35	0.105376	0.180525	0.193	1.42767	1.30017	0.12145
221	2017	0	Hubei	0	1	0	0	1	0.8403	2.3033	4.77414	0.280227	0.401085	1.75455	0.85509	0.459518	11.7615	0.36	0.111219	0.201739	0.193	1.43129	1.01478	0.124774
221	2018	0	Hubei	0	1	0	0	1	0.9053	2.43408	4.76723	0.310465	0.413994	1.93466	1.05748	0.506463	11.7585	0.35	0.13442	0.197535	0.2419	1.33347	0.887512	0.122695
221	2019	0	Hubei	0	1	0	0	1	0.97071	2.57738	4.76352	0.217722	0.537833	1.82676	1.05415	0.468945	11.7584	0.358	0.139804	0.199182	0.2419	2.47027	1.12273	0.117252
221	2020	1	Hubei	0	1	0	0	1	0.97725	2.42545	4.61362	0.202483	0.532492	2.02256	1.18691	0.537054	11.7584	0.364	0.14383	0.209292	0.3624	2.62981	1.30888	0.075119
222	2013	0	Hubei	0	1	0	0	1	0.5099	1.4582	4.72086	0.329671	0.332763	0.753106	0.930092	0.393663	12.9703	0.32	0.111555	0.157137	0.3986	1.00938	1.06901	0.199984
222	2014	0	Hubei	0	1	0	0	1	0.67647	1.85235	4.72086	0.403052	0.250902	0.831314	0.885743	0.398097	13.0676	0.35	0.113858	0.174809	0.3986	0.622505	0.858506	0.154452
222	2015	0	Hubei	0	1	0	0	1	0.73665	1.98444	4.72328	0.366646	0.324123	0.82164	0.832141	0.421484	13.0531	0.36	0.118364	0.185372	0.3986	0.884022	0.843402	0.14322
222	2016	0	Hubei	0	1	0	0	1	0.78953	2.10232	4.7305	0.361034	0.325806	0.848123	0.797751	0.368779	13.1088	0.26	0.121493	0.201896	0.4094	0.902426	0.867399	0.209205
222	2017	0	Hubei	0	1	0	0	1	0.85938	2.26523	4.73957	0.355973	0.364767	1.00707	0.90133	0.367403	13.1862	0.26	0.125227	0.19455	0.2338	1.0247	0.784619	0.241206
222	2018	0	Hubei	0	1	0	0	1	0.92311	2.39628	4.73314	0.400733	0.348793	1.0121	0.850965	0.381618	13.2592	0.25	0.128395	0.214745	0.1808	0.870388	0.625041	0.15522
222	2019	0	Hubei	0	1	0	0	1	0.98719	2.53549	4.73002	0.355676	0.387576	1.10725	0.91601	0.39413	13.3281	0.24	0.130272	0.213124	0.1935	1.08969	0.721858	0.144982
222	2020	1	Hubei	0	1	0	0	1	0.98435	2.45223	4.54414	0.335778	0.390427	1.24469	1.01643	0.436196	13.393	0.243	0.131687	0.215309	0.1975	1.16276	0.815402	0.096907
223	2013	0	Hubei	0	1	0	0	1	0.5105	1.3143	4.43399	0.383263	0.245578	0.849057	0.473478	0.427184	12.6014	0.28	0.096526	0.104426	0.3789	0.640758	0.968233	0.177506
223	2014	0	Hubei	0	1	0	0	1	0.66843	1.81441	4.43721	0.394241	0.255231	0.927633	0.518249	0.265268	12.7948	0.28	0.094886	0.112644	0.3683	0.647398	0.889271	0.230976
223	2015	0	Hubei	0	1	0	0	1	0.72911	1.93877	4.44042	0.403611	0.256205	0.948879	0.591001	0.465696	12.813	0.02	0.091606	0.157297	0.3789	0.634782	0.842909	0.140235
223	2016	0	Hubei	0	1	0	0	1	0.78253	2.05544	4.44649	0.402121	0.267937	0.98011	0.627286	0.431331	12.8994	0.02	0.094338	0.169527	0.3378	0.66631	0.820591	0.138725
223	2017	0	Hubei	0	1	0	0	1	0.84859	2.21794	4.45505	0.429699	0.261697	1.06735	0.722444	0.539389	12.9508	0.03	0.098621	0.171641	0.2532	0.609024	0.626485	0.11263
223	2018	0	Hubei	0	1	0	0	1	0.91233	2.36003	4.4503	0.430045	0.310965	1.15725	0.837999	0.443305	12.9939	0.02	0.100443	0.170362	0.2727	0.723098	0.602241	0.141701
223	2019	0	Hubei	0	1	0	0	1	0.97806	2.50149	4.44681	0.228915	0.497162	1.33319	0.888622	0.459406	13.0301	0.03	0.102663	0.177227	0.2682	2.17182	1.19661	0.135534
223	2020	1	Hubei	0	1	0	0	1	0.97049	2.42417	4.34498	0.209739	0.496819	1.44375	1.0042	0.468816	13.0604	0.024	0.104447	0.1862	0.2682	2.36875	1.39908	0.094547
224	2013	0	Hubei	0	1	0	0	1	0.608	1.5521	4.67377	0.30194	0.297027	1.0468	0.674842	0.446366	13.2217	0.31	0.136941	0.147667	0.3012	0.98373	1.32845	0.147311
224	2014	0	Hubei	0	1	0	0	1	0.67431	1.9498	4.67377	0.306242	0.30122	1.14587	0.836087	0.45493	13.2358	0.38	0.087002	0.187876	0.239	0.983599	1.28195	0.133678
224	2015	0	Hubei	0	1	0	0	1	0.73317	2.08807	4.67883	0.307811	0.349344	1.18577	0.935427	0.436981	13.3741	0.38	0.108939	0.214248	0.1203	1.13493	1.24559	0.199107
224	2016	0	Hubei	0	1	0	0	1	0.7849	2.2148	4.68587	0.254727	0.362034	1.22774	0.903342	0.457651	13.1735	0.38	0.114064	0.228814	0.1521	1.42126	1.54809	0.14358
224	2017	0	Hubei	0	1	0	0	1	0.85008	2.38818	4.69461	0.328805	0.352892	1.24755	0.936993	0.454772	13.0866	0.43	0.118023	0.226177	0.1521	1.07326	1.03335	0.147207
224	2018	0	Hubei	0	1	0	0	1	0.91735	2.52921	4.69163	0.332098	0.35806	1.27817	1.00952	0.486915	13.0124	0.47	0.12153	0.250981	0.1921	1.07818	0.932984	0.141957
224	2019	0	Hubei	0	1	0	0	1	0.98382	2.67985	4.68963	0.275229	0.457311	1.21277	0.922014	0.448706	12.949	0.46	0.125363	0.248602	0.2782	1.66157	0.971772	0.137914
224	2020	1	Hubei	0	1	0	0	1	0.98384	2.54524	4.61038	0.240375	0.461881	1.38127	1.06748	0.519727	12.895	0.463	0.127434	0.269278	0.2462	1.9215	1.23866	0.093744
225	2013	0	Hubei	0	1	0	0	1	0.6778	1.7185	4.79997	0.508936	0.326816	0.767978	0.796126	0.284987	14.6667	0.31	0.118276	0.223313	0.333	0.642155	0.322663	0.515595
225	2014	0	Hubei	0	1	0	0	1	0.75765	2.05902	4.79098	0.506537	0.338472	0.798348	0.796058	0.1879	14.765	0.32	0.119506	0.239013	0.3451	0.668209	0.305984	0.370231
225	2015	0	Hubei	0	1	0	0	1	0.82597	2.20443	4.79324	0.507101	0.350531	0.814552	0.781399	0.228241	14.876	0.33	0.119414	0.271637	0.3117	0.691244	0.291389	0.317837
225	2016	0	Hubei	0	1	0	0	1	0.88537	2.33645	4.79706	0.496756	0.358917	0.839189	0.775298	0.22416	14.9461	0.23	0.128063	0.261433	0.3465	0.722521	0.290575	0.290784
225	2017	0	Hubei	0	1	0	0	1	0.96121	2.52445	4.80488	0.503111	0.364005	0.829914	0.830692	0.215806	15.1071	0.24	0.12824	0.262165	0.2483	0.723509	0.249519	0.307159
225	2018	0	Hubei	0	1	0	0	1	1.03805	2.67967	4.79908	0.513021	0.369981	0.807958	0.79129	0.200675	15.2681	0.226	0.131267	0.26556	0.2573	0.721181	0.228056	0.264006
225	2019	1	Hubei	0	1	0	0	1	1.11365	2.83589	4.79639	0.430387	0.464286	0.756809	0.732201	0.174118	15.4291	0.23	0.140025	0.26934	0.3243	1.07876	0.244725	0.24711
225	2020	1	Hubei	0	1	0	0	1	1.11903	2.67145	4.71333	0.38929	0.486247	0.973083	0.878306	0.210938	15.59	0.22	0.141876	0.295746	0.3703	1.24906	0.319719	0.159906
226	2013	0	Hubei	0	1	0	0	1	0.6467	1.6306	4.58629	0.391058	0.392222	0.623629	0.893169	0.253892	13.8137	0.19	0.071862	0.132275	0.226	1.00298	0.554065	0.267644
226	2014	0	Hubei	0	1	0	0	1	0.71922	1.95461	4.58629	0.393147	0.400894	0.671205	0.993954	0.23709	13.9735	0.21	0.069607	0.168792	0.226	1.0197	0.524721	0.32879
226	2015	0	Hubei	0	1	0	0	1	0.77856	2.10622	4.58906	0.392114	0.416917	0.70644	0.720928	0.252975	14.1338	0.21	0.068791	0.2131	0.226	1.06326	0.504865	0.353278
226	2016	0	Hubei	0	1	0	0	1	0.83414	2.24249	4.58989	0.378178	0.419261	0.753234	0.715689	0.255248	14.2496	0.16	0.067317	0.224698	0.2324	1.10863	0.535668	0.242119
226	2017	0	Hubei	0	1	0	0	1	0.90053	2.4041	4.59072	0.35794	0.429779	0.822096	0.887713	0.279856	14.3715	0.166	0.065947	0.225642	0.2335	1.2007	0.594938	0.217468
226	2018	0	Hubei	0	1	0	0	1	0.96154	2.54674	4.58712	0.389073	0.417899	0.791817	0.915621	0.271513	14.4892	0.169	0.06536	0.189598	0.1666	1.07409	0.496125	0.211692
226	2019	1	Hubei	0	1	0	0	1	1.02695	2.70261	4.56671	0.364659	0.462064	0.732238	0.791228	0.222273	14.6029	0.174	0.064128	0.196069	0.1545	1.26711	0.475173	0.218815
226	2020	1	Hubei	0	1	0	0	1	1.02097	2.53284	4.4327	0.317816	0.484368	0.894563	0.9514	0.26793	14.7128	0.1749	0.063563	0.197014	0.1245	1.52405	0.622422	0.093662
227	2013	0	Hubei	0	1	0	0	1	0.6571	1.7215	4.68888	0.307419	0.374716	0.650377	0.480812	0.24662	13.5729	0.21	0.078853	0.133081	0.1504	1.21891	1.03396	0.232748
227	2014	0	Hubei	0	1	0	0	1	0.7302	2.01765	4.68888	0.30589	0.389813	0.672552	0.538713	0.25929	13.6985	0.22	0.078031	0.141272	0.1505	1.27435	0.994668	0.255402
227	2015	0	Hubei	0	1	0	0	1	0.78686	2.17527	4.68888	0.31222	0.395702	0.707403	0.633658	0.255232	13.7861	0.23	0.075649	0.150108	0.1279	1.26738	0.935488	0.296313
227	2016	0	Hubei	0	1	0	0	1	0.83546	2.31508	4.66356	0.29128	0.412257	0.7554	0.706754	0.247796	13.9392	0.23	0.071653	0.156914	0.1505	1.41533	1.01787	0.232525
227	2017	0	Hubei	0	1	0	0	1	0.90164	2.46953	4.65894	0.285503	0.412907	0.827525	0.91797	0.253411	14.0304	0.24	0.069655	0.163029	0.1505	1.44624	0.957158	0.207904
227	2018	0	Hubei	0	1	0	0	1	0.96255	2.62443	4.65842	0.299342	0.43832	0.847987	1.04281	0.275089	14.1032	0.26	0.068777	0.167899	0.1504	1.46428	0.876379	0.191394
227	2019	0	Hubei	0	1	0	0	1	1.03359	2.79905	4.64284	0.278335	0.467358	0.849437	1.0923	0.284032	14.1613	0.28	0.067631	0.163545	0.1379	1.67912	0.913671	0.168837
227	2020	1	Hubei	0	1	0	0	1	1.02559	2.61515	4.51727	0.262775	0.475922	0.984554	1.30123	0.293875	14.2077	0.29	0.063176	0.176357	0.185	1.81114	0.9944	0.083015
228	2013	0	Hubei	0	1	0	0	1	0.6313	1.3585	3.99573	0.288525	0.364619	0.410607	0.37268	0.409709	12.8469	0.16	0.037864	0.058081	0.0471	1.26373	1.20201	0.112369
228	2014	0	Hubei	0	1	0	0	1	0.70235	1.83931	3.99573	0.291939	0.376612	0.664209	0.416422	0.47436	12.9322	0.17	0.031091	0.061441	0.076	1.29003	1.13556	0.111045
228	2015	0	Hubei	0	1	0	0	1	0.76098	1.98048	3.99573	0.290762	0.394463	0.717556	0.471796	0.368149	13.037	0.18	0.032016	0.064063	0.085	1.35665	1.10081	0.164155
228	2016	0	Hubei	0	1	0	0	1	0.81684	2.11423	3.94602	0.334236	0.333819	0.78972	0.599572	0.352053	13.1796	0.17	0.030403	0.063964	0.085	0.998754	0.993318	0.145583
228	2017	0	Hubei	0	1	0	0	1	0.88405	2.2737	3.95699	0.3137	0.344104	0.811927	0.678391	0.396633	13.3682	0.16	0.030451	0.068216	0.0748	1.09692	1.00119	0.12553
228	2018	0	Hubei	0	1	0	0	1	0.94356	2.40979	3.96011	0.342781	0.3652	0.81966	0.694958	0.437561	13.5567	0.16	0.03039	0.075727	0.0748	1.06541	0.851913	0.106826
228	2019	0	Hubei	0	1	0	0	1	1.01685	2.5935	3.94444	0.316354	0.409513	0.810785	0.670647	0.400348	13.7451	0.15	0.030203	0.077989	0.0748	1.29448	0.866535	0.103216
228	2020	1	Hubei	0	1	0	0	1	1.00412	2.41056	3.83923	0.282465	0.437014	0.9625	0.959316	0.414083	13.9335	0.154	0.030815	0.083459	0.0759	1.54714	0.993122	0.055081
229	2013	0	Hubei	0	1	0	0	1	0.7445	1.4806	4.2308	0.463519	0.33225	0.494936	0.399127	0.190119	13.5014	0.34	0.051723	0.13536	0.16	0.716799	0.439582	0.47115
229	2014	0	Hubei	0	1	0	0	1	0.82118	1.94284	4.22684	0.460958	0.334812	0.50331	0.458275	0.192535	13.6619	0.34	0.052784	0.136695	0.161	0.726339	0.44307	0.514657
229	2015	0	Hubei	0	1	0	0	1	0.88508	2.09656	4.2308	0.465969	0.346881	0.526639	0.478937	0.259662	13.8178	0.34	0.054142	0.149546	0.161	0.744429	0.417481	0.439795
229	2016	0	Hubei	0	1	0	0	1	0.94265	2.25213	4.23789	0.462456	0.345153	0.548369	0.480394	0.271479	13.964	0.27	0.055344	0.196388	0.1429	0.746348	0.41605	0.3461
229	2017	0	Hubei	0	1	0	0	1	1.01641	2.41294	4.24493	0.462224	0.344677	0.59582	0.540105	0.271499	14.1035	0.28	0.056543	0.146576	0.1387	0.745692	0.372956	0.315354
229	2018	0	Hubei	0	1	0	0	1	1.08817	2.5817	4.2496	0.481083	0.358216	0.626167	0.585946	0.283197	14.2277	0.27	0.057748	0.148297	0.1084	0.744602	0.334041	0.262459
229	2019	1	Hubei	0	1	0	0	1	1.16298	2.75672	4.2527	0.437434	0.400139	0.665871	0.604535	0.278157	14.3385	0.2741	0.057681	0.150058	0.198	0.91474	0.371318	0.252824
229	2020	1	Hubei	0	1	0	0	1	1.12143	2.68745	4.10727	0.410567	0.392266	0.806593	0.729957	0.306219	14.4372	0.2743	0.058046	0.151772	0.199	0.955425	0.480231	0.12907
230	2013	0	Hubei	0	1	0	0	1	0.7092	1.8053	5.08429	0.319213	0.379146	0.868101	0.303479	0.222838	13.2855	0.28	0.15228	0.178871	0.2959	1.18775	0.944981	0.342848
230	2014	0	Hubei	0	1	0	0	1	0.76216	2.02157	5.08429	0.326052	0.377724	0.966131	0.404202	0.250835	12.8396	0.29	0.146542	0.190066	0.2874	1.15848	0.911816	0.327992
230	2015	0	Hubei	0	1	0	0	1	0.82472	2.17933	5.08766	0.35655	0.360832	1.01642	0.46528	0.241583	13.0663	0.31	0.141081	0.20675	0.2849	1.01201	0.792687	0.455913
230	2016	0	Hubei	0	1	0	0	1	0.8677	2.30667	5.09101	0.328799	0.385229	1.07153	0.539506	0.3109	13.138	0.32	0.141432	0.20789	0.1279	1.17162	0.869686	0.261688
230	2017	0	Hubei	0	1	0	0	1	0.93487	2.45548	5.09251	0.343256	0.371102	1.11387	0.588807	0.325729	13.1927	0.34	0.150749	0.211838	0.2109	1.08112	0.812027	0.243975
230	2018	0	Hubei	0	1	0	0	1	1.0039	2.60051	5.09351	0.353545	0.385322	1.12195	0.602384	0.325257	13.2342	0.36	0.150724	0.212148	0.1951	1.08988	0.738616	0.249298
230	2019	0	Hubei	0	1	0	0	1	1.07433	2.75211	5.09368	0.190011	0.548665	1.14732	0.660212	0.337828	13.2658	0.38	0.153549	0.226085	0.1951	2.88755	1.37532	0.227031
230	2020	1	Hubei	0	1	0	0	1	1.03501	2.62978	4.87826	0.22319	0.485527	1.3094	0.808357	0.352542	13.2897	0.4	0.156077	0.234967	0.2291	2.1754	1.30509	0.151416
231	2013	0	Hubei	0	1	0	0	1	0.7261	1.79	5.1239	0.272427	0.444542	0.83877	0.357921	0.146565	13.426	0.22	0.15509	0.103009	0.218	1.63179	1.03875	0.442919
231	2014	0	Hubei	0	1	0	0	1	0.7801	2.04373	5.12552	0.283215	0.438287	0.935001	0.461058	0.207802	13.5094	0.23	0.14859	0.135265	0.2114	1.54754	0.992964	0.345946
231	2015	0	Hubei	0	1	0	0	1	0.84423	2.20212	5.12713	0.282359	0.444553	0.995048	0.577636	0.237324	13.5871	0.23	0.153084	0.184442	0.2134	1.57442	0.967126	0.312368
231	2016	0	Hubei	0	1	0	0	1	0.88858	2.3304	5.13228	0.281164	0.450847	1.06293	0.615329	0.364494	13.6586	0.23	0.158378	0.184442	0.2134	1.6035	0.953048	0.203252
231	2017	0	Hubei	0	1	0	0	1	0.9574	2.48024	5.13373	0.285603	0.452188	1.08899	0.644938	0.30192	13.7286	0.25	0.162624	0.234596	0.2134	1.58328	0.911106	0.231222
231	2018	0	Hubei	0	1	0	0	1	1.03157	2.62324	5.13469	0.30321	0.454039	1.10278	0.677234	0.028124	13.7908	0.26	0.168224	0.241176	0.1238	1.49744	0.800602	1.03684
231	2019	0	Hubei	0	1	0	0	1	1.10338	2.78001	5.13485	0.287937	0.492331	1.03621	0.634139	0.257094	13.846	0.28	0.14229	0.251446	0.1267	1.70986	0.763128	0.239806
231	2020	1	Hubei	0	1	0	0	1	1.06299	2.65374	4.88404	0.23115	0.507946	1.2515	0.769026	0.28805	13.895	0.29	0.181047	0.253137	0.3126	2.19748	1.12873	0.164856
232	2013	0	Hubei	0	1	0	0	1	0.7707	1.6598	4.53223	0.542678	0.215517	0.740126	0.541092	0.277552	13.4629	0.23	0.084933	0.106846	0.0832	0.397136	0.437389	0.200168
232	2014	0	Hubei	0	1	0	0	1	0.84657	1.86157	4.5293	0.55564	0.224353	0.778698	0.593379	0.279831	13.5974	0.25	0.079303	0.117784	0.0902	0.403775	0.39602	0.215306
232	2015	0	Hubei	0	1	0	0	1	0.91047	1.99893	4.53515	0.562224	0.231438	0.859971	0.666452	0.310881	13.4649	0.256	0.069969	0.134304	0.093	0.411647	0.367046	0.212172
232	2016	0	Hubei	0	1	0	0	1	0.96827	2.14722	4.53864	0.555859	0.244017	0.999913	0.78651	0.337077	13.463	0.257	0.071572	0.134304	0.1387	0.438992	0.360051	0.19448
232	2017	0	Hubei	0	1	0	0	1	1.04368	2.28375	4.54356	0.616655	0.216891	0.911798	0.733132	0.242125	13.4558	0.258	0.071652	0.134304	0.1167	0.351722	0.239222	0.235104
232	2018	0	Hubei	0	1	0	0	1	1.12533	2.4128	4.54356	0.637656	0.221261	0.866558	0.696757	0.004969	13.4505	0.26	0.074451	0.157247	0.11	0.346991	0.221253	1.06318
232	2019	1	Hubei	0	1	0	0	1	1.19566	2.56162	4.54414	0.559182	0.308793	0.848465	0.923053	0.236892	13.4467	0.27	0.077452	0.251446	0.1037	0.552224	0.236103	0.211326
232	2020	1	Hubei	0	1	0	0	1	1.17568	2.40124	4.28166	0.501082	0.336229	1.11267	1.23643	0.292916	13.4439	0.273	0.078292	0.259016	0.1291	0.671006	0.324672	0.144662
233	2013	0	Hubei	0	1	0	0	1	0.7177	1.7984	5.10099	0.484413	0.28515	0.774868	0.342528	0.285522	13.4405	0.31	0.188517	0.176819	0.1026	0.58865	0.434043	0.256326
233	2014	0	Hubei	0	1	0	0	1	0.7899	1.91333	5.09767	0.49447	0.308546	0.811196	0.422406	0.335136	13.5714	0.33	0.165278	0.221147	0.1794	0.623993	0.398374	0.256347
233	2015	0	Hubei	0	1	0	0	1	0.85234	2.04751	5.10099	0.489724	0.323645	0.86424	0.579879	0.308504	13.7345	0.38	0.160165	0.263092	0.1833	0.660872	0.390673	0.326797
233	2016	0	Hubei	0	1	0	0	1	0.90144	2.1838	5.1066	0.484123	0.331355	0.920148	0.671497	0.380287	13.8584	0.38	0.159779	0.263092	0.1786	0.684445	0.381119	0.274467
233	2017	0	Hubei	0	1	0	0	1	0.97247	2.31838	5.10956	0.47939	0.338743	0.945509	0.774996	0.287476	13.934	0.38	0.160122	0.229544	0.1786	0.706613	0.315872	0.37785
233	2018	1	Hubei	0	1	0	0	1	1.0375	2.4475	5.10956	0.480718	0.368198	1.0365	0.851233	0.270284	13.9874	0.36	0.158277	0.217991	0.205	0.765932	0.314288	0.398515
233	2019	1	Hubei	0	1	0	0	1	1.09992	2.60661	5.10956	0.469634	0.406148	0.912476	0.741028	0.231673	14.0252	0.38	0.158755	0.160773	0.2036	0.864816	0.264499	0.360819
233	2020	1	Hubei	0	1	0	0	1	1.08421	2.44017	4.93222	0.474436	0.385123	1.05551	0.874475	0.274993	14.0519	0.37	0.159393	0.305057	0.2372	0.811748	0.296017	0.194057
234	2013	0	Hubei	0	1	0	0	1	0.7029	1.8037	5.00186	0.390132	0.363678	0.982282	0.461484	0.243127	13.4238	0.26	0.181921	0.19601	0.0784	0.932194	0.619773	0.19235
234	2014	0	Hubei	0	1	0	0	1	0.76373	1.88294	5.00186	0.390315	0.374977	1.06533	0.547341	0.247853	13.599	0.28	0.131955	0.194638	0.3102	0.960704	0.601302	0.205234
234	2015	0	Hubei	0	1	0	0	1	0.82018	2.03061	5.00551	0.386874	0.404542	1.15093	0.599439	0.276736	13.6555	0.32	0.134341	0.221832	0.3107	1.04567	0.550385	0.201458
234	2016	0	Hubei	0	1	0	0	1	0.86382	2.17009	5.01096	0.375145	0.418825	1.20387	0.591998	0.27841	13.6806	0.34	0.139587	0.222008	0.285	1.11644	0.549208	0.20064
234	2017	0	Hubei	0	1	0	0	1	0.93115	2.31409	5.01223	0.377701	0.428733	1.24204	0.64969	0.271556	13.772	0.27	0.138187	0.266278	0.3062	1.13511	0.502866	0.203973
234	2018	0	Hubei	0	1	0	0	1	1.00783	2.44549	5.01223	0.364325	0.450764	1.31593	0.714434	0.289938	13.8633	0.27	0.145325	0.271548	0.1	1.23726	0.507545	0.200188
234	2019	1	Hubei	0	1	0	0	1	1.06592	2.59279	5.01223	0.308373	0.519342	1.28067	0.692787	0.293849	13.9546	0.27	0.152271	0.302454	0.187	1.68413	0.55869	0.172758
234	2020	1	Hubei	0	1	0	0	1	1.04459	2.42117	4.85693	0.259737	0.53069	1.56997	0.912775	0.323668	14.0459	0.27	0.158388	0.313261	0.205	2.04318	0.806866	0.109782
235	2013	0	Hubei	0	1	0	0	1	0.7536	1.7638	4.58074	0.293012	0.276733	1.03474	0.507607	0.269029	13.1941	0.3	0.117106	0.133484	0.3178	0.944444	1.45517	0.147556
235	2014	0	Hubei	0	1	0	0	1	0.82	1.84706	4.58629	0.310121	0.279822	1.13851	0.512825	0.281475	13.3609	0.33	0.098721	0.159569	0.1707	0.902299	1.32225	0.151159
235	2015	0	Hubei	0	1	0	0	1	0.8761	1.97991	4.58629	0.313747	0.305884	1.18392	0.617381	0.364389	13.4459	0.33	0.099044	0.160828	0.1812	0.974937	1.2271	0.130058
235	2016	0	Hubei	0	1	0	0	1	0.92384	2.10856	4.59099	0.310636	0.315346	1.30887	0.713387	0.256562	13.5467	0.34	0.099521	0.165698	0.1856	1.01516	1.20396	0.198552
235	2017	0	Hubei	0	1	0	0	1	0.99807	2.23526	4.59292	0.326032	0.317046	1.18072	0.643444	0.256182	13.5831	0.34	0.101544	0.168451	0.1856	0.972439	1.00132	0.193821
235	2018	0	Hubei	0	1	0	0	1	1.07457	2.36067	4.59292	0.326168	0.351266	1.4578	0.806505	0.365028	13.605	0.35	0.104832	0.171795	0.1856	1.07695	0.988955	0.688662
235	2019	1	Hubei	0	1	0	0	1	1.14252	2.50494	4.59429	0.27257	0.443513	1.35548	0.754637	0.345302	13.6183	0.36	0.107432	0.175178	0.22	1.62715	1.04163	0.128721
235	2020	1	Hubei	0	1	0	0	1	1.11441	2.33646	4.43463	0.201281	0.448194	1.75513	1.00477	0.366263	13.6264	0.363	0.10846	0.180016	0.1946	2.2267	1.74131	0.109383
236	2013	0	Hubei	0	1	0	0	1	0.8372	1.769	5.34381	0.395655	0.350179	1.03825	0.378332	0.08427	14.514	0.37	0.294167	0.246958	0.3809	0.885061	0.638977	0.607017
236	2014	0	Hubei	0	1	0	0	1	0.92392	1.96206	5.34899	0.400798	0.360201	1.12305	0.438219	0.098867	14.6738	0.39	0.27068	0.282386	0.3893	0.89871	0.589921	0.561633
236	2015	0	Hubei	0	1	0	0	1	0.99864	2.10989	5.35286	0.393902	0.379897	1.20777	0.47887	0.106558	14.7124	0.42	0.275493	0.298376	0.3904	0.964445	0.584391	0.560835
236	2016	0	Hubei	0	1	0	0	1	1.06354	2.27019	5.35709	0.383369	0.394297	1.28618	0.540818	0.120746	14.7946	0.44	0.237342	0.307281	0.412	1.0285	0.579947	0.484059
236	2017	0	Hubei	0	1	0	0	1	1.15183	2.41732	5.35889	0.379513	0.407117	1.31993	0.592046	0.114741	14.8413	0.376	0.290358	0.319298	0.4285	1.07274	0.54104	0.508017
236	2018	0	Hubei	0	1	0	0	1	1.24402	2.55578	5.35889	0.374062	0.428856	1.39006	0.677913	0.227836	14.8691	0.378	0.305429	0.323394	0.4329	1.14648	0.52687	0.251046
236	2019	0	Hubei	0	1	0	0	1	1.32549	2.72581	5.35953	0.300328	0.507662	1.41823	0.743534	0.229585	14.8856	0.38	0.281916	0.33172	0.4329	1.69036	0.639338	0.231715
236	2020	1	Hubei	0	1	0	0	1	1.29581	2.57091	5.3721	0.287249	0.488823	1.70698	0.993981	0.300017	14.8954	0.384	0.324587	0.352824	0.247	1.70174	0.779561	0.227117
237	2013	0	Hubei	0	1	0	0	1	0.8088	1.8371	5.46591	0.429332	0.331392	0.768553	0.595892	0.203493	14.74	0.37	0.284713	0.289519	0.32	0.771879	0.53958	0.269869
237	2014	0	Hubei	0	1	0	0	1	0.88608	2.07931	5.47164	0.432148	0.34169	0.819355	0.6486	0.205521	15.0118	0.41	0.274465	0.317545	0.32	0.790678	0.598381	0.28019
237	2015	0	Hubei	0	1	0	0	1	0.95036	2.24808	5.47734	0.424851	0.367518	0.877328	0.672711	0.211832	15.1738	0.44	0.272702	0.338881	0.3242	0.865051	0.579966	0.289728
237	2016	0	Hubei	0	1	0	0	1	1.00674	2.41064	5.47825	0.412889	0.383483	0.921776	0.741017	0.209689	15.2293	0.45	0.275412	0.341483	0.3471	0.928779	0.493178	0.28727
237	2017	0	Hubei	0	1	0	0	1	1.08891	2.58346	5.47779	0.392255	0.390289	0.907013	0.757484	0.204168	15.2518	0.41	0.279867	0.336098	0.3743	0.994988	0.468606	0.311935
237	2018	0	Hubei	0	1	0	0	1	1.16577	2.73554	5.47779	0.388905	0.428389	1.00008	0.815091	0.222937	15.2627	0.4	0.287608	0.344458	0.3746	1.10152	0.469795	0.298055
237	2019	0	Hubei	0	1	0	0	1	1.24082	2.91648	5.47779	0.435149	0.404331	0.958433	0.742718	0.211982	15.2679	0.39	0.295606	0.344419	0.3712	0.929177	0.368886	0.262752
237	2020	1	Hubei	0	1	0	0	1	1.22154	2.72681	5.49278	0.382958	0.422476	1.19865	0.900752	0.234917	15.2705	0.38	0.299756	0.365404	0.3715	1.10319	0.508056	0.195616
238	2013	0	Hubei	0	1	0	0	1	0.6585	1.8667	5.33729	0.401669	0.42648	0.84331	1.62473	0.298483	13.7232	0.42	0.260389	0.454946	0.361	1.06177	0.427758	0.368009
238	2014	0	Hubei	0	1	0	0	1	0.73069	2.17078	5.3399	0.400827	0.433017	0.970411	1.76197	0.184134	13.8203	0.44	0.26151	0.527435	0.3325	1.08031	0.40221	0.633095
238	2015	0	Hubei	0	1	0	0	1	0.79903	2.33954	5.34381	0.399778	0.446442	0.993783	1.84406	0.437194	13.9936	0.47	0.265652	0.551602	0.3549	1.11673	0.384683	0.286102
238	2016	0	Hubei	0	1	0	0	1	0.85418	2.51036	5.34808	0.393569	0.459322	1.03192	1.92407	0.314822	14.1113	0.25	0.269946	0.572879	0.2202	1.16707	0.373845	0.346167
238	2017	0	Hubei	0	1	0	0	1	0.92435	2.71209	5.35286	0.400191	0.46288	0.913314	1.92031	0.291906	14.1986	0.25	0.273223	0.38783	0.2247	1.15665	0.347581	0.34245
238	2018	0	Hubei	0	1	0	0	1	0.99468	2.87002	5.35786	0.389438	0.48439	1.07332	2.00631	0.30864	14.2707	0.28	0.284399	0.643571	0.1668	1.24382	0.323984	0.320862
238	2019	0	Hubei	0	1	0	0	1	1.06716	3.03763	5.36131	0.401507	0.517469	0.688018	1.39391	0.22984	14.3302	0.26	0.292617	0.692136	0.3206	1.28882	0.201798	0.262053
238	2020	1	Hubei	0	1	0	0	1	1.05477	2.88323	5.427	0.359844	0.543716	0.920759	1.61347	0.265331	14.3794	0.27	0.303662	0.703307	0.3507	1.51098	0.268021	0.170897
239	2013	0	Hubei	0	1	0	0	1	0.6299	1.607	5.18662	0.268368	0.384899	1.15691	0.669796	0.429689	12.99	0.38	0.285545	0.235022	0.08	1.43422	1.29197	0.218963
239	2014	0	Hubei	0	1	0	0	1	0.6952	1.9698	5.18965	0.278705	0.389779	1.22104	0.806045	0.42527	13.1549	0.4	0.289766	0.294729	0.203	1.39854	1.16969	0.226305
239	2015	0	Hubei	0	1	0	0	1	0.75702	2.135	5.19268	0.281593	0.405887	1.21667	0.918209	0.512112	13.1684	0.41	0.299468	0.336067	0.203	1.4414	1.10978	0.192366
239	2016	0	Hubei	0	1	0	0	1	0.81354	2.30714	5.1987	0.27562	0.423059	1.29891	1.09826	0.558833	13.2138	0.34	0.312188	0.374846	0.203	1.53493	1.09336	0.163891
239	2017	0	Hubei	0	1	0	0	1	0.88172	2.48619	5.2032	0.280372	0.443834	1.3719	1.25194	0.5507	13.2328	0.35	0.321807	0.38783	0.203	1.58302	1.06167	0.156689
239	2018	0	Hubei	0	1	0	0	1	0.95095	2.631	5.20827	0.27418	0.451911	1.40298	1.26996	0.523167	13.2362	0.39	0.33137	0.395956	0.1922	1.64823	0.999012	0.162462
239	2019	0	Hubei	0	1	0	0	1	1.02137	2.78337	5.21139	0.166675	0.653375	1.0063	0.979364	0.354561	13.2369	0.4	0.340211	0.404889	0.1182	3.92006	1.07965	0.164463
239	2020	1	Hubei	0	1	0	0	1	1.00891	2.6433	5.31842	0.153583	0.639235	1.17506	1.14802	0.35768	13.237	0.41	0.341336	0.420094	0.1929	4.16214	1.34899	0.123122
240	2013	0	Hubei	0	1	0	0	1	0.6271	1.5962	4.72569	0.333021	0.404056	0.585575	0.392477	0.353176	13.0409	0.24	0.132021	0.196851	0.1487	1.2133	0.779845	0.34314
240	2014	0	Hubei	0	1	0	0	1	0.70049	1.86451	4.72569	0.336606	0.415665	0.76038	0.623287	0.384122	13.0822	0.29	0.132275	0.210639	0.1527	1.23487	0.723025	0.168563
240	2015	0	Hubei	0	1	0	0	1	0.76484	2.0055	4.7281	0.344819	0.421445	0.769735	0.694081	0.405364	13.2176	0.32	0.135545	0.227794	0.1562	1.22222	0.677852	0.163211
240	2016	0	Hubei	0	1	0	0	1	0.82129	2.16139	4.73385	0.345907	0.432294	0.791197	0.701036	0.387741	13.2714	0.32	0.136599	0.232082	0.1511	1.24974	0.641073	0.277222
240	2017	0	Hubei	0	1	0	0	1	0.88638	2.33978	4.73815	0.327617	0.457707	0.853826	0.785499	0.425246	13.3584	0.32	0.138352	0.239517	0.1511	1.39708	0.690869	0.147038
240	2018	0	Hubei	0	1	0	0	1	0.95287	2.48548	4.74313	0.326293	0.471924	0.889179	0.766261	0.453938	13.4305	0.33	0.14004	0.236488	0.1531	1.44632	0.618412	0.132389
240	2019	0	Hubei	0	1	0	0	1	1.02376	2.62848	4.74715	0.205179	0.602424	0.888152	0.738699	0.404239	13.4902	0.33	0.139157	0.238232	0.1401	2.93608	0.937702	0.141165
240	2020	1	Hubei	0	1	0	0	1	1.01019	2.50101	4.71747	0.163963	0.531313	1.08037	0.830343	0.459512	13.5396	0.34	0.138278	0.242828	0.1206	3.24044	1.11262	0.092069
241	2013	0	Hubei	0	1	0	0	1	0.6317	1.5979	4.74715	0.417568	0.368227	0.674722	0.488453	0.385419	12.9496	0.35	0.136289	0.158219	0.1171	0.881838	0.512984	0.182553
241	2014	0	Hubei	0	1	0	0	1	0.7	1.8748	4.74715	0.418374	0.378631	0.690058	0.505449	0.3678	13.0507	0.36	0.135996	0.173863	0.109	0.905005	0.48523	0.181054
241	2015	0	Hubei	0	1	0	0	1	0.76224	2.0336	4.7495	0.41303	0.392235	0.703624	0.5173	0.373111	13.09	0.36	0.13912	0.167766	0.1195	0.949654	0.471346	0.176795
241	2016	0	Hubei	0	1	0	0	1	0.81552	2.19467	4.75443	0.410792	0.400282	0.781849	0.573337	0.380497	13.1093	0.34	0.142146	0.173863	0.1355	0.974414	0.4599	0.161379
241	2017	0	Hubei	0	1	0	0	1	0.882	2.37311	4.75887	0.410002	0.415627	0.831905	0.618929	0.356734	13.1289	0.34	0.143191	0.173891	0.204	1.01372	0.460386	0.169457
241	2018	0	Hubei	0	1	0	0	1	0.94821	2.52346	4.76399	0.390779	0.434176	0.880466	0.659742	0.425465	13.143	0.34	0.145125	0.215586	0.0831	1.11105	0.447938	0.213406
241	2019	0	Hubei	0	1	0	0	1	1.01588	2.67303	4.76561	0.247058	0.575239	0.902183	0.635997	0.453162	13.1531	0.34	0.146401	0.215626	0.1316	2.32836	0.719276	0.179455
241	2020	1	Hubei	0	1	0	0	1	1.00514	2.53275	4.67731	0.251487	0.546752	1.04349	0.759018	0.494559	13.1603	0.33	0.14686	0.215915	0.1315	2.17408	0.802276	0.076004
242	2013	0	Hubei	0	1	0	0	1	0.6269	1.5974	4.40153	0.283834	0.421162	0.725886	0.427579	0.38549	12.2421	0.22	0.096645	0.098748	0.1395	1.48383	1.03899	0.125351
242	2014	0	Hubei	0	1	0	0	1	0.69098	1.85	4.40784	0.286572	0.432232	0.768965	0.49125	0.401528	12.4203	0.25	0.094468	0.106305	0.1395	1.50829	0.967243	0.128122
242	2015	0	Hubei	0	1	0	0	1	0.75374	1.98995	4.41115	0.288139	0.445575	0.778858	0.63273	0.476308	12.5732	0.27	0.095199	0.12387	0.1294	1.54639	0.924211	0.113561
242	2016	0	Hubei	0	1	0	0	1	0.80815	2.15355	4.41576	0.286015	0.459475	0.78251	0.647805	0.459902	12.7267	0.27	0.097103	0.121234	0.1171	1.60647	0.890118	0.118679
242	2017	0	Hubei	0	1	0	0	1	0.87567	2.32266	4.42035	0.288579	0.477423	0.830887	0.770605	0.452273	12.8534	0.27	0.10044	0.115869	0.1165	1.65439	0.904747	0.118667
242	2018	0	Hubei	0	1	0	0	1	0.94401	2.46073	4.42524	0.267141	0.491532	0.848881	0.848615	0.481847	12.9643	0.29	0.103001	0.13771	0.1162	1.83998	0.903371	0.110199
242	2019	1	Hubei	0	1	0	0	1	1.00924	2.60776	4.4314	0.150158	0.610626	0.853087	0.857595	0.46981	13.0615	0.3	0.103703	0.143398	0.0637	4.06655	1.59309	0.106593
242	2020	1	Hubei	0	1	0	0	1	0.99975	2.46644	4.3499	0.131883	0.602676	0.964093	0.962875	0.535171	13.1467	0.32	0.101782	0.155149	0.1497	4.56978	2.01271	0.071639
243	2013	0	Hubei	0	1	0	0	1	0.623	1.5892	4.41444	0.30804	0.439861	0.602421	0.355309	0.339721	13.0501	0.23	0.098184	0.127342	0.135	1.42793	0.818273	0.162608
243	2014	0	Hubei	0	1	0	0	1	0.69382	1.8548	4.41444	0.310084	0.44966	0.806921	0.447957	0.266766	13.2665	0.25	0.112761	0.149788	0.1366	1.45012	0.76207	0.210728
243	2015	0	Hubei	0	1	0	0	1	0.75866	2.00627	4.41773	0.320467	0.45792	0.83187	0.526748	0.356477	13.4184	0.26	0.115281	0.152794	0.19	1.42892	0.702214	0.156059
243	2016	0	Hubei	0	1	0	0	1	0.8141	2.15922	4.42296	0.310939	0.459601	0.876631	0.582433	0.48293	13.4965	0.27	0.118141	0.156853	0.1322	1.47811	0.738044	0.188385
243	2017	0	Hubei	0	1	0	0	1	0.88191	2.32685	4.42751	0.301478	0.481189	0.914863	0.723656	0.373747	13.5674	0.29	0.123425	0.165968	0.1608	1.5961	0.728993	0.257926
243	2018	0	Hubei	0	1	0	0	1	0.94858	2.47014	4.4327	0.288173	0.504748	0.980029	0.832113	0.427849	13.6229	0.32	0.123339	0.166168	0.1608	1.75154	0.718592	0.129166
243	2019	0	Hubei	0	1	0	0	1	1.01632	2.62033	4.43849	0.170305	0.625181	0.977243	0.835635	0.436566	13.6663	0.35	0.145435	0.177693	0.1026	3.67094	1.20087	0.112637
243	2020	1	Hubei	0	1	0	0	1	1.00283	2.49527	4.46198	0.113167	0.653231	1.16783	0.980562	0.454319	13.7003	0.39	0.131906	0.185936	0.1072	5.7723	2.06452	0.066215
244	2013	0	Hubei	0	1	0	0	1	0.6263	1.6209	4.19458	0.28381	0.479647	0.566146	0.241351	0.351113	12.7017	0.19	0.1003	0.127355	0.1067	1.69003	0.807117	0.151737
244	2014	0	Hubei	0	1	0	0	1	0.69118	1.90176	4.19867	0.297572	0.486574	0.861498	0.73724	0.36781	12.8049	0.21	0.102445	0.132401	0.112	1.63515	0.713268	0.16104
244	2015	0	Hubei	0	1	0	0	1	0.75268	2.06547	4.20275	0.302843	0.493481	0.858911	0.88256	0.359722	12.9647	0.22	0.107045	0.145242	0.1097	1.62949	0.672364	0.179143
244	2016	0	Hubei	0	1	0	0	1	0.80739	2.21253	4.2068	0.294073	0.501021	0.896784	0.936924	0.402628	13.0117	0.2	0.110772	0.146737	0.09	1.70373	0.696535	0.151924
244	2017	0	Hubei	0	1	0	0	1	0.87139	2.39116	4.21084	0.290125	0.519446	0.96924	0.999958	0.370585	13.0119	0.2	0.11421	0.150341	0.09	1.79042	0.698807	0.153036
244	2018	0	Hubei	0	1	0	0	1	0.93863	2.53377	4.21607	0.266988	0.545472	1.00368	0.981308	0.405599	13.0118	0.21	0.119647	0.152659	0.09	2.04306	0.702427	0.136009
244	2019	1	Hubei	0	1	0	0	1	1.00446	2.6864	4.21968	0.179542	0.640917	1.00263	0.936162	0.379933	13.0119	0.214	0.123023	0.159557	0.09	3.56974	1	0.131192
244	2020	1	Hubei	0	1	0	0	1	0.9959	2.54259	4.34392	0.144401	0.647984	1.19339	1.07381	0.450869	13.0119	0.2149	0.125821	0.158634	0.0891	4.4874	1.43777	0.079867
245	2013	0	Hubei	0	1	0	0	1	0.6677	1.6379	4.00072	0.418327	0.351951	0.747826	0.64532	0.36469	12.9867	0.33	0.049572	0.080232	0.0983	0.841331	0.548956	0.140344
245	2014	0	Hubei	0	1	0	0	1	0.7398	1.88539	4.00568	0.418622	0.362788	0.793093	0.639915	0.428074	13.1571	0.33	0.047804	0.083388	0.0996	0.866623	0.518453	0.191296
245	2015	0	Hubei	0	1	0	0	1	0.8085	2.03939	4.00568	0.423533	0.371012	0.798236	0.668546	0.48127	13.1796	0.36	0.045964	0.08437	0.0698	0.875993	0.485008	0.132098
245	2016	0	Hubei	0	1	0	0	1	0.86571	2.1855	4.01161	0.416641	0.38491	0.84141	0.695042	0.496187	13.304	0.39	0.045109	0.08414	0.1038	0.92384	0.476446	0.129239
245	2017	0	Hubei	0	1	0	0	1	0.93478	2.35961	4.01553	0.418007	0.390633	0.87945	0.624668	0.476772	13.4105	0.37	0.044676	0.085198	0.1038	0.934512	0.502468	0.124098
245	2018	0	Hubei	0	1	0	0	1	1.00673	2.50291	4.02042	0.397587	0.406995	0.901828	0.664452	0.459678	13.5098	0.4	0.045098	0.085564	0.0998	1.02366	0.491509	0.109762
245	2019	1	Hubei	0	1	0	0	1	1.07628	2.65053	4.02286	0.197229	0.59854	0.892486	0.583924	0.420212	13.6023	0.44	0.045021	0.087026	0.1012	3.03474	1.0355	0.110845
245	2020	1	Hubei	0	1	0	0	1	1.06786	2.50682	3.86049	0.164083	0.602408	1.09381	0.694773	0.48021	13.6884	0.48	0.044332	0.086341	0.1124	3.67136	1.42347	0.062454
246	2013	0	Hubei	0	1	0	0	1	0.6305	1.4937	3.03862	0.413032	0.492983	0.856182	0.458137	0.854949	11.5676	0.11	0.015075	0.025992	0.027	1.19357	0.230769	0.188708
246	2014	0	Hubei	0	1	0	0	1	0.67843	1.94216	3.03862	0.403656	0.503888	0.933943	0.528814	0.831897	11.4975	0.11	0.015833	0.034344	0.055	1.24831	0.232558	0.200094
246	2015	0	Hubei	0	1	0	0	1	0.73182	2.06701	3.03992	0.369451	0.537079	0.994668	0.693776	0.991866	11.1982	0.13	0.015374	0.033518	0.057	1.45372	0.25323	0.185653
246	2016	0	Hubei	0	1	0	0	1	0.78849	2.21669	3.03992	0.352125	0.553049	1.03179	0.860087	0.740876	11.2542	0.13	0.014749	0.038635	0.0538	1.5706	0.269704	0.364679
246	2017	0	Hubei	0	1	0	0	1	0.85678	2.43305	3.03862	0.353955	0.556848	0.991231	0.792677	0.774622	11.1503	0.14	0.015427	0.039186	0.0538	1.57322	0.238178	0.350379
246	2018	1	Hubei	0	1	0	0	1	0.91553	2.65985	3.03732	0.390967	0.532785	0.959819	0.823465	0.738084	11.2532	0.115	0.015074	0.039793	0.0538	1.36274	0.195024	0.241545
246	2019	1	Hubei	0	1	0	0	1	0.96629	2.87539	3.02946	0.309131	0.618868	0.935373	0.811248	0.727989	11.1512	0.117	0.01516	0.040698	0.0539	2.00196	0.232914	0.218142
246	2020	1	Hubei	0	1	0	0	1	1.01473	3.09577	2.89612	0.29697	0.624471	1.1761	1.01995	0.680365	11.2523	0.12	0.015492	0.045043	0.0656	2.10281	0.264538	0.18282
247	2013	0	Hunan	0	1	0	0	1	0.5984	2.2226	5.05699	0.415985	0.36507	0.749511	0.452817	0.1708	14.0418	0.68	0.158198	0.15468	0.105	0.877604	0.526327	0.476262
247	2014	0	Hunan	0	1	0	0	1	0.65358	2.38184	5.06389	0.413775	0.374394	0.766714	0.481657	0.176052	14.1436	0.71	0.167037	0.298392	0.1376	0.904825	0.511947	0.301836
247	2015	0	Hunan	0	1	0	0	1	0.70364	2.54999	5.07414	0.408658	0.39425	0.802247	0.522404	0.199048	14.2412	0.71	0.177975	0.300241	0.205	0.964742	0.482291	0.276286
247	2016	0	Hunan	0	1	0	0	1	0.75213	2.71425	5.07872	0.388281	0.414745	0.828344	0.528152	0.198064	14.3329	0.73	0.188014	0.254708	0.045	1.06816	0.507299	0.281725
247	2017	0	Hunan	0	1	0	0	1	0.81871	2.8874	5.07872	0.336828	0.496663	0.958621	0.627204	0.241858	14.4181	0.76	0.198991	0.234061	0.0135	1.47453	0.494344	0.231923
247	2018	1	Hunan	0	1	0	0	1	0.87959	3.05101	5.08177	0.309306	0.533527	0.986886	0.656868	0.229504	14.4963	0.79	0.209998	0.273965	0.1128	1.72492	0.508128	0.167356
247	2019	1	Hunan	0	1	0	0	1	0.93757	3.22243	5.08362	0.321384	0.517713	0.944042	0.63874	0.198252	14.5679	0.82	0.215592	0.271495	0.2052	1.61089	0.500655	0.328425
247	2020	1	Hunan	0	1	0	0	1	1.00628	3.30426	4.89549	0.335716	0.489298	1.00212	0.708992	0.202824	14.6336	0.86	0.221037	0.250043	0.2042	1.45748	0.521235	0.178326
248	2013	0	Hunan	0	1	0	0	1	0.5525	1.9271	4.00568	0.528181	0.327765	0.773994	0.670759	0.25165	13.4834	0.16	0.049096	0.059486	0.0716	0.620553	0.272737	0.591736
248	2014	0	Hunan	0	1	0	0	1	0.60402	2.06153	4.00568	0.524901	0.341709	0.760372	0.729202	0.255315	13.6352	0.16	0.050758	0.058979	0.055	0.650997	0.254125	0.400128
248	2015	0	Hunan	0	1	0	0	1	0.65049	2.20248	4.01553	0.515324	0.354455	0.748765	0.816446	0.295056	13.6505	0.16	0.052492	0.059726	0.0625	0.687829	0.252698	0.364757
248	2016	0	Hunan	0	1	0	0	1	0.69949	2.33799	4.01651	0.493951	0.375831	0.764589	0.769136	0.278722	13.8509	0.19	0.0538	0.075491	0.0625	0.760867	0.263625	0.396205
248	2017	0	Hunan	0	1	0	0	1	0.76026	2.48563	4.01651	0.415344	0.442074	0.847567	0.863413	0.281127	13.9758	0.19	0.054977	0.078179	0.126	1.06436	0.343288	0.399883
248	2018	1	Hunan	0	1	0	0	1	0.81602	2.62178	4.01504	0.386215	0.473268	0.857876	0.83024	0.236765	14.0879	0.2	0.056712	0.090981	0.126	1.2254	0.363831	0.180075
248	2019	1	Hunan	0	1	0	0	1	0.86901	2.76137	4.01259	0.383366	0.469712	0.82386	0.760939	0.228713	14.1885	0.22	0.05738	0.097085	0.1346	1.22523	0.38324	0.309146
248	2020	1	Hunan	0	1	0	0	1	0.9335	2.82616	3.77446	0.390625	0.443671	0.888368	0.856314	0.211774	14.2788	0.23	0.05711	0.094746	0.1362	1.1358	0.424201	0.185501
249	2013	0	Hunan	0	1	0	0	1	0.6505	1.7392	5.32015	0.395111	0.347805	0.86726	0.617109	0.275905	14.0747	0.24	0.289397	0.188026	0.053	0.880271	0.650664	0.313092
249	2014	0	Hunan	0	1	0	0	1	0.71335	1.86398	5.33073	0.388141	0.366962	0.908008	0.639283	0.29254	14.2799	0.24	0.305712	0.192078	0.0858	0.945434	0.630949	0.212186
249	2015	0	Hunan	0	1	0	0	1	0.78882	1.98507	5.34381	0.371255	0.380102	0.924239	0.603897	0.318143	14.4082	0.25	0.293438	0.201158	0.0858	1.02383	0.669736	0.211115
249	2016	0	Hunan	0	1	0	0	1	0.8613	2.13628	5.35889	0.360093	0.389102	0.962632	0.597181	0.326447	14.4943	0.25	0.296428	0.22245	0.0858	1.08056	0.696499	0.197693
249	2017	0	Hunan	0	1	0	0	1	0.93861	2.29023	5.35965	0.368534	0.431144	1.06719	0.641574	0.349885	14.5624	0.25	0.289975	0.229021	0.0875	1.16989	0.543562	0.18188
249	2018	0	Hunan	0	1	0	0	1	1.02778	2.44254	5.3659	0.362637	0.443619	1.04715	0.674984	0.289399	14.6175	0.25	0.275431	0.375615	0.0875	1.22331	0.534264	0.14859
249	2019	1	Hunan	0	1	0	0	1	1.10048	2.58212	5.3721	0.253387	0.533788	1.06303	0.731909	0.290168	14.662	0.26	0.269611	0.335785	0.09	2.10661	0.83992	0.237291
249	2020	1	Hunan	0	1	0	0	1	1.16334	2.66386	5.11496	0.286995	0.476996	1.13621	0.858607	0.295785	14.698	0.26	0.266173	0.282781	0.096	1.66203	0.822343	0.234824
250	2013	0	Hunan	0	1	0	0	1	0.6316	1.7442	5.54966	0.374217	0.351304	1.00113	0.361601	0.306605	13.7737	0.46	0.297401	0.21501	0.1011	0.93877	0.733476	0.239595
250	2014	0	Hunan	0	1	0	0	1	0.69087	1.87076	5.55493	0.360713	0.374608	0.804176	0.354038	0.325121	13.7512	0.48	0.295144	0.247082	0.1123	1.03852	0.733765	0.147635
250	2015	0	Hunan	0	1	0	0	1	0.76326	1.99359	5.56226	0.34628	0.388489	1.03406	0.416783	0.355141	13.9491	0.5	0.288966	0.252413	0.1229	1.1219	0.765945	0.144517
250	2016	0	Hunan	0	1	0	0	1	0.83422	2.12991	5.55282	0.33914	0.400343	1.08559	0.425052	0.353546	14.0559	0.5	0.292204	0.267026	0.1342	1.18047	0.768171	0.144332
250	2017	0	Hunan	0	1	0	0	1	0.90995	2.28545	5.53999	0.349455	0.425878	1.15232	0.466785	0.37487	14.167	0.52	0.28566	0.282529	0.1412	1.21869	0.642907	0.127664
250	2018	0	Hunan	0	1	0	0	1	0.99278	2.44419	5.51907	0.341514	0.441248	1.11857	0.474789	0.38915	14.2719	0.51	0.282131	0.390639	0.1412	1.29203	0.636102	0.080891
250	2019	0	Hunan	0	1	0	0	1	1.06593	2.57909	5.50147	0.282499	0.488332	1.06395	0.458218	0.327325	14.3709	0.52	0.280488	0.292893	0.1412	1.72862	0.811222	0.154164
[truncated: 4,577 more rows]
